# Supplementary material for: MicroRNA Profiling in Cartilage Ageing
Source: Int J Genomics. 2017 Aug 14;2017:2713725. doi: 10.1155/2017/2713725 (PMC5584353; doi:10.1155/2017/2713725)
Supplement: Supplementary file 2 [file 2713725.f2.xlsx]

## Sheet: young
transcript_id	p value young
hsa-mir-31	0.000326038
hsa-mir-190b	0
hsa-miR-511-3p	0.0175476
hsa-mir-6126	0.0231304
hsa-miR-4257	0
hsa-miR-194-3p	0.00241613
hsa-mir-410	0.000324025
hsa-miR-376b-3p	0
hsa-mir-4259	0.0115338
hsa-mir-3684	0.038543
hsa-mir-1278	0.000751464
hsa-miR-4504	0.0309264
hsa-miR-4711-5p	0.000887331
hsa-miR-1182	0.00124676
hsa-miR-6750-3p	0.0396383
hsa-mir-6874	0.00862871
hsa-mir-34c	0.00948936
hsa-mir-4678	0.0226055
hsa-miR-3129-3p	0.0306565
hsa-miR-6856-5p	0.00293973
hsa-mir-4255	0.000629345
hsa-miR-550a-5p	0.00187395
hsa-mir-606	0.00811285
hsa-mir-4455	0
hsa-miR-4786-3p	0
hsa-miR-599	0.0240125
hsa-miR-181a-2-3p	0
hsa-mir-186	0.0109274
hsa-miR-4465	0.000353875
hsa-miR-602	0.0393698
hsa-miR-378b	0.000340992
hsa-mir-6875	0.00629543
hsa-miR-3944-5p	0.00558066
hsa-miR-1205	0.00884377
hsa-mir-3687	0
hsa-mir-4785	0.0132847
hsa-miR-4423-3p	0.00898928
hsa-miR-4774-5p	0.0243555
hsa-miR-485-3p	0
hsa-mir-6729	0.0460264
hsa-mir-4698	0.0233206
hsa-miR-5681a	0.00926761
hsa-mir-3154	0
hsa-mir-3158-2	0
hsa-mir-486-2	4.23089e-05
hsa-miR-6867-5p	0
hsa-miR-4676-5p	0.000123549
hsa-mir-424	0
hsa-miR-500b-3p	0.00925425
hsa-mir-3714	0.000437406
hsa-miR-548q	0.0486888
hsa-miR-142-5p	0.0006579
hsa-mir-3655	0.00960229
hsa-mir-378f	0.000316942
hsa-miR-7152-3p	0
hsa-mir-181b-1	0.0143645
hsa-miR-4511	0.00128112
hsa-miR-503-5p	0
hsa-miR-765	0
hsa-miR-378e	0
hsa-miR-4776-5p	7.82936e-05
hsa-mir-6734	0.0423448
hsa-miR-548y	0.0260869
hsa-miR-3125	0.000805832
hsa-miR-6797-5p	0
hsa-miR-4316	0.00276168
hsa-miR-204-5p	0
hsa-miR-374b-5p	0
hsa-miR-6076	0
hsa-miR-6738-5p	0
hsa-miR-3945	0.000156793
hsa-miR-8073	0
hsa-miR-620	0.0428134
hsa-miR-329-5p	0
hsa-miR-3117-5p	0.0386511
hsa-mir-708	0
hsa-miR-5586-5p	0.0145705
hsa-mir-4685	0.0293477
hsa-miR-3120-5p	0.00768918
hsa-miR-4319	0.0130615
hsa-mir-4495	0.00190896
hsa-mir-8063	0.0107646
hsa-mir-4708	0.0484827
hsa-miR-6515-3p	0.0279791
hsa-miR-4271	0
hsa-mir-3179-1	0.0309117
hsa-mir-3179-2	0.0309117
hsa-mir-3179-3	0.0309117
hsa-mir-1973	0.00287598
hsa-miR-6857-5p	0.019755
hsa-miR-365a-3p	0.00567849
hsa-miR-365b-3p	0.00567849
hsa-mir-3126	0.0360696
hsa-miR-208a-3p	0.00191766
hsa-miR-4657	0.00028746
hsa-miR-921	0.00687149
hsa-miR-4727-3p	0
hsa-miR-4451	0
hsa-mir-3667	0.0445968
hsa-miR-7111-5p	0
hsa-miR-4788	0
hsa-mir-6876	0.00450455
hsa-miR-5047	0.0338757
hsa-miR-4709-3p	0
hsa-miR-369-3p	0.00364654
hsa-miR-640	0
hsa-miR-449b-3p	0.0255146
hsa-miR-3147	0.000152842
hsa-miR-6747-5p	0
hsa-miR-4514	0.000824229
hsa-miR-3192-5p	0.00204746
hsa-miR-424-3p	0
hsa-miR-34c-5p	0.00472141
hsa-miR-1303	0.0151383
hsa-miR-6876-5p	0
hsa-mir-4705	0.0286581
hsa-miR-4647	0
hsa-miR-6770-5p	0.00511949
hsa-miR-34c-3p	0.0445869
hsa-miR-6503-3p	0.0320701
hsa-miR-3714	0
hsa-miR-4436b-3p	0.00238758
hsa-miR-654-5p	0.00695448
hsa-miR-5001-3p	0.0447264
hsa-miR-6834-5p	0
hsa-miR-569	0.015015
hsa-mir-8072	0.0145078
hsa-miR-556-3p	0.0485656
hsa-miR-6809-5p	0.00583715
hsa-miR-325	0.0215796
hsa-miR-3132	0.0169321
hsa-miR-4276	0.0352926
hsa-miR-564	0
hsa-mir-1271	0.0205588
hsa-miR-4795-5p	0
hsa-miR-6074	0.0137981
hsa-miR-6788-5p	0.028869
hsa-miR-6835-5p	0.000981188
hsa-miR-4685-5p	0.000992349
hsa-mir-4417	0.0373681
hsa-mir-337	0.00578875
hsa-miR-6131	0.000745476
hsa-miR-6747-3p	0.0362295
hsa-miR-513c-5p	0.0141896
hsa-mir-6090	0.00152957
hsa-miR-6881-5p	0.00964365
hsa-miR-2276-3p	0
hsa-miR-7978	0.047878
hsa-miR-539-5p	0
hsa-miR-4533	0.0477686
hsa-miR-4778-5p	0
hsa-miR-6768-5p	0.0144402
hsa-mir-4742	0.00726722
hsa-miR-6892-5p	0.000536581
hsa-miR-6872-5p	1.02478e-05
hsa-miR-514b-5p	0
hsa-miR-1183	0.00398722
hsa-mir-6791	0.0355067
hsa-miR-133b	0.0470529
hsa-mir-548s	0.00333486
hsa-miR-3149	0
hsa-miR-2467-3p	0
hsa-mir-4433b	0.0459485
hsa-miR-489-3p	0
hsa-miR-329-3p	0.001349
hsa-miR-3923	0.0420054
hsa-miR-5699-5p	0
hsa-miR-1321	0.0492856
hsa-miR-548w	0
hsa-miR-6746-5p	2.1724e-06
hsa-miR-378a-5p	0
hsa-mir-495	0.026746
hsa-mir-1289-1	0.0330848
hsa-miR-6815-5p	0.0145727
hsa-mir-1302-6	0.00646286
hsa-miR-6505-5p	0.0125159
hsa-miR-6737-5p	0.00420593
hsa-miR-6855-5p	0.00221442
hsa-miR-8078	0.00123466
hsa-mir-4654	0.0492924
hsa-miR-3682-3p	0.0373995
hsa-miR-4419b	0.034665
hsa-mir-6860	0.000468008
hsa-miR-4716-3p	0
hsa-miR-615-3p	0
hsa-miR-4461	0.0112529
hsa-miR-6130	0.0292998
hsa-miR-3689a-3p	0.0157419
hsa-miR-1296-5p	0.0331992
hsa-miR-4513	0.00284656
hsa-miR-3133	0.035887
hsa-miR-1273e	0
hsa-miR-4773	0.0445471
hsa-mir-181a-1	0.0221223
hsa-miR-6758-5p	0
hsa-miR-3131	0.00022421
hsa-miR-3127-5p	0.0373753
hsa-mir-143	0
hsa-miR-6851-5p	0.00611089
hsa-miR-6504-3p	0.0110726
hsa-mir-199b	0.00193934
hsa-miR-30d-3p	0.0383903
hsa-mir-7851	0.00044636
hsa-miR-510-5p	0.00377256
hsa-mir-3669	0.0430579
hsa-mir-1254-2	0.037577
hsa-miR-936	0
hsa-miR-4263	0.0489858
hsa-miR-3654	0
hsa-miR-6795-5p	0.000112153
hsa-mir-4634	0.0438484
hsa-miR-410-5p	0.0233206
hsa-mir-206	0.032463
hsa-miR-6806-5p	8.07703e-05
hsa-miR-6847-5p	0.00428935
hsa-miR-6774-5p	0.000358615
hsa-miR-3917	0.0472284
hsa-miR-410-3p	0.00279532
hsa-mir-4307	0.0371441
hsa-miR-1273d	0
hsa-miR-920	0
hsa-miR-6780b-3p	0.0072447
hsa-mir-18a	0.026525
hsa-miR-3918	0.00437243
hsa-mir-4419a	0.000302141
hsa-miR-6759-5p	0.00209728
hsa-miR-377-3p	0.0373978
hsa-miR-4460	0.0242792
hsa-miR-6742-5p	0.00126644
hsa-mir-3064	0.0388294
hsa-mir-3150a	0.00158832
hsa-miR-1226-5p	0.0423075
hsa-miR-557	0.0279157
hsa-miR-6837-5p	0.00506691
hsa-miR-4300	0.0108464
hsa-mir-665	0.00969921
hsa-miR-3660	0.00131187
hsa-miR-381-5p	0.0270478
hsa-miR-711	0.00364004
hsa-miR-4685-3p	0
hsa-miR-3934-5p	0
hsa-miR-3186-3p	0.00950172
hsa-miR-4444	0
hsa-mir-1305	0.0174927
hsa-miR-4442	8.56503e-05
hsa-mir-335	0
hsa-miR-663b	0.000407801
hsa-mir-4525	0
hsa-miR-4283	0.0030271
hsa-miR-211-3p	0.00141945
hsa-miR-6128	0
hsa-mir-6825	0.0222947
hsa-miR-206	0
hsa-miR-6877-5p	0.00278621
hsa-mir-7705	0
hsa-miR-6832-5p	0.0326797
hsa-mir-5700	0.0474393
hsa-miR-6772-5p	0.000296301
hsa-miR-6753-3p	0
hsa-miR-143-5p	0
hsa-miR-34b-3p	0
hsa-mir-139	0.00700429
hsa-mir-6833	0.0332898
hsa-mir-4313	0.0281689
hsa-miR-4259	0
hsa-miR-6787-3p	0.0484163
hsa-mir-4430	6.08158e-05
hsa-miR-4495	0
hsa-miR-6801-5p	0
hsa-miR-4436a	0.02286
hsa-mir-3135a	0.00974263
hsa-miR-338-5p	0.013369
hsa-miR-493-5p	0
hsa-miR-6883-5p	0.0261692
hsa-miR-5187-5p	0.0289494
hsa-mir-3202-1	0
hsa-miR-1255b-5p	0.0265689
hsa-miR-6730-5p	0.00555364
hsa-mir-452	0
hsa-mir-224	0
hsa-miR-4673	0.0238523
hsa-miR-6815-3p	0.0340983
hsa-mir-3202-2	0
hsa-miR-224-5p	0
hsa-miR-1273g-5p	0.0170921
hsa-miR-6761-5p	0.038825
hsa-mir-142	0.00897726
hsa-miR-218-5p	0.00229051
hsa-miR-513b-5p	0.0191135
hsa-miR-375	0
hsa-miR-6716-3p	0
hsa-miR-1253	0.0110358
hsa-miR-139-3p	0.00170168
hsa-miR-424-5p	0
hsa-miR-4748	0.0214901
hsa-miR-516a-5p	0
hsa-miR-133a-3p	0
hsa-mir-3926-1	0.0303051
hsa-miR-3198	0
hsa-mir-6754	0.00393813
hsa-miR-6514-3p	0
hsa-mir-489	0
hsa-miR-542-5p	0

## Sheet: old
transcript_id	p value old
hsa-miR-101-3p	0
hsa-miR-208a-3p	0.13702
hsa-miR-30d-3p	0.394783
hsa-miR-139-3p	0.952886
hsa-miR-181a-2-3p	0.0704497
hsa-miR-204-5p	0.110142
hsa-miR-211-3p	0.607957
hsa-miR-218-5p	0.931136
hsa-miR-224-5p	0.91573
hsa-miR-133a-3p	0.980478
hsa-miR-142-5p	0.0907935
hsa-miR-143-5p	0.643877
hsa-miR-144-5p	0.0360572
hsa-miR-146a-3p	0.0393225
hsa-miR-206	0.6233
hsa-miR-194-3p	0.0536206
hsa-miR-200a-3p	0.0137504
hsa-miR-34b-3p	0.652849
hsa-miR-34c-5p	0.172205
hsa-miR-34c-3p	0.181687
hsa-miR-363-3p	0
hsa-miR-365a-3p	0.131217
hsa-miR-365b-3p	0.131217
hsa-miR-369-3p	0.158187
hsa-miR-375	0.934447
hsa-miR-377-3p	0.497836
hsa-miR-378a-5p	0.287053
hsa-miR-381-5p	0.549075
hsa-miR-337-3p	0.00236413
hsa-miR-338-5p	0.786485
hsa-miR-133b	0.259628
hsa-miR-325	0.201905
hsa-miR-424-5p	0.95517
hsa-miR-424-3p	0.170498
hsa-miR-329-5p	0.115037
hsa-miR-329-3p	0.277058
hsa-miR-410-5p	0.435976
hsa-miR-410-3p	0.454955
hsa-miR-376b-3p	0.0542716
hsa-miR-483-3p	0.0106471
hsa-miR-485-3p	0.0802552
hsa-miR-489-3p	0.275458
hsa-miR-511-3p	0.0514947
hsa-miR-493-5p	0.804582
hsa-miR-516a-5p	0.960026
hsa-miR-503-5p	0.10223
hsa-miR-510-5p	0.401851
hsa-miR-539-5p	0.243133
hsa-miR-539-3p	0.0369768
hsa-miR-553	0.0472077
hsa-miR-556-3p	0.198226
hsa-miR-557	0.517964
hsa-miR-564	0.205433
hsa-miR-569	0.196362
hsa-miR-548a-3p	0.0122451
hsa-miR-550a-5p	0.0657204
hsa-miR-599	0.0695527
hsa-miR-602	0.072335
hsa-miR-615-3p	0.33494
hsa-miR-618	0.0293258
hsa-miR-620	0.111805
hsa-miR-640	0.162086
hsa-miR-449b-3p	0.163481
hsa-miR-654-5p	0.185641
hsa-miR-542-5p	0.999162
hsa-miR-1296-5p	0.34032
hsa-miR-766-5p	0
hsa-miR-766-3p	0.00044636
hsa-miR-765	0.103544
hsa-miR-541-3p	0.0215509
hsa-miR-877-3p	0.0107522
hsa-miR-374b-5p	0.110584
hsa-miR-920	0.466397
hsa-miR-921	0.144225
hsa-miR-936	0.419775
hsa-miR-1182	0.0598688
hsa-miR-1183	0.257783
hsa-miR-1226-5p	0.509941
hsa-miR-1234-3p	0.0257503
hsa-miR-663b	0.594193
hsa-miR-1205	0.0765798
hsa-miR-1303	0.172554
hsa-miR-1304-3p	0.00828812
hsa-miR-1243	0.0443229
hsa-miR-1253	0.94513
hsa-miR-1255b-5p	0.845824
hsa-miR-513b-5p	0.93153
hsa-miR-513c-5p	0.231612
hsa-miR-1321	0.281687
hsa-miR-1537-3p	0.0313465
hsa-miR-2053	0.0457807
hsa-miR-548q	0.0903234
hsa-miR-2276-3p	0.238383
hsa-miR-2277-5p	0.00592827
hsa-miR-711	0.557482
hsa-miR-3117-5p	0.11632
hsa-miR-3120-5p	0.117791
hsa-miR-3125	0.10724
hsa-miR-3127-5p	0.377378
hsa-miR-3129-3p	0.0638031
hsa-miR-3131	0.375794
hsa-miR-3132	0.202022
hsa-miR-3133	0.356138
hsa-miR-378b	0.0735303
hsa-miR-3147	0.165242
hsa-miR-3149	0.262417
hsa-miR-3151-3p	0.0107976
hsa-miR-548w	0.282215
hsa-miR-3186-3p	0.567316
hsa-miR-3192-5p	0.168881
hsa-miR-3198	0.996507
hsa-miR-514b-5p	0.257691
hsa-miR-1273d	0.461573
hsa-miR-4300	0.542759
hsa-miR-4312	0.0308163
hsa-miR-4316	0.109883
hsa-miR-4319	0.118333
hsa-miR-4257	0.0520177
hsa-miR-4258	0.00882864
hsa-miR-4259	0.701591
hsa-miR-2355-5p	0.015785
hsa-miR-4263	0.419925
hsa-miR-4271	0.128394
hsa-miR-4276	0.203764
hsa-miR-4279	0
hsa-miR-4283	0.602012
hsa-miR-500b-3p	0.0896398
hsa-miR-3605-3p	0.00984463
hsa-miR-3654	0.428437
hsa-miR-1273e	0.357804
hsa-miR-3660	0.548785
hsa-miR-3662	0.0469597
hsa-miR-3682-3p	0.328538
hsa-miR-3689a-3p	0.339605
hsa-miR-3714	0.182354
hsa-miR-3915	0.045801
hsa-miR-3917	0.449376
hsa-miR-3918	0.480891
hsa-miR-3923	0.279477
hsa-miR-3934-5p	0.566686
hsa-miR-548y	0.10567
hsa-miR-3944-5p	0.0748125
hsa-miR-3945	0.111269
hsa-miR-378e	0.103587
hsa-miR-4423-3p	0.0786285
hsa-miR-548ac	0.0256835
hsa-miR-4436a	0.774622
hsa-miR-4442	0.575521
hsa-miR-4444	0.572658
hsa-miR-4451	0.148677
hsa-miR-4460	0.498582
hsa-miR-4461	0.336016
hsa-miR-4465	0.0706638
hsa-miR-4495	0.728428
hsa-miR-4419b	0.330911
hsa-miR-4504	0.0564579
hsa-miR-4511	0.100427
hsa-miR-4513	0.351353
hsa-miR-4514	0.167313
hsa-miR-4533	0.246005
hsa-miR-4647	0.177991
hsa-miR-4657	0.143211
hsa-miR-4668-3p	0.0120192
hsa-miR-4673	0.88867
hsa-miR-4676-5p	0.0885169
hsa-miR-4685-5p	0.218274
hsa-miR-4685-3p	0.559201
hsa-miR-4701-5p	0.0112468
hsa-miR-4709-3p	0.157823
hsa-miR-4711-5p	0.0566145
hsa-miR-4716-3p	0.333423
hsa-miR-4720-5p	0.0225987
hsa-miR-4520b-3p	0.045298
hsa-miR-4727-3p	0.146723
hsa-miR-4748	0.957735
hsa-miR-4750-3p	0.00165791
hsa-miR-4762-5p	0.0205795
hsa-miR-4773	0.361608
hsa-miR-4774-5p	0.0793527
hsa-miR-4775	0.0296435
hsa-miR-4776-5p	0.103975
hsa-miR-4778-5p	0.246722
hsa-miR-4436b-3p	0.183085
hsa-miR-2467-3p	0.264569
hsa-miR-4786-3p	0.0685505
hsa-miR-4788	0.1501
hsa-miR-4795-5p	0.208211
hsa-miR-5001-3p	0.193297
hsa-miR-5047	0.157717
hsa-miR-1273g-5p	0.919026
hsa-miR-5186	0.0348227
hsa-miR-5187-5p	0.831843
hsa-miR-5586-5p	0.117203
hsa-miR-5588-3p	0.0129969
hsa-miR-5681a	0.0823708
hsa-miR-5699-5p	0.280922
hsa-miR-6074	0.210659
hsa-miR-6076	0.111042
hsa-miR-6128	0.610012
hsa-miR-6130	0.339568
hsa-miR-6131	0.227214
hsa-miR-6503-5p	0
hsa-miR-6503-3p	0.18215
hsa-miR-6504-3p	0.392961
hsa-miR-6505-5p	0.305507
hsa-miR-6505-3p	0.00342888
hsa-miR-6514-3p	0.997818
hsa-miR-6515-3p	0.126982
hsa-miR-6715a-3p	0.00139525
hsa-miR-6716-3p	0.94151
hsa-miR-6511b-3p	0.0370179
hsa-miR-6730-5p	0.847614
hsa-miR-6731-3p	0.00694996
hsa-miR-6737-5p	0.311834
hsa-miR-6738-5p	0.111196
hsa-miR-6742-5p	0.500373
hsa-miR-6746-5p	0.283689
hsa-miR-6747-5p	0.165603
hsa-miR-6747-3p	0.227504
hsa-miR-6750-3p	0.0624566
hsa-miR-6753-3p	0.643843
hsa-miR-6758-5p	0.36778
hsa-miR-6759-5p	0.486392
hsa-miR-6761-5p	0.92154
hsa-miR-6766-3p	0.0122884
hsa-miR-6768-5p	0.24736
hsa-miR-6770-5p	0.181523
hsa-miR-6772-5p	0.642788
hsa-miR-6774-5p	0.448587
hsa-miR-6787-3p	0.718985
hsa-miR-6788-5p	0.214638
hsa-miR-6794-3p	0.00414901
hsa-miR-6795-5p	0.433928
hsa-miR-6796-3p	0.00666694
hsa-miR-6797-5p	0.108878
hsa-miR-6801-5p	0.738248
hsa-miR-6806-5p	0.441742
hsa-miR-6809-5p	0.198507
hsa-miR-6815-5p	0.301659
hsa-miR-6815-3p	0.902102
hsa-miR-6819-3p	0.0393146
hsa-miR-6832-5p	0.640408
hsa-miR-6834-5p	0.194215
hsa-miR-6834-3p	0.0424276
hsa-miR-6835-5p	0.216352
hsa-miR-6780b-3p	0.475441
hsa-miR-6837-5p	0.5369
hsa-miR-6838-5p	0.0212507
hsa-miR-6847-5p	0.446055
hsa-miR-6851-5p	0.380419
hsa-miR-6855-5p	0.312402
hsa-miR-6856-5p	0.0643663
hsa-miR-6857-5p	0.130349
hsa-miR-6769b-3p	0.01225
hsa-miR-6867-5p	0.0857164
hsa-miR-6872-5p	0.256353
hsa-miR-6876-5p	0.174475
hsa-miR-6877-5p	0.624783
hsa-miR-6881-5p	0.23786
hsa-miR-6883-5p	0.822592
hsa-miR-6889-3p	0.0148913
hsa-miR-6890-3p	0.0490538
hsa-miR-6892-5p	0.254979
hsa-miR-6895-5p	0.0352962
hsa-miR-7110-3p	0.037056
hsa-miR-7111-5p	0.149362
hsa-miR-7111-3p	0.000443681
hsa-miR-7114-3p	0.0384391
hsa-miR-7152-5p	0.0342485
hsa-miR-7152-3p	0.099639
hsa-miR-7154-5p	0.044615
hsa-miR-7705	0.0390599
hsa-miR-4433b-5p	0.000815052
hsa-miR-7978	0.239864
hsa-miR-8073	0.111339
hsa-miR-8078	0.313774
hsa-let-7a-1	0.000122828
hsa-mir-16-1	0.0387326
hsa-mir-18a	0.478898
hsa-mir-19a	0.031
hsa-mir-31	0.0507621
hsa-mir-139	0.673938
hsa-mir-181b-1	0.0999175
hsa-mir-199b	0.393534
hsa-mir-203a	0.0214646
hsa-mir-181a-1	0.364901
hsa-mir-224	0.879716
hsa-mir-200b	0.0364612
hsa-mir-122	0.0373267
hsa-mir-142	0.923897
hsa-mir-143	0.379525
hsa-mir-153-2	0.0250702
hsa-mir-186	0.0705222
hsa-mir-206	0.439035
hsa-mir-34c	0.0633037
hsa-mir-99b	0.0187222
hsa-mir-330	0.0358093
hsa-mir-337	0.221604
hsa-mir-335	0.588102
hsa-mir-424	0.0892901
hsa-mir-329-1	0.0308582
hsa-mir-452	0.861826
hsa-mir-410	0.0542446
hsa-mir-487a	0
hsa-mir-489	0.998715
hsa-mir-495	0.291835
hsa-mir-501	0.03709
hsa-mir-539	0.0270155
hsa-mir-559	0.000728125
hsa-mir-561	0.0366696
hsa-mir-551b	0.0457445
hsa-mir-600	0.0475068
hsa-mir-606	0.0663943
hsa-mir-1271	0.205538
hsa-mir-891a	0.0365261
hsa-mir-708	0.116546
hsa-mir-190b	0.0514618
hsa-mir-665	0.543463
hsa-mir-1225	0.000591503
hsa-mir-1289-1	0.298438
hsa-mir-1302-5	0
hsa-mir-1302-6	0.30201
hsa-mir-1305	0.572877
hsa-mir-548f-4	0
hsa-mir-1253	0.030263
hsa-mir-548o	0.0266124
hsa-mir-1266	0.0311265
hsa-mir-548h-4	0.0401274
hsa-mir-1275	0.0272529
hsa-mir-1278	0.0551474
hsa-mir-1537	0.024792
hsa-mir-1973	0.130082
hsa-mir-548s	0.260163
hsa-mir-3126	0.136796
hsa-mir-3135a	0.779145
hsa-mir-3148	0.0391577
hsa-mir-3150a	0.507346
hsa-mir-3154	0.0835007
hsa-mir-3158-2	0.0843087
hsa-mir-1260b	0.00207419
hsa-mir-3179-1	0.129458
hsa-mir-3179-2	0.129458
hsa-mir-3179-3	0.129458
hsa-mir-3202-1	0.840653
hsa-mir-3202-2	0.911364
hsa-mir-4301	0.0066538
hsa-mir-4307	0.456337
hsa-mir-4313	0.686506
hsa-mir-4259	0.0544661
hsa-mir-4255	0.0653507
hsa-mir-4329	0.00135662
hsa-mir-3617	0.0181088
hsa-mir-3655	0.0938991
hsa-mir-3658	0.00828993
hsa-mir-3667	0.149224
hsa-mir-3669	0.407548
hsa-mir-3684	0.0546306
hsa-mir-3685	0.0425474
hsa-mir-3687	0.0771435
hsa-mir-3714	0.0897667
hsa-mir-3926-1	0.990053
hsa-mir-1254-2	0.415789
hsa-mir-4417	0.220702
hsa-mir-4418	0.027853
hsa-mir-4419a	0.485176
hsa-mir-378f	0.0948493
hsa-mir-4430	0.727464
hsa-mir-4455	0.0666522
hsa-mir-4463	0.00287729
hsa-mir-4475	0.0288184
hsa-mir-4495	0.118849
hsa-mir-4503	0.0458756
hsa-mir-1269b	0.0203025
hsa-mir-4525	0.598098
hsa-mir-3974	0.0175926
hsa-mir-4634	0.434742
hsa-mir-4654	0.319948
hsa-mir-4677	0.0317289
hsa-mir-4678	0.0637364
hsa-mir-4685	0.117764
hsa-mir-4698	0.0821882
hsa-mir-4699	0.0199373
hsa-mir-4705	0.17651
hsa-mir-4708	0.125438
hsa-mir-4520b	0.0362631
hsa-mir-3064	0.507291
hsa-mir-4742	0.248643
hsa-mir-371b	0.0207456
hsa-mir-4785	0.0781632
hsa-mir-5002	0.00290585
hsa-mir-5694	0.0361908
hsa-mir-5700	0.641225
hsa-mir-6090	0.236471
hsa-mir-6126	0.0519493
hsa-mir-6729	0.0810235
hsa-mir-6734	0.104508
hsa-mir-6754	0.997796
hsa-mir-6776	0
hsa-mir-6791	0.259333
hsa-mir-6825	0.623249
hsa-mir-6833	0.675883
hsa-mir-6852	0.00271507
hsa-mir-6860	0.331535
hsa-mir-6874	0.0625811
hsa-mir-6875	0.0739658
hsa-mir-6876	0.151129
hsa-mir-486-2	0.0852709
hsa-mir-7703	0.0226079
hsa-mir-7705	0.635382
hsa-mir-4433b	0.268576
hsa-mir-7851	0.40147
hsa-mir-8062	0.0359412
hsa-mir-8063	0.125067
hsa-mir-8072	0.197795
hsa-mir-8084	0.0283432
hsa-mir-8088	0.0225372
