# Supplementary material for: MicroRNA Profiling in Cartilage Ageing
Source: Int J Genomics. 2017 Aug 14;2017:2713725. doi: 10.1155/2017/2713725 (PMC5584353; doi:10.1155/2017/2713725)
Supplement: Supplementary file 3 [file 2713725.f3.xlsx]

## Sheet: selection 2 no 9
miR	logFC.O_Y	FDR
hsa-miR-486-5p	5.948	6.23958e-05
hsa-miR-6780a-5p	-0.967	0.0383937
hsa-miR-5010-5p	-1.19733	0.0320764
hsa-miR-6774-5p	-1.41633	0.0285502
hsa-miR-6805-5p	-1.494	0.0456707
hsa-miR-4428	-1.692	0.0320764
hsa-miR-4716-3p	-1.78467	0.0313189
hsa-miR-6795-5p	-1.82767	0.0313189
hsa-miR-6833-5p	-1.864	0.0492623
hsa-miR-6875-5p	-3.16333	0.00317925
hsa-miR-7111-5p	-3.25733	0.0255474
hsa-miR-1273h-5p	-3.33933	0.0479734
hsa-miR-150-5p	-3.605	0.0320764
hsa-miR-1273d	-3.609	0.0255474
hsa-miR-5585-3p	-3.631	0.0255474
hsa-miR-6824-5p	-3.91733	0.0320764
hsa-miR-378i	-4.07533	0.0479734
hsa-miR-422a	-4.09833	0.0492623
hsa-miR-489-3p	-4.12333	0.0313189
hsa-miR-1273f	-4.21367	0.0280086
hsa-miR-708-5p	-5.573	0.0182457
hsa-miR-126-3p	-7.43733	0.0280086

## Sheet: selection 3 no 7,8,10
miR	logFC.O_Y	FDR
hsa-miR-486-5p	5.3	0.00200309
hsa-miR-1825	3.31833	0.00458058
hsa-miR-940	3.22167	0.0218171
hsa-miR-4750-3p	2.87167	0.0212976
hsa-miR-6800-3p	2.84167	0.0128607
hsa-miR-3613-5p	2.76333	0.0222251
hsa-miR-1234-3p	2.74833	0.018247
hsa-miR-1281	2.64	0.0128607
hsa-mir-6776	2.62833	0.0255756
hsa-miR-1228-3p	2.62667	0.025479
hsa-miR-8075	2.52333	0.00200309
hsa-miR-4279	2.41833	0.018247
hsa-miR-4749-3p	2.29833	0.00154011
hsa-miR-3157-3p	2.18167	0.0186331
hsa-miR-6796-3p	2.07833	0.0398651
hsa-miR-4274	2.045	0.0107871
hsa-mir-320e	1.99667	0.00240201
hsa-mir-6722	1.72333	0.018247
hsa-miR-6793-3p	1.67	0.0142292
hsa-miR-6732-5p	1.63167	0.00200309
hsa-miR-4433-5p	1.62333	0.0346612
hsa-mir-550a-1	1.61	0.0128607
hsa-mir-550a-2	1.61	0.0128607
hsa-mir-550a-3	1.61	0.0128607
hsa-miR-6892-3p	1.29833	0.00347394
hsa-miR-1273g-3p	1.125	0.0240202
hsa-miR-6766-3p	1.01	0.0386861
hsa-miR-6715a-3p	0.996667	0.0400736
hsa-mir-3924	0.846667	0.0221298
hsa-mir-371b	0.833333	0.00852573
hsa-miR-6826-3p	0.741667	0.0308281
hsa-mir-4804	0.673333	0.0216371
hsa-miR-4735-3p	0.633333	0.0409993
hsa-let-7f-1-3p	0.621667	0.0493553
hsa-miR-129-2-3p	0.606667	0.020075
hsa-mir-4762	0.591667	0.0383256
hsa-miR-520c-3p	0.591667	0.0210534
hsa-miR-6729-3p	0.571667	0.0186331
hsa-miR-4720-3p	0.526667	0.038517
hsa-mir-1294	0.516667	0.0290123
hsa-miR-1224-3p	0.51	0.0255756
hsa-miR-1277-3p	0.508333	0.0386861
hsa-mir-4677	0.48	0.0279206
hsa-mir-3118-1	0.426667	0.0320246
hsa-miR-548d-3p	0.411667	0.0373706
hsa-mir-300	0.401667	0.0442543
hsa-miR-652-5p	-0.675	0.0407834
hsa-mir-4284	-0.735	0.0362126
hsa-mir-6825	-1.03333	0.0230148
hsa-mir-494	-1.055	0.00412558
hsa-miR-1292-5p	-1.07833	0.0233464
hsa-mir-487b	-1.11833	0.0357017
hsa-miR-296-3p	-1.23667	0.0177683
hsa-miR-6768-5p	-1.27333	0.0128607
hsa-miR-1254	-1.28833	0.03704
hsa-miR-3124-5p	-1.32	0.0234077
hsa-miR-3195	-1.35333	0.0373706
hsa-miR-5698	-1.37167	0.0125374
hsa-miR-5010-5p	-1.44333	0.0139559
hsa-miR-4738-3p	-1.50833	0.0218171
hsa-miR-658	-1.55667	0.0255756
hsa-miR-4788	-1.55667	0.0408464
hsa-miR-4442	-1.64167	0.0383256
hsa-miR-6769a-5p	-1.64667	0.00836294
hsa-miR-4327	-1.74833	0.0183808
hsa-miR-4716-3p	-1.78	0.0326819
hsa-miR-4710	-1.78833	0.038517
hsa-miR-936	-1.835	0.0483123
hsa-miR-6865-5p	-1.84833	0.0130674
hsa-miR-4428	-1.93667	0.0139559
hsa-miR-497-5p	-2.04167	0.0398651
hsa-miR-6887-5p	-2.06667	0.00764604
hsa-miR-6833-5p	-2.08333	0.0290123
hsa-miR-29b-1-5p	-2.085	0.0400406
hsa-miR-6831-5p	-2.14	0.00367044
hsa-miR-4669	-2.24	0.0271984
hsa-miR-6795-5p	-2.27167	0.00200309
hsa-miR-4685-5p	-2.31167	0.0187323
hsa-miR-135a-3p	-2.36667	0.0355758
hsa-miR-3607-5p	-2.37167	0.0425639
hsa-miR-331-3p	-2.38333	0.0383256
hsa-miR-6830-5p	-2.45833	0.0255756
hsa-miR-4655-5p	-2.46	0.0386861
hsa-miR-675-5p	-2.505	0.00323011
hsa-miR-6086	-2.51333	0.0223678
hsa-miR-4498	-2.555	0.00804889
hsa-let-7b-5p	-2.57333	0.0487388
hsa-miR-6870-5p	-2.68833	0.00639664
hsa-mir-1248	-2.75167	0.00819951
hsa-miR-200c-3p	-2.79833	0.0255756
hsa-miR-424-3p	-2.86	0.0350225
hsa-miR-6806-5p	-2.86333	0.00200309
hsa-miR-532-5p	-2.875	0.0425418
hsa-miR-4656	-2.885	0.0346612
hsa-miR-4786-3p	-2.89	0.0293483
hsa-miR-6825-5p	-2.90333	0.0315539
hsa-miR-28-3p	-2.905	0.00764604
hsa-miR-642b-3p	-2.98	0.0383256
hsa-miR-7109-5p	-2.98833	0.0149131
hsa-miR-493-3p	-2.99	0.020075
hsa-miR-6880-5p	-3.015	0.0120359
hsa-miR-663b	-3.02333	0.0167041
hsa-miR-4284	-3.03833	0.0331924
hsa-miR-192-5p	-3.04833	0.0300859
hsa-miR-6757-5p	-3.08667	0.0415213
hsa-mir-3687	-3.12167	0.0223678
hsa-miR-7846-3p	-3.16333	0.0216371
hsa-miR-4732-5p	-3.175	0.0105135
hsa-miR-6836-5p	-3.18333	0.020075
hsa-miR-4298	-3.23167	0.0487388
hsa-miR-1271-5p	-3.32333	0.0210534
hsa-miR-30e-5p	-3.335	0.0487388
hsa-miR-6875-5p	-3.34	0.00175382
hsa-miR-342-5p	-3.35333	0.0226546
hsa-miR-1247-3p	-3.39	0.0142292
hsa-miR-1273h-5p	-3.48667	0.0350225
hsa-miR-1972	-3.505	0.0112653
hsa-miR-6746-5p	-3.52833	0.00819951
hsa-miR-6797-5p	-3.59167	0.00640176
hsa-miR-4485	-3.61667	0.00347394
hsa-miR-642a-3p	-3.64167	0.0117393
hsa-miR-500a-5p	-3.69167	0.00144198
hsa-miR-324-5p	-3.69333	0.0387509
hsa-miR-409-3p	-3.71167	0.0308281
hsa-miR-6778-5p	-3.725	0.038517
hsa-miR-370-3p	-3.76667	4.51564e-05
hsa-miR-629-5p	-3.80667	0.000774021
hsa-miR-500a-3p	-3.81833	0.00508835
hsa-miR-1273d	-3.82833	0.00819951
hsa-miR-5006-5p	-3.84333	0.00819951
hsa-miR-378d	-3.87	0.0102401
hsa-miR-8073	-3.96	0.00154011
hsa-miR-193a-3p	-3.96833	0.00200309
hsa-miR-452-5p	-3.97167	0.0383256
hsa-miR-3175	-3.99667	0.00836294
hsa-miR-3135b	-4.04833	0.00053928
hsa-miR-6819-5p	-4.05	0.021126
hsa-miR-5739	-4.05667	0.00200309
hsa-miR-501-3p	-4.10167	0.000989025
hsa-miR-4299	-4.15833	0.000550945
hsa-miR-27b-5p	-4.16	0.00556362
hsa-miR-664b-5p	-4.16167	0.0101323
hsa-miR-4269	-4.195	0.00275858
hsa-miR-652-3p	-4.21667	0.00764604
hsa-miR-1290	-4.22167	0.0183035
hsa-miR-196b-5p	-4.225	0.00225291
hsa-miR-5585-3p	-4.25167	0.00124477
hsa-miR-483-5p	-4.29333	0.00347394
hsa-miR-7111-5p	-4.30333	0.000550945
hsa-miR-154-5p	-4.35667	0.000550945
hsa-miR-24-2-5p	-4.38167	0.00200309
hsa-miR-489-3p	-4.41	0.0204478
hsa-miR-214-5p	-4.46167	0.000572541
hsa-miR-130b-3p	-4.49	0.00176241
hsa-miR-4667-5p	-4.495	0.00675636
hsa-miR-1973	-4.49833	0.000240794
hsa-miR-337-5p	-4.58833	0.0028843
hsa-miR-1273f	-4.605	0.0128607
hsa-miR-3609	-4.63667	0.00328175
hsa-miR-4728-5p	-4.655	0.0290123
hsa-miR-21-5p	-4.67667	0.0383256
hsa-miR-619-5p	-4.77833	0.0373706
hsa-miR-494-3p	-4.78333	0.0142292
hsa-miR-3687	-4.825	0.00830698
hsa-miR-150-5p	-5.03167	0.00124477
hsa-miR-34a-5p	-5.055	0.00182941
hsa-miR-130a-3p	-5.08833	0.00428592
hsa-miR-487b-3p	-5.155	0.0028843
hsa-miR-378i	-5.17	0.000572541
hsa-miR-382-5p	-5.22	0.00675636
hsa-miR-378f	-5.23333	0.00137032
hsa-miR-432-5p	-5.23667	0.00511915
hsa-miR-422a	-5.285	0.00144198
hsa-miR-4417	-5.345	0.00830698
hsa-miR-379-5p	-5.38167	0.00200309
hsa-miR-181b-5p	-5.405	0.00790467
hsa-miR-196a-5p	-5.52667	0.0308281
hsa-miR-31-5p	-5.64333	0.018247
hsa-miR-378a-3p	-5.74167	0.0217088
hsa-miR-376c-3p	-5.75667	0.00200309
hsa-miR-146b-5p	-6.10167	0.0140193
hsa-miR-708-5p	-6.20833	0.00268288
hsa-miR-1246	-6.285	0.0102401
hsa-miR-378c	-6.48667	0.000349161
hsa-miR-181a-5p	-6.91	0.00211951
hsa-miR-146a-5p	-7.22833	0.000145637
hsa-miR-145-5p	-8.12167	0.00229115
hsa-miR-143-3p	-9.37	5.22922e-05
hsa-miR-126-3p	-9.39	5.22922e-05

## Sheet: selection 4 no 9,11,12
miR	logFC.O_Y	FDR
hsa-miR-486-5p	5.97667	0.00143432
hsa-mir-210	2.16	0.0248506
hsa-miR-4521	1.93833	0.0357276
hsa-let-7a-1	0.926667	0.0357276
hsa-miR-423-5p	0.816667	0.0248506
hsa-miR-6795-5p	-1.33167	0.0248506
hsa-miR-6774-5p	-1.415	0.0389324
hsa-miR-7111-5p	-2.51	0.0357276
hsa-miR-6824-5p	-2.76333	0.0339854
hsa-miR-6875-5p	-2.92667	0.0248506
