# Supplementary material for: MicroRNA Profiling in Cartilage Ageing
Source: Int J Genomics. 2017 Aug 14;2017:2713725. doi: 10.1155/2017/2713725 (PMC5584353; doi:10.1155/2017/2713725)
Supplement: Supplementary file 4 [file 2713725.f4.xlsx]

## Sheet: target scan
ID	Symbol	Expr Fold Change	Source	Confidence	Symbol	Pathway	Tissue/Cell Line
hsa-miR-126-3p	miR-126a-3p (and other miRNAs w/seed CGUACCG)	-7.81	TarBase,miRecords	Experimentally Observed	VCAM1	Agranulocyte Adhesion and Diapedesis,Atherosclerosis Signaling,Glucocorticoid Receptor Signaling,Granulocyte Adhesion and Diapedesis,Hepatic Fibrosis / Hepatic Stellate Cell Activation,HMGB1 Signaling,IL-15 Signaling,IL-8 Signaling,Leukocyte Extravasation Signaling,Lymphotoxin β Receptor Signaling,Role of Macrophages, Fibroblasts and Endothelial Cells in Rheumatoid Arthritis	chondrocyte
hsa-miR-126-3p	miR-126a-3p (and other miRNAs w/seed CGUACCG)	-7.81	miRecords	Experimentally Observed	VEGFA	Amyotrophic Lateral Sclerosis Signaling,Axonal Guidance Signaling,Bladder Cancer Signaling,Clathrin-mediated Endocytosis Signaling,Colorectal Cancer Metastasis Signaling,Corticotropin Releasing Hormone Signaling,EIF2 Signaling,eNOS Signaling,Ephrin Receptor Signaling,Hepatic Fibrosis / Hepatic Stellate Cell Activation,HIF1α Signaling,Hypoxia Signaling in the Cardiovascular System,IL-6 Signaling,I…	chondrocyte
hsa-miR-1273f	miR-1273f (miRNAs w/seed GAGAUGG)	-4.098	TargetScan Human	High (predicted)	IL18	Acute Phase Response Signaling,Agranulocyte Adhesion and Diapedesis,Altered T Cell and B Cell Signaling in Rheumatoid Arthritis,Atherosclerosis Signaling,Cholecystokinin/Gastrin-mediated Signaling,Communication between Innate and Adaptive Immune Cells,Crosstalk between Dendritic Cells and Natural Killer Cells,Dendritic Cell Maturation,FXR/RXR Activation,Graft-versus-Host Disease Signaling,Granulo…	chondrocyte
hsa-miR-1273f	miR-1273f (miRNAs w/seed GAGAUGG)	-4.098	TargetScan Human	High (predicted)	SP7	Role of Osteoblasts, Osteoclasts and Chondrocytes in Rheumatoid Arthritis	chondrocyte
hsa-miR-150-5p	miR-150-5p (and other miRNAs w/seed CUCCCAA)	-3.908	TargetScan Human	High (predicted)	ADIPOR2	PPARα/RXRα Activation,Type II Diabetes Mellitus Signaling	chondrocyte
hsa-miR-150-5p	miR-150-5p (and other miRNAs w/seed CUCCCAA)	-3.908	TargetScan Human	High (predicted)	NPR3	cAMP-mediated signaling,G-Protein Coupled Receptor Signaling,Gαi Signaling	chondrocyte
hsa-miR-150-5p	miR-150-5p (and other miRNAs w/seed CUCCCAA)	-3.908	miRecords	Experimentally Observed	VEGFA	Amyotrophic Lateral Sclerosis Signaling,Axonal Guidance Signaling,Bladder Cancer Signaling,Clathrin-mediated Endocytosis Signaling,Colorectal Cancer Metastasis Signaling,Corticotropin Releasing Hormone Signaling,EIF2 Signaling,eNOS Signaling,Ephrin Receptor Signaling,Hepatic Fibrosis / Hepatic Stellate Cell Activation,HIF1α Signaling,Hypoxia Signaling in the Cardiovascular System,IL-6 Signaling,I…	chondrocyte
hsa-miR-6875-5p	miR-3126-5p (and other miRNAs w/seed GAGGGAC)	-3.133	TargetScan Human	High (predicted)	CD44	Glioma Invasiveness Signaling,HIPPO signaling,Leukocyte Extravasation Signaling,Ovarian Cancer Signaling,Rac Signaling,RhoGDI Signaling,Wnt/β-catenin Signaling	chondrocyte
hsa-miR-6875-5p	miR-3126-5p (and other miRNAs w/seed GAGGGAC)	-3.133	TargetScan Human	High (predicted)	ETV7		chondrocyte
hsa-miR-6875-5p	miR-3126-5p (and other miRNAs w/seed GAGGGAC)	-3.133	TargetScan Human	High (predicted)	FOSL2		chondrocyte
hsa-miR-422a	miR-378a-3p (and other miRNAs w/seed CUGGACU)	-4.142	TargetScan Human	High (predicted)	BMP2	Adipogenesis pathway,Axonal Guidance Signaling,Basal Cell Carcinoma Signaling,BMP signaling pathway,Cardiomyocyte Differentiation via BMP Receptors,Factors Promoting Cardiogenesis in Vertebrates,Human Embryonic Stem Cell Pluripotency,ILK Signaling,Molecular Mechanisms of Cancer,NF-κB Signaling,RAR Activation,Retinoate Biosynthesis I,Role of NANOG in Mammalian Embryonic Stem Cell Pluripotency,Role…	chondrocyte
hsa-miR-422a	miR-378a-3p (and other miRNAs w/seed CUGGACU)	-4.142	Ingenuity Expert Findings	Experimentally Observed	IGF1R	Cardiac Hypertrophy Signaling,EIF2 Signaling,Estrogen-Dependent Breast Cancer Signaling,Glioblastoma Multiforme Signaling,Glioma Signaling,Growth Hormone Signaling,Hepatic Fibrosis / Hepatic Stellate Cell Activation,Huntington's Disease Signaling,IGF-1 Signaling,Myc Mediated Apoptosis Signaling,NF-κB Signaling,PTEN Signaling,RhoA Signaling,Role of NFAT in Cardiac Hypertrophy,STAT3 Pathway,Synapti…	chondrocyte
hsa-miR-422a	miR-378a-3p (and other miRNAs w/seed CUGGACU)	-4.142	TargetScan Human	High (predicted)	SOST	Role of Macrophages, Fibroblasts and Endothelial Cells in Rheumatoid Arthritis,Role of Osteoblasts, Osteoclasts and Chondrocytes in Rheumatoid Arthritis	chondrocyte
hsa-miR-5010-5p	miR-4525 (and other miRNAs w/seed GGGGGAU)	-1.29	TargetScan Human	High (predicted)	FOSL2		chondrocyte
hsa-miR-5010-5p	miR-4525 (and other miRNAs w/seed GGGGGAU)	-1.29	TargetScan Human	High (predicted)	IHH	Molecular Mechanisms of Cancer,Protein Kinase A Signaling	chondrocyte
hsa-miR-5010-5p	miR-4525 (and other miRNAs w/seed GGGGGAU)	-1.29	TargetScan Human	High (predicted)	MGP		chondrocyte
hsa-miR-5010-5p	miR-4525 (and other miRNAs w/seed GGGGGAU)	-1.29	TargetScan Human	High (predicted)	MMP13	Agranulocyte Adhesion and Diapedesis,Atherosclerosis Signaling,Axonal Guidance Signaling,Bladder Cancer Signaling,Colorectal Cancer Metastasis Signaling,Granulocyte Adhesion and Diapedesis,Hepatic Fibrosis / Hepatic Stellate Cell Activation,HIF1α Signaling,Inhibition of Matrix Metalloproteases,Leukocyte Extravasation Signaling,Oncostatin M Signaling,Role of IL-17A in Arthritis,Role of IL-17F in A…	chondrocyte
hsa-miR-5010-5p	miR-4525 (and other miRNAs w/seed GGGGGAU)	-1.29	TargetScan Human	High (predicted)	NOS2	Citrulline-Nitric Oxide Cycle,Colorectal Cancer Metastasis Signaling,Corticotropin Releasing Hormone Signaling,Endothelin-1 Signaling,Glucocorticoid Receptor Signaling,HIF1α Signaling,IL-12 Signaling and Production in Macrophages,IL-17 Signaling,ILK Signaling,iNOS Signaling,LXR/RXR Activation,MIF Regulation of Innate Immunity,MSP-RON Signaling Pathway,Production of Nitric Oxide and Reactive Oxyge…	chondrocyte
hsa-miR-4716-3p	miR-4716-3p (and other miRNAs w/seed AGGGGGA)	-1.74	TargetScan Human	High (predicted)	FGF18	Actin Cytoskeleton Signaling,Bladder Cancer Signaling,Clathrin-mediated Endocytosis Signaling,FGF Signaling,Regulation of the Epithelial-Mesenchymal Transition Pathway	chondrocyte
hsa-miR-4716-3p	miR-4716-3p (and other miRNAs w/seed AGGGGGA)	-1.74	TargetScan Human	High (predicted)	GRN		chondrocyte
hsa-miR-4716-3p	miR-4716-3p (and other miRNAs w/seed AGGGGGA)	-1.74	TargetScan Human	High (predicted)	IL11	Hematopoiesis from Pluripotent Stem Cells,Hepatic Cholestasis,HMGB1 Signaling,Role of IL-17F in Allergic Inflammatory Airway Diseases,Role of NFAT in Cardiac Hypertrophy,Role of Osteoblasts, Osteoclasts and Chondrocytes in Rheumatoid Arthritis,Role of Pattern Recognition Receptors in Recognition of Bacteria and Viruses	chondrocyte
hsa-miR-4716-3p	miR-4716-3p (and other miRNAs w/seed AGGGGGA)	-1.74	TargetScan Human	High (predicted)	MGP		chondrocyte
hsa-miR-4716-3p	miR-4716-3p (and other miRNAs w/seed AGGGGGA)	-1.74	TargetScan Human	High (predicted)	NACC1		chondrocyte
hsa-miR-7111-5p	miR-4723-5p (and other miRNAs w/seed GGGGGAG)	-3.407	TargetScan Human	High (predicted)	AKT1	14-3-3-mediated Signaling,Acute Myeloid Leukemia Signaling,Acute Phase Response Signaling,Adipogenesis pathway,AMPK Signaling,Amyloid Processing,Angiopoietin Signaling,Axonal Guidance Signaling,B Cell Receptor Signaling,Cancer Drug Resistance By Drug Efflux,Cardiac Hypertrophy Signaling,CD28 Signaling in T Helper Cells,Ceramide Signaling,Chronic Myeloid Leukemia Signaling,CNTF Signaling,Colorecta…	chondrocyte
hsa-miR-7111-5p	miR-4723-5p (and other miRNAs w/seed GGGGGAG)	-3.407	TargetScan Human	High (predicted)	CALM1 (includes others)	Androgen Signaling,B Cell Receptor Signaling,Breast Cancer Regulation by Stathmin1,Calcium Signaling,Calcium-induced T Lymphocyte Apoptosis,cAMP-mediated signaling,Cardiac Hypertrophy Signaling,CCR3 Signaling in Eosinophils,CCR5 Signaling in Macrophages,CD28 Signaling in T Helper Cells,Cellular Effects of Sildenafil (Viagra),Chemokine Signaling,Corticotropin Releasing Hormone Signaling,CREB Signa…	chondrocyte
hsa-miR-7111-5p	miR-4723-5p (and other miRNAs w/seed GGGGGAG)	-3.407	TargetScan Human	High (predicted)	FGF18	Actin Cytoskeleton Signaling,Bladder Cancer Signaling,Clathrin-mediated Endocytosis Signaling,FGF Signaling,Regulation of the Epithelial-Mesenchymal Transition Pathway	chondrocyte
hsa-miR-7111-5p	miR-4723-5p (and other miRNAs w/seed GGGGGAG)	-3.407	TargetScan Human	High (predicted)	FOSL2		chondrocyte
hsa-miR-7111-5p	miR-4723-5p (and other miRNAs w/seed GGGGGAG)	-3.407	TargetScan Human	High (predicted)	IHH	Molecular Mechanisms of Cancer,Protein Kinase A Signaling	chondrocyte
hsa-miR-7111-5p	miR-4723-5p (and other miRNAs w/seed GGGGGAG)	-3.407	TargetScan Human	High (predicted)	IL11	Hematopoiesis from Pluripotent Stem Cells,Hepatic Cholestasis,HMGB1 Signaling,Role of IL-17F in Allergic Inflammatory Airway Diseases,Role of NFAT in Cardiac Hypertrophy,Role of Osteoblasts, Osteoclasts and Chondrocytes in Rheumatoid Arthritis,Role of Pattern Recognition Receptors in Recognition of Bacteria and Viruses	chondrocyte
hsa-miR-7111-5p	miR-4723-5p (and other miRNAs w/seed GGGGGAG)	-3.407	TargetScan Human	High (predicted)	KCNJ11	Dopamine-DARPP32 Feedback in cAMP Signaling,Type II Diabetes Mellitus Signaling	chondrocyte
hsa-miR-7111-5p	miR-4723-5p (and other miRNAs w/seed GGGGGAG)	-3.407	TargetScan Human	High (predicted)	NACC1		chondrocyte
hsa-miR-7111-5p	miR-4723-5p (and other miRNAs w/seed GGGGGAG)	-3.407	TargetScan Human	High (predicted)	PTHLH		chondrocyte
hsa-miR-7111-5p	miR-4723-5p (and other miRNAs w/seed GGGGGAG)	-3.407	TargetScan Human	High (predicted)	VDR	TGF-β Signaling,VDR/RXR Activation	chondrocyte
hsa-miR-5585-3p	miR-5585-3p (miRNAs w/seed UGAAUAG)	-3.73	TargetScan Human	High (predicted)	CALM1 (includes others)	Androgen Signaling,B Cell Receptor Signaling,Breast Cancer Regulation by Stathmin1,Calcium Signaling,Calcium-induced T Lymphocyte Apoptosis,cAMP-mediated signaling,Cardiac Hypertrophy Signaling,CCR3 Signaling in Eosinophils,CCR5 Signaling in Macrophages,CD28 Signaling in T Helper Cells,Cellular Effects of Sildenafil (Viagra),Chemokine Signaling,Corticotropin Releasing Hormone Signaling,CREB Signa…	chondrocyte
hsa-miR-5585-3p	miR-5585-3p (miRNAs w/seed UGAAUAG)	-3.73	TargetScan Human	High (predicted)	COL10A1	Atherosclerosis Signaling,Dendritic Cell Maturation,Hepatic Fibrosis / Hepatic Stellate Cell Activation,Intrinsic Prothrombin Activation Pathway	chondrocyte
hsa-miR-5585-3p	miR-5585-3p (miRNAs w/seed UGAAUAG)	-3.73	TargetScan Human	High (predicted)	DYM		chondrocyte
hsa-miR-6795-5p	miR-6795-5p (and other miRNAs w/seed GGGGGGA)	-1.802	TargetScan Human	High (predicted)	CALM1 (includes others)	Androgen Signaling,B Cell Receptor Signaling,Breast Cancer Regulation by Stathmin1,Calcium Signaling,Calcium-induced T Lymphocyte Apoptosis,cAMP-mediated signaling,Cardiac Hypertrophy Signaling,CCR3 Signaling in Eosinophils,CCR5 Signaling in Macrophages,CD28 Signaling in T Helper Cells,Cellular Effects of Sildenafil (Viagra),Chemokine Signaling,Corticotropin Releasing Hormone Signaling,CREB Signa…	chondrocyte
hsa-miR-6795-5p	miR-6795-5p (and other miRNAs w/seed GGGGGGA)	-1.802	TargetScan Human	High (predicted)	CITED2	PPAR Signaling,RAR Activation,Xenobiotic Metabolism Signaling	chondrocyte
hsa-miR-6795-5p	miR-6795-5p (and other miRNAs w/seed GGGGGGA)	-1.802	TargetScan Human	High (predicted)	GPR68		chondrocyte
hsa-miR-6795-5p	miR-6795-5p (and other miRNAs w/seed GGGGGGA)	-1.802	TargetScan Human	High (predicted)	INSR	AMPK Signaling,Caveolar-mediated Endocytosis Signaling,EIF2 Signaling,G Protein Signaling Mediated by Tubby,Hepatic Cholestasis,Insulin Receptor Signaling,Maturity Onset Diabetes of Young (MODY) Signaling,mTOR Signaling,NF-κB Signaling,PPAR Signaling,PPARα/RXRα Activation,PTEN Signaling,PXR/RXR Activation,STAT3 Pathway,Type II Diabetes Mellitus Signaling	chondrocyte
hsa-miR-6795-5p	miR-6795-5p (and other miRNAs w/seed GGGGGGA)	-1.802	TargetScan Human	High (predicted)	NACC1		chondrocyte
hsa-miR-6795-5p	miR-6795-5p (and other miRNAs w/seed GGGGGGA)	-1.802	TargetScan Human	High (predicted)	TNFRSF11A	NF-κB Signaling,PTEN Signaling,RANK Signaling in Osteoclasts,Role of Osteoblasts, Osteoclasts and Chondrocytes in Rheumatoid Arthritis,STAT3 Pathway	chondrocyte
hsa-miR-6830-5p	miR-6830-5p (miRNAs w/seed CAAGGAA)	-2.163	TargetScan Human	High (predicted)	BDNF	Axonal Guidance Signaling,CDK5 Signaling,Corticotropin Releasing Hormone Signaling,Human Embryonic Stem Cell Pluripotency,Huntington's Disease Signaling,Neuropathic Pain Signaling In Dorsal Horn Neurons,Neurotrophin/TRK Signaling,PEDF Signaling,Thyroid Cancer Signaling	chondrocyte
hsa-miR-6830-5p	miR-6830-5p (miRNAs w/seed CAAGGAA)	-2.163	TargetScan Human	High (predicted)	VCAM1	Agranulocyte Adhesion and Diapedesis,Atherosclerosis Signaling,Glucocorticoid Receptor Signaling,Granulocyte Adhesion and Diapedesis,Hepatic Fibrosis / Hepatic Stellate Cell Activation,HMGB1 Signaling,IL-15 Signaling,IL-8 Signaling,Leukocyte Extravasation Signaling,Lymphotoxin β Receptor Signaling,Role of Macrophages, Fibroblasts and Endothelial Cells in Rheumatoid Arthritis	chondrocyte

## Sheet: gene ontology
Category	ID	Name	p-value	q-value Bonferroni	q-value FDR B&H	q-value FDR B&Y	Hit Count in Query List	Hit Count in Genome	Hit in Query List
GO: Molecular Function	GO:0005102	receptor binding	1.027e-10	3.123e-08	3.123e-08	1.966e-07	17	1607	IL11,BMP2,IL18,IGF1R,CALM1,INSR,CD44,GRN,IHH,MMP13,NOS2,PTHLH,FGF18,BDNF,VCAM1,VDR,VEGFA
GO: Molecular Function	GO:0008083	growth factor activity	3.224e-07	9.802e-05	4.901e-05	0.0003086	6	166	IL11,BMP2,GRN,FGF18,BDNF,VEGFA
GO: Molecular Function	GO:0042562	hormone binding	1.151e-05	0.0035	0.001167	0.007345	4	83	NPR3,IGF1R,INSR,ADIPOR2
GO: Molecular Function	GO:0005125	cytokine activity	3.392e-05	0.01031	0.00212	0.01335	5	222	IL11,BMP2,IL18,GRN,VEGFA
GO: Molecular Function	GO:0043548	phosphatidylinositol 3-kinase binding	3.618e-05	0.011	0.00212	0.01335	3	38	IGF1R,CALM1,INSR
GO: Molecular Function	GO:0043559	insulin binding	4.184e-05	0.01272	0.00212	0.01335	2	6	IGF1R,INSR
GO: Molecular Function	GO:0017046	peptide hormone binding	6.037e-05	0.01835	0.002622	0.01651	3	45	NPR3,IGF1R,INSR
GO: Molecular Function	GO:0070851	growth factor receptor binding	9.742e-05	0.02962	0.003702	0.02331	4	143	IL11,CD44,FGF18,VEGFA
GO: Molecular Function	GO:0005126	cytokine receptor binding	0.0001202	0.03654	0.0038	0.02392	5	290	IL11,BMP2,CD44,BDNF,VEGFA
GO: Molecular Function	GO:0030235	nitric-oxide synthase regulator activity	0.000125	0.038	0.0038	0.02392	2	10	CALM1,AKT1
GO: Molecular Function	GO:0019211	phosphatase activator activity	0.0001526	0.04639	0.004217	0.02655	2	11	BMP2,CALM1
GO: Molecular Function	GO:0031994	insulin-like growth factor I binding	0.0001829	0.05561	0.004278	0.02693	2	12	IGF1R,INSR
GO: Molecular Function	GO:0043560	insulin receptor substrate binding	0.0001829	0.05561	0.004278	0.02693	2	12	IGF1R,INSR
GO: Molecular Function	GO:0048306	calcium-dependent protein binding	0.0002263	0.06878	0.004913	0.03093	3	70	MGP,CALM1,MMP13
GO: Molecular Function	GO:0099600	transmembrane receptor activity	0.0003687	0.1121	0.006595	0.04152	9	1386	NPR3,IGF1R,CALM1,GPR68,KCNJ11,INSR,CD44,TNFRSF11A,ADIPOR2
GO: Molecular Function	GO:0060089	molecular transducer activity	0.0003688	0.1121	0.006595	0.04152	10	1708	NPR3,IGF1R,CALM1,GPR68,KCNJ11,INSR,CD44,TNFRSF11A,ADIPOR2,VDR
GO: Molecular Function	GO:0004872	receptor activity	0.0003688	0.1121	0.006595	0.04152	10	1708	NPR3,IGF1R,CALM1,GPR68,KCNJ11,INSR,CD44,TNFRSF11A,ADIPOR2,VDR
GO: Molecular Function	GO:0050998	nitric-oxide synthase binding	0.0006335	0.1926	0.0107	0.06736	2	22	CALM1,NOS2
GO: Molecular Function	GO:0005520	insulin-like growth factor binding	0.00103	0.3131	0.01648	0.1038	2	28	IGF1R,INSR
GO: Molecular Function	GO:0001968	fibronectin binding	0.001431	0.4351	0.01918	0.1207	2	33	MMP13,VEGFA
GO: Molecular Function	GO:0038186	lithocholic acid receptor activity	0.001703	0.5178	0.01918	0.1207	1	1	VDR
GO: Molecular Function	GO:1902098	calcitriol binding	0.001703	0.5178	0.01918	0.1207	1	1	VDR
GO: Molecular Function	GO:0005009	insulin-activated receptor activity	0.001703	0.5178	0.01918	0.1207	1	1	INSR
GO: Molecular Function	GO:1902121	lithocholic acid binding	0.001703	0.5178	0.01918	0.1207	1	1	VDR
GO: Molecular Function	GO:0008434	calcitriol receptor activity	0.001703	0.5178	0.01918	0.1207	1	1	VDR
GO: Molecular Function	GO:0005142	interleukin-11 receptor binding	0.001703	0.5178	0.01918	0.1207	1	1	IL11
GO: Molecular Function	GO:0031405	lipoic acid binding	0.001703	0.5178	0.01918	0.1207	1	1	INSR
GO: Molecular Function	GO:0019838	growth factor binding	0.001777	0.5403	0.0193	0.1215	3	142	IGF1R,INSR,VEGFA
GO: Molecular Function	GO:0038023	signaling receptor activity	0.002262	0.6877	0.02311	0.1455	8	1436	NPR3,IGF1R,GPR68,INSR,CD44,TNFRSF11A,ADIPOR2,VDR
GO: Molecular Function	GO:0004871	signal transducer activity	0.002281	0.6933	0.02311	0.1455	9	1786	NPR3,IGF1R,GPR68,INSR,CD44,TNFRSF11A,ADIPOR2,VDR,VEGFA
GO: Molecular Function	GO:1902271	D3 vitamins binding	0.003398	1	0.02951	0.1858	1	2	VDR
GO: Molecular Function	GO:0097003	adipokinetic hormone receptor activity	0.003398	1	0.02951	0.1858	1	2	ADIPOR2
GO: Molecular Function	GO:0008147	structural constituent of bone	0.003398	1	0.02951	0.1858	1	2	MGP
GO: Molecular Function	GO:0005169	neurotrophin TRKB receptor binding	0.003398	1	0.02951	0.1858	1	2	BDNF
GO: Molecular Function	GO:0043183	vascular endothelial growth factor receptor 1 binding	0.003398	1	0.02951	0.1858	1	2	VEGFA
GO: Molecular Function	GO:0004713	protein tyrosine kinase activity	0.003591	1	0.02984	0.1879	3	182	IGF1R,INSR,FGF18
GO: Molecular Function	GO:0005160	transforming growth factor beta receptor binding	0.003657	1	0.02984	0.1879	2	53	BMP2,CD44
GO: Molecular Function	GO:0019901	protein kinase binding	0.00373	1	0.02984	0.1879	5	622	CALM1,INSR,CD44,AKT1,NOS2
GO: Molecular Function	GO:0070644	vitamin D response element binding	0.005093	1	0.03294	0.2074	1	3	VDR
GO: Molecular Function	GO:0038181	bile acid receptor activity	0.005093	1	0.03294	0.2074	1	3	VDR
GO: Molecular Function	GO:0055100	adiponectin binding	0.005093	1	0.03294	0.2074	1	3	ADIPOR2
GO: Molecular Function	GO:0031800	type 3 metabotropic glutamate receptor binding	0.005093	1	0.03294	0.2074	1	3	CALM1
GO: Molecular Function	GO:0031997	N-terminal myristoylation domain binding	0.005093	1	0.03294	0.2074	1	3	CALM1
GO: Molecular Function	GO:0043423	3-phosphoinositide-dependent protein kinase binding	0.005093	1	0.03294	0.2074	1	3	INSR
GO: Molecular Function	GO:0004517	nitric-oxide synthase activity	0.005093	1	0.03294	0.2074	1	3	NOS2
GO: Molecular Function	GO:0005010	insulin-like growth factor-activated receptor activity	0.005093	1	0.03294	0.2074	1	3	IGF1R
GO: Molecular Function	GO:0016941	natriuretic peptide receptor activity	0.005093	1	0.03294	0.2074	1	3	NPR3
GO: Molecular Function	GO:0004714	transmembrane receptor protein tyrosine kinase activity	0.005781	1	0.03591	0.2261	2	67	IGF1R,INSR
GO: Molecular Function	GO:0019900	kinase binding	0.005889	1	0.03591	0.2261	5	693	CALM1,INSR,CD44,AKT1,NOS2
GO: Molecular Function	GO:0005539	glycosaminoglycan binding	0.006013	1	0.03591	0.2261	3	219	SOST,CD44,VEGFA
GO: Molecular Function	GO:0004888	transmembrane signaling receptor activity	0.006025	1	0.03591	0.2261	7	1327	NPR3,IGF1R,GPR68,INSR,CD44,TNFRSF11A,ADIPOR2
GO: Molecular Function	GO:0005518	collagen binding	0.006648	1	0.0375	0.2361	2	72	CD44,MMP13
GO: Molecular Function	GO:0050693	LBD domain binding	0.006785	1	0.0375	0.2361	1	4	CITED2
GO: Molecular Function	GO:0051425	PTB domain binding	0.006785	1	0.0375	0.2361	1	4	INSR
GO: Molecular Function	GO:0034617	tetrahydrobiopterin binding	0.006785	1	0.0375	0.2361	1	4	NOS2
GO: Molecular Function	GO:0042802	identical protein binding	0.006989	1	0.03794	0.2389	7	1364	BMP2,NPR3,IGF1R,AKT1,NOS2,ADIPOR2,VEGFA
GO: Molecular Function	GO:0046332	SMAD binding	0.00757	1	0.04037	0.2542	2	77	CITED2,BMP2
GO: Molecular Function	GO:0031406	carboxylic acid binding	0.007734	1	0.04054	0.2552	3	240	INSR,NOS2,VDR
GO: Molecular Function	GO:0033293	monocarboxylic acid binding	0.007954	1	0.04054	0.2552	2	79	INSR,VDR
GO: Molecular Function	GO:0043177	organic acid binding	0.008002	1	0.04054	0.2552	3	243	INSR,NOS2,VDR
GO: Molecular Function	GO:0005111	type 2 fibroblast growth factor receptor binding	0.008474	1	0.04089	0.2574	1	5	FGF18
GO: Molecular Function	GO:0015272	ATP-activated inward rectifier potassium channel activity	0.008474	1	0.04089	0.2574	1	5	KCNJ11
GO: Molecular Function	GO:0005105	type 1 fibroblast growth factor receptor binding	0.008474	1	0.04089	0.2574	1	5	FGF18
GO: Molecular Function	GO:1901681	sulfur compound binding	0.00962	1	0.04509	0.2839	3	260	SOST,INSR,VEGFA
GO: Molecular Function	GO:0016773	phosphotransferase activity, alcohol group as acceptor	0.009648	1	0.04509	0.2839	5	781	IGF1R,CALM1,INSR,AKT1,FGF18
GO: Molecular Function	GO:0019208	phosphatase regulator activity	0.009789	1	0.04509	0.2839	2	88	BMP2,CALM1
GO: Molecular Function	GO:0017151	DEAD/H-box RNA helicase binding	0.01016	1	0.04542	0.286	1	6	SP7
GO: Molecular Function	GO:0008131	primary amine oxidase activity	0.01016	1	0.04542	0.286	1	6	VCAM1
GO: Molecular Function	GO:0019199	transmembrane receptor protein kinase activity	0.01044	1	0.04599	0.2896	2	91	IGF1R,INSR
GO: Biological Process	GO:0001501	skeletal system development	5.603e-14	1.466e-10	9.285e-11	7.843e-10	14	534	CITED2,BMP2,NPR3,COL10A1,DYM,MGP,GPR68,CD44,IHH,MMP13,PTHLH,FGF18,VDR,VEGFA
GO: Biological Process	GO:0042127	regulation of cell proliferation	7.096e-14	1.857e-10	9.285e-11	7.843e-10	20	1674	IL11,BMP2,NPR3,IL18,IGF1R,NACC1,FOSL2,INSR,CD44,AKT1,GRN,TNFRSF11A,IHH,NOS2,PTHLH,FGF18,BDNF,VCAM1,VDR,VEGFA
GO: Biological Process	GO:0001503	ossification	1.351e-12	3.536e-09	1.179e-09	9.957e-09	12	406	BMP2,SOST,COL10A1,MGP,AKT1,TNFRSF11A,IHH,MMP13,PTHLH,FGF18,SP7,VEGFA
GO: Biological Process	GO:0009719	response to endogenous stimulus	2.34e-12	6.125e-09	1.531e-09	1.293e-08	19	1743	CITED2,BMP2,SOST,IL18,IGF1R,CALM1,FOSL2,KCNJ11,INSR,CD44,AKT1,GRN,IHH,MMP13,FGF18,ADIPOR2,BDNF,VCAM1,VDR
GO: Biological Process	GO:0008284	positive regulation of cell proliferation	5.765e-12	1.509e-08	3.017e-09	2.549e-08	15	927	IL11,BMP2,IL18,IGF1R,NACC1,FOSL2,INSR,AKT1,GRN,TNFRSF11A,IHH,PTHLH,FGF18,VCAM1,VEGFA
GO: Biological Process	GO:0033993	response to lipid	2.379e-11	6.225e-08	1.035e-08	8.742e-08	15	1024	CITED2,IL18,CALM1,FOSL2,KCNJ11,INSR,AKT1,GRN,TNFRSF11A,IHH,MMP13,NOS2,BDNF,VCAM1,VDR
GO: Biological Process	GO:0009725	response to hormone	2.768e-11	7.244e-08	1.035e-08	8.742e-08	15	1035	CITED2,SOST,IL18,IGF1R,CALM1,FOSL2,KCNJ11,INSR,AKT1,GRN,IHH,MMP13,ADIPOR2,BDNF,VDR
GO: Biological Process	GO:0014070	response to organic cyclic compound	3.259e-11	8.53e-08	1.066e-08	9.007e-08	15	1047	CITED2,BMP2,IL18,CALM1,FOSL2,KCNJ11,INSR,AKT1,GRN,IHH,MMP13,NOS2,BDNF,VCAM1,VDR
GO: Biological Process	GO:0009887	animal organ morphogenesis	9.574e-11	2.506e-07	2.784e-08	2.352e-07	15	1130	CITED2,BMP2,COL10A1,IGF1R,MGP,ETV7,INSR,CD44,IHH,MMP13,PTHLH,FGF18,BDNF,VDR,VEGFA
GO: Biological Process	GO:0009891	positive regulation of biosynthetic process	2.368e-10	6.197e-07	6.197e-08	5.235e-07	18	1967	CITED2,IL11,BMP2,SOST,IL18,IGF1R,CALM1,FOSL2,INSR,AKT1,TNFRSF11A,IHH,NOS2,PTHLH,BDNF,SP7,VDR,VEGFA
GO: Biological Process	GO:0042592	homeostatic process	4.944e-10	1.294e-06	1.176e-07	9.935e-07	17	1773	CITED2,IL18,IGF1R,CALM1,GPR68,KCNJ11,INSR,CD44,AKT1,TNFRSF11A,IHH,NOS2,PTHLH,ADIPOR2,VCAM1,VDR,VEGFA
GO: Biological Process	GO:0045935	positive regulation of nucleobase-containing compound metabolic process	8.813e-10	2.306e-06	1.922e-07	1.623e-06	17	1840	CITED2,IL11,BMP2,SOST,IGF1R,CALM1,FOSL2,INSR,AKT1,TNFRSF11A,IHH,NOS2,PTHLH,BDNF,SP7,VDR,VEGFA
GO: Biological Process	GO:0060348	bone development	9.922e-10	2.597e-06	1.997e-07	1.687e-06	8	195	CITED2,BMP2,COL10A1,DYM,GPR68,MMP13,PTHLH,FGF18
GO: Biological Process	GO:0051216	cartilage development	1.12e-09	2.93e-06	2.011e-07	1.699e-06	8	198	BMP2,COL10A1,MGP,CD44,IHH,MMP13,PTHLH,FGF18
GO: Biological Process	GO:0045937	positive regulation of phosphate metabolic process	1.229e-09	3.217e-06	2.011e-07	1.699e-06	14	1127	IL11,BMP2,IL18,IGF1R,CALM1,INSR,CD44,AKT1,TNFRSF11A,NOS2,PTHLH,FGF18,BDNF,VEGFA
GO: Biological Process	GO:0010562	positive regulation of phosphorus metabolic process	1.229e-09	3.217e-06	2.011e-07	1.699e-06	14	1127	IL11,BMP2,IL18,IGF1R,CALM1,INSR,CD44,AKT1,TNFRSF11A,NOS2,PTHLH,FGF18,BDNF,VEGFA
GO: Biological Process	GO:0001666	response to hypoxia	1.768e-09	4.627e-06	2.666e-07	2.252e-06	9	313	CITED2,BMP2,IL18,FOSL2,AKT1,MMP13,NOS2,VCAM1,VEGFA
GO: Biological Process	GO:0031328	positive regulation of cellular biosynthetic process	1.834e-09	4.798e-06	2.666e-07	2.252e-06	17	1929	CITED2,IL11,BMP2,SOST,IGF1R,CALM1,FOSL2,INSR,AKT1,TNFRSF11A,IHH,NOS2,PTHLH,BDNF,SP7,VDR,VEGFA
GO: Biological Process	GO:0051173	positive regulation of nitrogen compound metabolic process	2.22e-09	5.809e-06	2.966e-07	2.505e-06	17	1953	CITED2,IL11,BMP2,SOST,IGF1R,CALM1,FOSL2,INSR,AKT1,TNFRSF11A,IHH,NOS2,PTHLH,BDNF,SP7,VDR,VEGFA
GO: Biological Process	GO:0036293	response to decreased oxygen levels	2.266e-09	5.931e-06	2.966e-07	2.505e-06	9	322	CITED2,BMP2,IL18,FOSL2,AKT1,MMP13,NOS2,VCAM1,VEGFA
GO: Biological Process	GO:0070482	response to oxygen levels	3.554e-09	9.3e-06	4.429e-07	3.741e-06	9	339	CITED2,BMP2,IL18,FOSL2,AKT1,MMP13,NOS2,VCAM1,VEGFA
GO: Biological Process	GO:0048608	reproductive structure development	5.129e-09	1.342e-05	5.837e-07	4.931e-06	10	490	CITED2,IGF1R,INSR,CD44,AKT1,MMP13,NOS2,VCAM1,VDR,VEGFA
GO: Biological Process	GO:0022414	reproductive process	5.476e-09	1.433e-05	5.837e-07	4.931e-06	15	1512	CITED2,IL18,IGF1R,INSR,CD44,AKT1,GRN,IHH,MMP13,NOS2,PTHLH,ADIPOR2,VCAM1,VDR,VEGFA
GO: Biological Process	GO:0061458	reproductive system development	5.544e-09	1.451e-05	5.837e-07	4.931e-06	10	494	CITED2,IGF1R,INSR,CD44,AKT1,MMP13,NOS2,VCAM1,VDR,VEGFA
GO: Biological Process	GO:0000003	reproduction	5.576e-09	1.459e-05	5.837e-07	4.931e-06	15	1514	CITED2,IL18,IGF1R,INSR,CD44,AKT1,GRN,IHH,MMP13,NOS2,PTHLH,ADIPOR2,VCAM1,VDR,VEGFA
GO: Biological Process	GO:0044706	multi-multicellular organism process	7.023e-09	1.838e-05	7.017e-07	5.927e-06	8	250	CITED2,AKT1,GRN,IHH,MMP13,PTHLH,ADIPOR2,VDR
GO: Biological Process	GO:0048732	gland development	7.239e-09	1.894e-05	7.017e-07	5.927e-06	10	508	CITED2,BMP2,IGF1R,INSR,CD44,AKT1,TNFRSF11A,PTHLH,VDR,VEGFA
GO: Biological Process	GO:0060429	epithelium development	8.346e-09	2.184e-05	7.8e-07	6.589e-06	14	1307	CITED2,BMP2,IGF1R,MGP,FOSL2,INSR,CD44,AKT1,IHH,PTHLH,BDNF,VCAM1,VDR,VEGFA
GO: Biological Process	GO:0061448	connective tissue development	1.209e-08	3.164e-05	1.091e-06	9.217e-06	8	268	BMP2,COL10A1,MGP,CD44,IHH,MMP13,PTHLH,FGF18
GO: Biological Process	GO:0051240	positive regulation of multicellular organismal process	1.357e-08	3.55e-05	1.152e-06	9.731e-06	15	1616	CITED2,BMP2,IL18,IGF1R,GPR68,AKT1,GRN,TNFRSF11A,IHH,MMP13,NOS2,FGF18,BDNF,VDR,VEGFA
GO: Biological Process	GO:2000026	regulation of multicellular organismal development	1.409e-08	3.686e-05	1.152e-06	9.731e-06	16	1901	CITED2,BMP2,SOST,IGF1R,MGP,GPR68,INSR,CD44,AKT1,GRN,IHH,PTHLH,FGF18,BDNF,VDR,VEGFA
GO: Biological Process	GO:0010628	positive regulation of gene expression	1.409e-08	3.686e-05	1.152e-06	9.731e-06	16	1901	CITED2,IL11,BMP2,SOST,IL18,IGF1R,FOSL2,INSR,CD44,AKT1,TNFRSF11A,IHH,BDNF,SP7,VDR,VEGFA
GO: Biological Process	GO:0003006	developmental process involved in reproduction	1.884e-08	4.931e-05	1.494e-06	1.262e-05	11	736	CITED2,IGF1R,INSR,CD44,AKT1,IHH,MMP13,NOS2,VCAM1,VDR,VEGFA
GO: Biological Process	GO:0023056	positive regulation of signaling	1.985e-08	5.194e-05	1.528e-06	1.29e-05	15	1662	CITED2,IL11,BMP2,IL18,IGF1R,CALM1,GPR68,INSR,CD44,AKT1,TNFRSF11A,IHH,FGF18,BDNF,VEGFA
GO: Biological Process	GO:0048754	branching morphogenesis of an epithelial tube	2.192e-08	5.737e-05	1.639e-06	1.385e-05	7	185	CITED2,BMP2,MGP,CD44,IHH,VDR,VEGFA
GO: Biological Process	GO:0010647	positive regulation of cell communication	2.371e-08	6.205e-05	1.724e-06	1.456e-05	15	1684	CITED2,IL11,BMP2,IL18,IGF1R,CALM1,GPR68,INSR,CD44,AKT1,TNFRSF11A,IHH,FGF18,BDNF,VEGFA
GO: Biological Process	GO:0048545	response to steroid hormone	2.466e-08	6.453e-05	1.744e-06	1.473e-05	10	578	CITED2,CALM1,FOSL2,KCNJ11,INSR,GRN,IHH,MMP13,BDNF,VDR
GO: Biological Process	GO:0001934	positive regulation of protein phosphorylation	2.589e-08	6.776e-05	1.783e-06	1.506e-05	12	960	IL11,BMP2,IL18,IGF1R,CALM1,INSR,CD44,AKT1,TNFRSF11A,FGF18,BDNF,VEGFA
GO: Biological Process	GO:0009628	response to abiotic stimulus	3.69e-08	9.657e-05	2.476e-06	2.092e-05	13	1219	CITED2,BMP2,SOST,IL18,CALM1,GPR68,FOSL2,AKT1,TNFRSF11A,MMP13,NOS2,VCAM1,VEGFA
GO: Biological Process	GO:0042327	positive regulation of phosphorylation	4.25e-08	0.0001112	2.711e-06	2.29e-05	12	1004	IL11,BMP2,IL18,IGF1R,CALM1,INSR,CD44,AKT1,TNFRSF11A,FGF18,BDNF,VEGFA
GO: Biological Process	GO:0019220	regulation of phosphate metabolic process	4.298e-08	0.0001125	2.711e-06	2.29e-05	15	1760	IL11,BMP2,NPR3,IL18,IGF1R,CALM1,INSR,CD44,AKT1,TNFRSF11A,NOS2,PTHLH,FGF18,BDNF,VEGFA
GO: Biological Process	GO:0009967	positive regulation of signal transduction	4.352e-08	0.0001139	2.711e-06	2.29e-05	14	1488	CITED2,IL11,BMP2,IL18,IGF1R,CALM1,INSR,CD44,AKT1,TNFRSF11A,IHH,FGF18,BDNF,VEGFA
GO: Biological Process	GO:0051174	regulation of phosphorus metabolic process	4.744e-08	0.0001242	2.887e-06	2.439e-05	15	1773	IL11,BMP2,NPR3,IL18,IGF1R,CALM1,INSR,CD44,AKT1,TNFRSF11A,NOS2,PTHLH,FGF18,BDNF,VEGFA
GO: Biological Process	GO:0010557	positive regulation of macromolecule biosynthetic process	5.193e-08	0.0001359	3.089e-06	2.609e-05	15	1785	CITED2,IL11,BMP2,SOST,IL18,IGF1R,FOSL2,INSR,AKT1,TNFRSF11A,IHH,BDNF,SP7,VDR,VEGFA
GO: Biological Process	GO:1903508	positive regulation of nucleic acid-templated transcription	6.441e-08	0.0001686	3.583e-06	3.027e-05	14	1535	CITED2,IL11,BMP2,SOST,IGF1R,FOSL2,INSR,AKT1,TNFRSF11A,IHH,BDNF,SP7,VDR,VEGFA
GO: Biological Process	GO:0045893	positive regulation of transcription, DNA-templated	6.441e-08	0.0001686	3.583e-06	3.027e-05	14	1535	CITED2,IL11,BMP2,SOST,IGF1R,FOSL2,INSR,AKT1,TNFRSF11A,IHH,BDNF,SP7,VDR,VEGFA
GO: Biological Process	GO:0007565	female pregnancy	6.562e-08	0.0001717	3.583e-06	3.027e-05	7	217	CITED2,AKT1,GRN,IHH,PTHLH,ADIPOR2,VDR
GO: Biological Process	GO:0071495	cellular response to endogenous stimulus	6.572e-08	0.000172	3.583e-06	3.027e-05	13	1280	CITED2,BMP2,SOST,IL18,IGF1R,KCNJ11,INSR,CD44,AKT1,FGF18,ADIPOR2,BDNF,VDR
GO: Biological Process	GO:1902680	positive regulation of RNA biosynthetic process	7.457e-08	0.0001952	3.983e-06	3.364e-05	14	1553	CITED2,IL11,BMP2,SOST,IGF1R,FOSL2,INSR,AKT1,TNFRSF11A,IHH,BDNF,SP7,VDR,VEGFA
GO: Biological Process	GO:0061138	morphogenesis of a branching epithelium	7.669e-08	0.0002007	4.014e-06	3.39e-05	7	222	CITED2,BMP2,MGP,CD44,IHH,VDR,VEGFA
GO: Biological Process	GO:0001649	osteoblast differentiation	8.153e-08	0.0002134	4.184e-06	3.534e-05	7	224	BMP2,AKT1,IHH,MMP13,PTHLH,SP7,VEGFA
GO: Biological Process	GO:0051094	positive regulation of developmental process	1.022e-07	0.0002675	5.145e-06	4.346e-05	13	1329	CITED2,BMP2,IGF1R,GPR68,INSR,AKT1,GRN,IHH,FGF18,BDNF,SP7,VDR,VEGFA
GO: Biological Process	GO:0051254	positive regulation of RNA metabolic process	1.092e-07	0.0002859	5.324e-06	4.497e-05	14	1601	CITED2,IL11,BMP2,SOST,IGF1R,FOSL2,INSR,AKT1,TNFRSF11A,IHH,BDNF,SP7,VDR,VEGFA
GO: Biological Process	GO:0043627	response to estrogen	1.098e-07	0.0002875	5.324e-06	4.497e-05	7	234	CITED2,FOSL2,KCNJ11,INSR,GRN,IHH,MMP13
GO: Biological Process	GO:0048705	skeletal system morphogenesis	1.131e-07	0.0002959	5.381e-06	4.545e-05	7	235	CITED2,COL10A1,MGP,MMP13,PTHLH,FGF18,VEGFA
GO: Biological Process	GO:1901700	response to oxygen-containing compound	1.218e-07	0.0003187	5.661e-06	4.782e-05	14	1615	IL18,IGF1R,CALM1,GPR68,FOSL2,KCNJ11,INSR,AKT1,GRN,TNFRSF11A,IHH,NOS2,VCAM1,VDR
GO: Biological Process	GO:0001763	morphogenesis of a branching structure	1.233e-07	0.0003227	5.661e-06	4.782e-05	7	238	CITED2,BMP2,MGP,CD44,IHH,VDR,VEGFA
GO: Biological Process	GO:0035295	tube development	1.371e-07	0.0003587	6.184e-06	5.224e-05	10	694	CITED2,BMP2,MGP,CD44,IHH,PTHLH,FGF18,BDNF,VDR,VEGFA
GO: Biological Process	GO:0044702	single organism reproductive process	1.41e-07	0.000369	6.254e-06	5.283e-05	13	1366	CITED2,IL18,IGF1R,INSR,CD44,AKT1,GRN,IHH,MMP13,NOS2,VCAM1,VDR,VEGFA
GO: Biological Process	GO:0060562	epithelial tube morphogenesis	1.62e-07	0.0004239	7.064e-06	5.967e-05	8	375	CITED2,BMP2,MGP,CD44,IHH,PTHLH,VDR,VEGFA
GO: Biological Process	GO:0030879	mammary gland development	2.013e-07	0.0005268	8.527e-06	7.203e-05	6	153	IGF1R,AKT1,TNFRSF11A,PTHLH,VDR,VEGFA
GO: Biological Process	GO:0000165	MAPK cascade	2.02e-07	0.0005287	8.527e-06	7.203e-05	11	929	IL11,BMP2,IL18,IGF1R,CALM1,INSR,CD44,AKT1,TNFRSF11A,FGF18,VEGFA
GO: Biological Process	GO:0036075	replacement ossification	2.112e-07	0.0005528	8.637e-06	7.296e-05	4	31	COL10A1,MMP13,PTHLH,FGF18
GO: Biological Process	GO:0001958	endochondral ossification	2.112e-07	0.0005528	8.637e-06	7.296e-05	4	31	COL10A1,MMP13,PTHLH,FGF18
GO: Biological Process	GO:0042593	glucose homeostasis	2.307e-07	0.0006038	9.149e-06	7.728e-05	7	261	IGF1R,GPR68,KCNJ11,INSR,AKT1,ADIPOR2,VCAM1
GO: Biological Process	GO:0033500	carbohydrate homeostasis	2.307e-07	0.0006038	9.149e-06	7.728e-05	7	261	IGF1R,GPR68,KCNJ11,INSR,AKT1,ADIPOR2,VCAM1
GO: Biological Process	GO:0045595	regulation of cell differentiation	2.41e-07	0.0006307	9.413e-06	7.951e-05	14	1706	BMP2,IL18,IGF1R,GPR68,CD44,AKT1,GRN,IHH,PTHLH,FGF18,BDNF,SP7,VDR,VEGFA
GO: Biological Process	GO:0097305	response to alcohol	2.55e-07	0.0006675	9.816e-06	8.291e-05	8	398	CALM1,FOSL2,KCNJ11,INSR,GRN,IHH,VCAM1,VDR
GO: Biological Process	GO:0023014	signal transduction by protein phosphorylation	2.899e-07	0.0007587	1.1e-05	9.288e-05	11	963	IL11,BMP2,IL18,IGF1R,CALM1,INSR,CD44,AKT1,TNFRSF11A,FGF18,VEGFA
GO: Biological Process	GO:0045597	positive regulation of cell differentiation	3.15e-07	0.0008243	1.178e-05	9.948e-05	11	971	BMP2,IGF1R,GPR68,AKT1,GRN,IHH,FGF18,BDNF,SP7,VDR,VEGFA
GO: Biological Process	GO:0035239	tube morphogenesis	3.635e-07	0.0009514	1.34e-05	0.0001132	8	417	CITED2,BMP2,MGP,CD44,IHH,PTHLH,VDR,VEGFA
GO: Biological Process	GO:0031401	positive regulation of protein modification process	3.928e-07	0.001028	1.428e-05	0.0001206	12	1231	IL11,BMP2,IL18,IGF1R,CALM1,INSR,CD44,AKT1,TNFRSF11A,FGF18,BDNF,VEGFA
GO: Biological Process	GO:0007267	cell-cell signaling	4.068e-07	0.001065	1.458e-05	0.0001232	12	1235	IL11,BMP2,IL18,GPR68,KCNJ11,AKT1,TNFRSF11A,IHH,NOS2,PTHLH,FGF18,BDNF
GO: Biological Process	GO:0022407	regulation of cell-cell adhesion	4.921e-07	0.001288	1.74e-05	0.000147	8	434	CITED2,BMP2,IL18,CD44,AKT1,IHH,VCAM1,VEGFA
GO: Biological Process	GO:0060349	bone morphogenesis	5.099e-07	0.001334	1.779e-05	0.0001503	5	94	CITED2,COL10A1,MMP13,PTHLH,FGF18
GO: Biological Process	GO:0033138	positive regulation of peptidyl-serine phosphorylation	5.376e-07	0.001407	1.851e-05	0.0001564	5	95	IL11,CD44,AKT1,BDNF,VEGFA
GO: Biological Process	GO:0002009	morphogenesis of an epithelium	5.667e-07	0.001483	1.926e-05	0.0001627	9	613	CITED2,BMP2,IGF1R,MGP,CD44,IHH,PTHLH,VDR,VEGFA
GO: Biological Process	GO:0072359	circulatory system development	7.693e-07	0.002013	2.548e-05	0.0002153	11	1062	CITED2,BMP2,IL18,INSR,AKT1,IHH,MMP13,FGF18,ADIPOR2,VCAM1,VEGFA
GO: Biological Process	GO:0072358	cardiovascular system development	7.693e-07	0.002013	2.548e-05	0.0002153	11	1062	CITED2,BMP2,IL18,INSR,AKT1,IHH,MMP13,FGF18,ADIPOR2,VCAM1,VEGFA
GO: Biological Process	GO:0071363	cellular response to growth factor stimulus	8.445e-07	0.00221	2.763e-05	0.0002334	9	643	CITED2,BMP2,SOST,INSR,CD44,AKT1,FGF18,VCAM1,VEGFA
GO: Biological Process	GO:0001657	ureteric bud development	8.853e-07	0.002317	2.86e-05	0.0002416	5	105	CITED2,BMP2,CD44,BDNF,VEGFA
GO: Biological Process	GO:0072164	mesonephric tubule development	9.28e-07	0.002429	2.895e-05	0.0002446	5	106	CITED2,BMP2,CD44,BDNF,VEGFA
GO: Biological Process	GO:0072163	mesonephric epithelium development	9.28e-07	0.002429	2.895e-05	0.0002446	5	106	CITED2,BMP2,CD44,BDNF,VEGFA
GO: Biological Process	GO:0071902	positive regulation of protein serine/threonine kinase activity	9.293e-07	0.002432	2.895e-05	0.0002446	7	321	BMP2,CALM1,INSR,AKT1,TNFRSF11A,FGF18,VEGFA
GO: Biological Process	GO:0050678	regulation of epithelial cell proliferation	1.031e-06	0.002697	3.173e-05	0.000268	7	326	BMP2,AKT1,GRN,IHH,FGF18,VDR,VEGFA
GO: Biological Process	GO:0001823	mesonephros development	1.115e-06	0.002919	3.394e-05	0.0002867	5	110	CITED2,BMP2,CD44,BDNF,VEGFA
GO: Biological Process	GO:0070848	response to growth factor	1.219e-06	0.003189	3.666e-05	0.0003096	9	672	CITED2,BMP2,SOST,INSR,CD44,AKT1,FGF18,VCAM1,VEGFA
GO: Biological Process	GO:0048609	multicellular organismal reproductive process	1.405e-06	0.003676	4.177e-05	0.0003529	10	894	CITED2,IL18,IGF1R,AKT1,GRN,IHH,MMP13,NOS2,VDR,VEGFA
GO: Biological Process	GO:0048878	chemical homeostasis	1.522e-06	0.003982	4.475e-05	0.000378	11	1138	IGF1R,CALM1,GPR68,KCNJ11,INSR,AKT1,PTHLH,ADIPOR2,VCAM1,VDR,VEGFA
GO: Biological Process	GO:0032504	multicellular organism reproduction	1.617e-06	0.004231	4.66e-05	0.0003936	10	908	CITED2,IL18,IGF1R,AKT1,GRN,IHH,MMP13,NOS2,VDR,VEGFA
GO: Biological Process	GO:0001932	regulation of protein phosphorylation	1.624e-06	0.004251	4.66e-05	0.0003936	12	1406	IL11,BMP2,IL18,IGF1R,CALM1,INSR,CD44,AKT1,TNFRSF11A,FGF18,BDNF,VEGFA
GO: Biological Process	GO:0051353	positive regulation of oxidoreductase activity	1.638e-06	0.004287	4.66e-05	0.0003936	4	51	NPR3,CALM1,AKT1,VDR
GO: Biological Process	GO:0071900	regulation of protein serine/threonine kinase activity	1.729e-06	0.004525	4.865e-05	0.000411	8	513	BMP2,IGF1R,CALM1,INSR,AKT1,TNFRSF11A,FGF18,VEGFA
GO: Biological Process	GO:0043410	positive regulation of MAPK cascade	1.968e-06	0.005151	5.48e-05	0.0004629	8	522	IL11,BMP2,IGF1R,INSR,CD44,TNFRSF11A,FGF18,VEGFA
GO: Biological Process	GO:1900542	regulation of purine nucleotide metabolic process	2.083e-06	0.005452	5.739e-05	0.0004848	6	228	NPR3,CALM1,INSR,NOS2,PTHLH,VEGFA
GO: Biological Process	GO:0060350	endochondral bone morphogenesis	2.225e-06	0.005823	6.065e-05	0.0005123	4	55	COL10A1,MMP13,PTHLH,FGF18
GO: Biological Process	GO:0033135	regulation of peptidyl-serine phosphorylation	2.27e-06	0.005941	6.124e-05	0.0005173	5	127	IL11,CD44,AKT1,BDNF,VEGFA
GO: Biological Process	GO:0002521	leukocyte differentiation	2.364e-06	0.006186	6.313e-05	0.0005332	8	535	CITED2,IL11,GPR68,CD44,TNFRSF11A,IHH,VCAM1,VEGFA
GO: Biological Process	GO:0006140	regulation of nucleotide metabolic process	2.544e-06	0.006657	6.724e-05	0.000568	6	236	NPR3,CALM1,INSR,NOS2,PTHLH,VEGFA
GO: Biological Process	GO:0043408	regulation of MAPK cascade	2.582e-06	0.006758	6.758e-05	0.0005709	9	736	IL11,BMP2,IGF1R,INSR,CD44,AKT1,TNFRSF11A,FGF18,VEGFA
GO: Biological Process	GO:1902533	positive regulation of intracellular signal transduction	2.622e-06	0.006861	6.793e-05	0.0005738	10	958	IL11,BMP2,IL18,IGF1R,CALM1,INSR,CD44,TNFRSF11A,FGF18,VEGFA
GO: Biological Process	GO:0018108	peptidyl-tyrosine phosphorylation	3.111e-06	0.008142	7.982e-05	0.0006743	7	385	IL11,IL18,IGF1R,INSR,CD44,FGF18,VEGFA
GO: Biological Process	GO:0018212	peptidyl-tyrosine modification	3.219e-06	0.008425	8.18e-05	0.000691	7	387	IL11,IL18,IGF1R,INSR,CD44,FGF18,VEGFA
GO: Biological Process	GO:0046903	secretion	3.253e-06	0.008513	8.185e-05	0.0006914	11	1230	IL11,NPR3,CALM1,GPR68,KCNJ11,TNFRSF11A,MMP13,NOS2,BDNF,VDR,VEGFA
GO: Biological Process	GO:0032768	regulation of monooxygenase activity	3.38e-06	0.008846	8.425e-05	0.0007116	4	61	NPR3,CALM1,AKT1,VDR
GO: Biological Process	GO:0042325	regulation of phosphorylation	3.488e-06	0.009129	8.612e-05	0.0007275	12	1512	IL11,BMP2,IL18,IGF1R,CALM1,INSR,CD44,AKT1,TNFRSF11A,FGF18,BDNF,VEGFA
GO: Biological Process	GO:0032270	positive regulation of cellular protein metabolic process	3.537e-06	0.009256	8.65e-05	0.0007307	12	1514	IL11,BMP2,IL18,IGF1R,CALM1,INSR,CD44,AKT1,TNFRSF11A,FGF18,BDNF,VEGFA
GO: Biological Process	GO:0048729	tissue morphogenesis	3.583e-06	0.009377	8.683e-05	0.0007334	9	766	CITED2,BMP2,IGF1R,MGP,CD44,IHH,PTHLH,VDR,VEGFA
GO: Biological Process	GO:0050673	epithelial cell proliferation	3.623e-06	0.009483	8.7e-05	0.0007349	7	394	BMP2,AKT1,GRN,IHH,FGF18,VDR,VEGFA
GO: Biological Process	GO:0018193	peptidyl-amino acid modification	3.659e-06	0.009576	8.705e-05	0.0007353	11	1245	IL11,IL18,IGF1R,CALM1,INSR,CD44,AKT1,NOS2,FGF18,BDNF,VEGFA
GO: Biological Process	GO:2000243	positive regulation of reproductive process	3.849e-06	0.01007	9.075e-05	0.0007666	4	63	CITED2,IL18,IGF1R,INSR
GO: Biological Process	GO:0042981	regulation of apoptotic process	4.001e-06	0.01047	9.35e-05	0.0007898	12	1532	CITED2,IL11,BMP2,IL18,IGF1R,CD44,AKT1,TNFRSF11A,IHH,BDNF,VDR,VEGFA
GO: Biological Process	GO:0001658	branching involved in ureteric bud morphogenesis	4.101e-06	0.01073	9.497e-05	0.0008022	4	64	CITED2,BMP2,CD44,VEGFA
GO: Biological Process	GO:0035270	endocrine system development	4.208e-06	0.01101	9.66e-05	0.000816	5	144	CITED2,BMP2,IGF1R,INSR,AKT1
GO: Biological Process	GO:0043067	regulation of programmed cell death	4.489e-06	0.01175	0.0001022	0.0008629	12	1549	CITED2,IL11,BMP2,IL18,IGF1R,CD44,AKT1,TNFRSF11A,IHH,BDNF,VDR,VEGFA
GO: Biological Process	GO:0061035	regulation of cartilage development	4.64e-06	0.01214	0.0001047	0.0008843	4	66	BMP2,IHH,PTHLH,FGF18
GO: Biological Process	GO:0072073	kidney epithelium development	4.812e-06	0.01259	0.0001076	0.0009092	5	148	CITED2,BMP2,CD44,BDNF,VEGFA
GO: Biological Process	GO:0060135	maternal process involved in female pregnancy	5.231e-06	0.01369	0.0001155	0.0009759	4	68	CITED2,AKT1,IHH,VDR
GO: Biological Process	GO:0007507	heart development	5.253e-06	0.01375	0.0001155	0.0009759	8	596	CITED2,BMP2,INSR,IHH,MMP13,ADIPOR2,VCAM1,VEGFA
GO: Biological Process	GO:0032355	response to estradiol	5.482e-06	0.01435	0.0001196	0.00101	5	152	FOSL2,KCNJ11,INSR,GRN,IHH
GO: Biological Process	GO:0016477	cell migration	5.64e-06	0.01476	0.000122	0.00103	11	1302	CITED2,BMP2,IL18,IGF1R,INSR,CD44,AKT1,TNFRSF11A,FGF18,VCAM1,VEGFA
GO: Biological Process	GO:0001701	in utero embryonic development	5.778e-06	0.01512	0.0001234	0.001042	7	423	CITED2,BMP2,AKT1,GRN,IHH,VCAM1,VEGFA
GO: Biological Process	GO:0044703	multi-organism reproductive process	5.798e-06	0.01517	0.0001234	0.001042	10	1047	CITED2,IL18,AKT1,GRN,IHH,MMP13,NOS2,PTHLH,ADIPOR2,VDR
GO: Biological Process	GO:0060675	ureteric bud morphogenesis	5.875e-06	0.01538	0.000124	0.001047	4	70	CITED2,BMP2,CD44,VEGFA
GO: Biological Process	GO:1901135	carbohydrate derivative metabolic process	5.939e-06	0.01554	0.0001243	0.00105	11	1309	BMP2,NPR3,CALM1,INSR,CD44,AKT1,IHH,NOS2,PTHLH,BDNF,VEGFA
GO: Biological Process	GO:0045785	positive regulation of cell adhesion	6.146e-06	0.01608	0.0001276	0.001078	7	427	CITED2,IL18,CD44,AKT1,IHH,VCAM1,VEGFA
GO: Biological Process	GO:0072171	mesonephric tubule morphogenesis	6.219e-06	0.01627	0.0001281	0.001082	4	71	CITED2,BMP2,CD44,VEGFA
GO: Biological Process	GO:0023057	negative regulation of signaling	6.298e-06	0.01648	0.0001288	0.001088	11	1317	IL11,BMP2,SOST,IGF1R,CALM1,KCNJ11,CD44,AKT1,IHH,BDNF,VEGFA
GO: Biological Process	GO:0022409	positive regulation of cell-cell adhesion	6.394e-06	0.01673	0.0001297	0.001096	6	277	CITED2,IL18,CD44,AKT1,IHH,VCAM1
GO: Biological Process	GO:0051050	positive regulation of transport	6.578e-06	0.01722	0.0001324	0.001119	10	1062	IL18,CALM1,GPR68,KCNJ11,INSR,AKT1,TNFRSF11A,MMP13,ADIPOR2,VEGFA
GO: Biological Process	GO:0051000	positive regulation of nitric-oxide synthase activity	6.764e-06	0.0177	0.0001351	0.001142	3	22	NPR3,CALM1,AKT1
GO: Biological Process	GO:0051247	positive regulation of protein metabolic process	6.833e-06	0.01788	0.0001355	0.001144	12	1613	IL11,BMP2,IL18,IGF1R,CALM1,INSR,CD44,AKT1,TNFRSF11A,FGF18,BDNF,VEGFA
GO: Biological Process	GO:0010648	negative regulation of cell communication	7.123e-06	0.01864	0.0001402	0.001184	11	1334	IL11,BMP2,SOST,IGF1R,CALM1,KCNJ11,CD44,AKT1,IHH,BDNF,VEGFA
GO: Biological Process	GO:0030335	positive regulation of cell migration	8.168e-06	0.02137	0.0001595	0.001347	7	446	BMP2,IL18,IGF1R,INSR,AKT1,FGF18,VEGFA
GO: Biological Process	GO:0030097	hemopoiesis	9.004e-06	0.02356	0.0001745	0.001474	9	858	CITED2,IL11,GPR68,CD44,TNFRSF11A,IHH,VCAM1,SP7,VEGFA
GO: Biological Process	GO:0040007	growth	9.268e-06	0.02425	0.0001783	0.001506	10	1104	BMP2,INSR,CD44,AKT1,IHH,MMP13,PTHLH,ADIPOR2,BDNF,VEGFA
GO: Biological Process	GO:0010941	regulation of cell death	9.36e-06	0.0245	0.0001788	0.00151	12	1663	CITED2,IL11,BMP2,IL18,IGF1R,CD44,AKT1,TNFRSF11A,IHH,BDNF,VDR,VEGFA
GO: Biological Process	GO:0030799	regulation of cyclic nucleotide metabolic process	9.455e-06	0.02474	0.0001793	0.001515	5	170	NPR3,CALM1,NOS2,PTHLH,VEGFA
GO: Biological Process	GO:0072078	nephron tubule morphogenesis	9.525e-06	0.02493	0.0001793	0.001515	4	79	CITED2,BMP2,CD44,VEGFA
GO: Biological Process	GO:0051049	regulation of transport	9.6e-06	0.02512	0.0001794	0.001516	13	1980	IL11,IL18,CALM1,GPR68,KCNJ11,INSR,AKT1,TNFRSF11A,MMP13,NOS2,ADIPOR2,VDR,VEGFA
GO: Biological Process	GO:2000147	positive regulation of cell motility	9.848e-06	0.02577	0.0001828	0.001544	7	459	BMP2,IL18,IGF1R,INSR,AKT1,FGF18,VEGFA
GO: Biological Process	GO:0007530	sex determination	1.007e-05	0.02635	0.0001842	0.001556	3	25	CITED2,IGF1R,INSR
GO: Biological Process	GO:0033688	regulation of osteoblast proliferation	1.007e-05	0.02635	0.0001842	0.001556	3	25	BMP2,NPR3,IGF1R
GO: Biological Process	GO:0072088	nephron epithelium morphogenesis	1.052e-05	0.02754	0.0001912	0.001615	4	81	CITED2,BMP2,CD44,VEGFA
GO: Biological Process	GO:0050679	positive regulation of epithelial cell proliferation	1.15e-05	0.03009	0.0002073	0.001751	5	177	BMP2,AKT1,GRN,IHH,VEGFA
GO: Biological Process	GO:0072028	nephron morphogenesis	1.159e-05	0.03034	0.0002073	0.001751	4	83	CITED2,BMP2,CD44,VEGFA
GO: Biological Process	GO:0051272	positive regulation of cellular component movement	1.165e-05	0.03048	0.0002073	0.001751	7	471	BMP2,IL18,IGF1R,INSR,AKT1,FGF18,VEGFA
GO: Biological Process	GO:0061333	renal tubule morphogenesis	1.216e-05	0.03182	0.000215	0.001816	4	84	CITED2,BMP2,CD44,VEGFA
GO: Biological Process	GO:0040017	positive regulation of locomotion	1.282e-05	0.03354	0.0002251	0.001901	7	478	BMP2,IL18,IGF1R,INSR,AKT1,FGF18,VEGFA
GO: Biological Process	GO:0032870	cellular response to hormone stimulus	1.362e-05	0.03564	0.0002376	0.002007	8	679	SOST,IL18,IGF1R,INSR,AKT1,ADIPOR2,BDNF,VDR
GO: Biological Process	GO:0048534	hematopoietic or lymphoid organ development	1.382e-05	0.03617	0.0002396	0.002024	9	905	CITED2,IL11,GPR68,CD44,TNFRSF11A,IHH,VCAM1,SP7,VEGFA
GO: Biological Process	GO:0048870	cell motility	1.41e-05	0.0369	0.0002412	0.002037	11	1433	CITED2,BMP2,IL18,IGF1R,INSR,CD44,AKT1,TNFRSF11A,FGF18,VCAM1,VEGFA
GO: Biological Process	GO:0051674	localization of cell	1.41e-05	0.0369	0.0002412	0.002037	11	1433	CITED2,BMP2,IL18,IGF1R,INSR,CD44,AKT1,TNFRSF11A,FGF18,VCAM1,VEGFA
GO: Biological Process	GO:0040011	locomotion	1.488e-05	0.03893	0.0002526	0.002134	12	1740	CITED2,BMP2,IL18,IGF1R,INSR,CD44,AKT1,TNFRSF11A,FGF18,BDNF,VCAM1,VEGFA
GO: Biological Process	GO:0043066	negative regulation of apoptotic process	1.496e-05	0.03915	0.0002526	0.002134	9	914	CITED2,IL11,IL18,IGF1R,CD44,AKT1,IHH,BDNF,VEGFA
GO: Biological Process	GO:0051093	negative regulation of developmental process	1.59e-05	0.04162	0.0002637	0.002228	9	921	BMP2,SOST,IL18,GPR68,CD44,IHH,PTHLH,BDNF,VEGFA
GO: Biological Process	GO:0033687	osteoblast proliferation	1.592e-05	0.04166	0.0002637	0.002228	3	29	BMP2,NPR3,IGF1R
GO: Biological Process	GO:0032770	positive regulation of monooxygenase activity	1.592e-05	0.04166	0.0002637	0.002228	3	29	NPR3,CALM1,AKT1
GO: Biological Process	GO:0070374	positive regulation of ERK1 and ERK2 cascade	1.62e-05	0.04239	0.0002662	0.002249	5	190	BMP2,CD44,TNFRSF11A,FGF18,VEGFA
GO: Biological Process	GO:0045860	positive regulation of protein kinase activity	1.628e-05	0.0426	0.0002662	0.002249	7	496	BMP2,CALM1,INSR,AKT1,TNFRSF11A,FGF18,VEGFA
GO: Biological Process	GO:0045596	negative regulation of cell differentiation	1.68e-05	0.04397	0.0002729	0.002305	8	699	BMP2,IL18,GPR68,CD44,IHH,PTHLH,BDNF,VEGFA
GO: Biological Process	GO:0043069	negative regulation of programmed cell death	1.689e-05	0.04421	0.0002729	0.002305	9	928	CITED2,IL11,IL18,IGF1R,CD44,AKT1,IHH,BDNF,VEGFA
GO: Biological Process	GO:0031016	pancreas development	1.744e-05	0.04564	0.00028	0.002365	4	92	IGF1R,INSR,AKT1,IHH
GO: Biological Process	GO:0030325	adrenal gland development	1.767e-05	0.04624	0.000282	0.002382	3	30	CITED2,IGF1R,INSR
GO: Biological Process	GO:0044711	single-organism biosynthetic process	1.822e-05	0.04767	0.0002889	0.002441	12	1775	BMP2,NPR3,IL18,IGF1R,CALM1,INSR,AKT1,IHH,NOS2,PTHLH,FGF18,VDR
GO: Biological Process	GO:0030155	regulation of cell adhesion	1.862e-05	0.04873	0.0002935	0.002479	8	709	CITED2,BMP2,IL18,CD44,AKT1,IHH,VCAM1,VEGFA
GO: Biological Process	GO:0061036	positive regulation of cartilage development	1.954e-05	0.05114	0.0003051	0.002577	3	31	BMP2,IHH,FGF18
GO: Biological Process	GO:0006954	inflammatory response	1.959e-05	0.05126	0.0003051	0.002577	8	714	BMP2,IL18,GPR68,CD44,AKT1,TNFRSF11A,NOS2,VCAM1
GO: Biological Process	GO:0032941	secretion by tissue	1.98e-05	0.05182	0.0003066	0.00259	4	95	NPR3,MMP13,VDR,VEGFA
GO: Biological Process	GO:0002520	immune system development	2.141e-05	0.05602	0.0003275	0.002767	9	956	CITED2,IL11,GPR68,CD44,TNFRSF11A,IHH,VCAM1,SP7,VEGFA
GO: Biological Process	GO:0051341	regulation of oxidoreductase activity	2.15e-05	0.05626	0.0003275	0.002767	4	97	NPR3,CALM1,AKT1,VDR
GO: Biological Process	GO:0008544	epidermis development	2.153e-05	0.05633	0.0003275	0.002767	6	343	IGF1R,FOSL2,INSR,AKT1,PTHLH,VDR
GO: Biological Process	GO:0072080	nephron tubule development	2.239e-05	0.05859	0.0003387	0.002861	4	98	CITED2,BMP2,CD44,VEGFA
GO: Biological Process	GO:0009187	cyclic nucleotide metabolic process	2.447e-05	0.06404	0.000368	0.003109	5	207	NPR3,CALM1,NOS2,PTHLH,VEGFA
GO: Biological Process	GO:0033674	positive regulation of kinase activity	2.494e-05	0.06526	0.0003729	0.00315	7	530	BMP2,CALM1,INSR,AKT1,TNFRSF11A,FGF18,VEGFA
GO: Biological Process	GO:0060993	kidney morphogenesis	2.521e-05	0.06598	0.0003749	0.003167	4	101	CITED2,BMP2,CD44,VEGFA
GO: Biological Process	GO:0030334	regulation of cell migration	2.608e-05	0.06825	0.0003854	0.003255	8	743	CITED2,BMP2,IL18,IGF1R,INSR,AKT1,FGF18,VEGFA
GO: Biological Process	GO:0061326	renal tubule development	2.621e-05	0.0686	0.0003854	0.003255	4	102	CITED2,BMP2,CD44,VEGFA
GO: Biological Process	GO:0043405	regulation of MAP kinase activity	2.654e-05	0.06945	0.000388	0.003277	6	356	BMP2,IGF1R,INSR,TNFRSF11A,FGF18,VEGFA
GO: Biological Process	GO:0009150	purine ribonucleotide metabolic process	2.713e-05	0.07099	0.0003916	0.003308	7	537	NPR3,CALM1,INSR,NOS2,PTHLH,BDNF,VEGFA
GO: Biological Process	GO:0031399	regulation of protein modification process	2.723e-05	0.07126	0.0003916	0.003308	12	1847	IL11,BMP2,IL18,IGF1R,CALM1,INSR,CD44,AKT1,TNFRSF11A,FGF18,BDNF,VEGFA
GO: Biological Process	GO:0001936	regulation of endothelial cell proliferation	2.724e-05	0.07128	0.0003916	0.003308	4	103	BMP2,AKT1,FGF18,VEGFA
GO: Biological Process	GO:0001655	urogenital system development	2.739e-05	0.07167	0.0003916	0.003308	6	358	CITED2,BMP2,IGF1R,CD44,BDNF,VEGFA
GO: Biological Process	GO:0001893	maternal placenta development	2.832e-05	0.07411	0.0004028	0.003402	3	35	CITED2,AKT1,VDR
GO: Biological Process	GO:0007589	body fluid secretion	2.938e-05	0.07689	0.0004156	0.003511	4	105	NPR3,MMP13,VDR,VEGFA
GO: Biological Process	GO:0002062	chondrocyte differentiation	3.05e-05	0.07981	0.0004291	0.003624	4	106	BMP2,IHH,PTHLH,FGF18
GO: Biological Process	GO:1901701	cellular response to oxygen-containing compound	3.106e-05	0.08127	0.0004346	0.003671	9	1002	IL18,IGF1R,GPR68,KCNJ11,INSR,AKT1,NOS2,VCAM1,VDR
GO: Biological Process	GO:0009259	ribonucleotide metabolic process	3.235e-05	0.08466	0.0004503	0.003804	7	552	NPR3,CALM1,INSR,NOS2,PTHLH,BDNF,VEGFA
GO: Biological Process	GO:0060548	negative regulation of cell death	3.332e-05	0.08721	0.0004614	0.003898	9	1011	CITED2,IL11,IL18,IGF1R,CD44,AKT1,IHH,BDNF,VEGFA
GO: Biological Process	GO:0034405	response to fluid shear stress	3.354e-05	0.08778	0.000462	0.003903	3	37	CITED2,AKT1,MMP13
GO: Biological Process	GO:0006163	purine nucleotide metabolic process	3.388e-05	0.08866	0.0004623	0.003905	7	556	NPR3,CALM1,INSR,NOS2,PTHLH,BDNF,VEGFA
GO: Biological Process	GO:0006928	movement of cell or subcellular component	3.394e-05	0.08883	0.0004623	0.003905	12	1888	CITED2,BMP2,IL18,IGF1R,INSR,CD44,AKT1,TNFRSF11A,FGF18,BDNF,VCAM1,VEGFA
GO: Biological Process	GO:0032872	regulation of stress-activated MAPK cascade	3.421e-05	0.08953	0.0004623	0.003905	5	222	BMP2,IGF1R,AKT1,TNFRSF11A,VEGFA
GO: Biological Process	GO:0008015	blood circulation	3.427e-05	0.08968	0.0004623	0.003905	7	557	NPR3,IL18,CALM1,KCNJ11,AKT1,NOS2,VEGFA
GO: Biological Process	GO:0070302	regulation of stress-activated protein kinase signaling cascade	3.495e-05	0.09147	0.0004691	0.003962	5	223	BMP2,IGF1R,AKT1,TNFRSF11A,VEGFA
GO: Biological Process	GO:0045859	regulation of protein kinase activity	3.526e-05	0.09228	0.0004708	0.003977	8	775	BMP2,IGF1R,CALM1,INSR,AKT1,TNFRSF11A,FGF18,VEGFA
GO: Biological Process	GO:0003013	circulatory system process	3.546e-05	0.0928	0.0004711	0.003979	7	560	NPR3,IL18,CALM1,KCNJ11,AKT1,NOS2,VEGFA
GO: Biological Process	GO:0044093	positive regulation of molecular function	3.598e-05	0.09415	0.0004735	0.004	12	1899	BMP2,NPR3,CALM1,KCNJ11,INSR,AKT1,TNFRSF11A,NOS2,FGF18,BDNF,VDR,VEGFA
GO: Biological Process	GO:0007167	enzyme linked receptor protein signaling pathway	3.601e-05	0.09424	0.0004735	0.004	9	1021	CITED2,BMP2,SOST,IGF1R,INSR,AKT1,FGF18,BDNF,VEGFA
GO: Biological Process	GO:0071407	cellular response to organic cyclic compound	3.628e-05	0.09494	0.0004747	0.00401	7	562	BMP2,IL18,KCNJ11,AKT1,NOS2,BDNF,VDR
GO: Biological Process	GO:0030282	bone mineralization	3.655e-05	0.09564	0.0004758	0.004019	4	111	BMP2,MGP,MMP13,PTHLH
GO: Biological Process	GO:0045444	fat cell differentiation	3.726e-05	0.0975	0.0004827	0.004077	5	226	IL11,BMP2,INSR,AKT1,VEGFA
GO: Biological Process	GO:0019693	ribose phosphate metabolic process	3.838e-05	0.1004	0.0004948	0.00418	7	567	NPR3,CALM1,INSR,NOS2,PTHLH,BDNF,VEGFA
GO: Biological Process	GO:0048009	insulin-like growth factor receptor signaling pathway	3.936e-05	0.103	0.0005049	0.004265	3	39	BMP2,IGF1R,AKT1
GO: Biological Process	GO:0072009	nephron epithelium development	4.057e-05	0.1062	0.000518	0.004375	4	114	CITED2,BMP2,CD44,VEGFA
GO: Biological Process	GO:2000145	regulation of cell motility	4.19e-05	0.1096	0.0005305	0.004481	8	794	CITED2,BMP2,IL18,IGF1R,INSR,AKT1,FGF18,VEGFA
GO: Biological Process	GO:0010720	positive regulation of cell development	4.196e-05	0.1098	0.0005305	0.004481	7	575	BMP2,IGF1R,GPR68,GRN,BDNF,VDR,VEGFA
GO: Biological Process	GO:0043406	positive regulation of MAP kinase activity	4.221e-05	0.1105	0.0005311	0.004487	5	232	BMP2,INSR,TNFRSF11A,FGF18,VEGFA
GO: Biological Process	GO:0006915	apoptotic process	4.317e-05	0.113	0.0005406	0.004567	12	1934	CITED2,IL11,BMP2,IL18,IGF1R,CD44,AKT1,TNFRSF11A,IHH,BDNF,VDR,VEGFA
GO: Biological Process	GO:0034112	positive regulation of homotypic cell-cell adhesion	4.673e-05	0.1223	0.0005823	0.004919	5	237	IL18,CD44,AKT1,IHH,VCAM1
GO: Biological Process	GO:0006468	protein phosphorylation	4.783e-05	0.1252	0.0005932	0.005011	12	1954	IL11,BMP2,IL18,IGF1R,CALM1,INSR,CD44,AKT1,TNFRSF11A,FGF18,BDNF,VEGFA
GO: Biological Process	GO:0016337	single organismal cell-cell adhesion	4.827e-05	0.1263	0.0005953	0.005029	8	810	CITED2,BMP2,IL18,CD44,AKT1,IHH,VCAM1,VEGFA
GO: Biological Process	GO:0010629	negative regulation of gene expression	4.845e-05	0.1268	0.0005953	0.005029	11	1635	CITED2,BMP2,IGF1R,NACC1,ETV7,INSR,AKT1,NOS2,PTHLH,VDR,VEGFA
GO: Biological Process	GO:0035924	cellular response to vascular endothelial growth factor stimulus	4.927e-05	0.1289	0.0006025	0.005089	3	42	AKT1,VCAM1,VEGFA
GO: Biological Process	GO:0051090	regulation of sequence-specific DNA binding transcription factor activity	4.95e-05	0.1295	0.0006025	0.005089	6	398	IGF1R,AKT1,TNFRSF11A,PTHLH,BDNF,VEGFA
GO: Biological Process	GO:0012501	programmed cell death	5.006e-05	0.131	0.0006065	0.005124	12	1963	CITED2,IL11,BMP2,IL18,IGF1R,CD44,AKT1,TNFRSF11A,IHH,BDNF,VDR,VEGFA
GO: Biological Process	GO:1903039	positive regulation of leukocyte cell-cell adhesion	5.06e-05	0.1324	0.0006102	0.005154	5	241	IL18,CD44,AKT1,IHH,VCAM1
GO: Biological Process	GO:0001935	endothelial cell proliferation	5.29e-05	0.1384	0.0006321	0.00534	4	122	BMP2,AKT1,FGF18,VEGFA
GO: Biological Process	GO:0032963	collagen metabolic process	5.29e-05	0.1384	0.0006321	0.00534	4	122	COL10A1,IL18,IHH,MMP13
GO: Biological Process	GO:0046777	protein autophosphorylation	5.471e-05	0.1432	0.0006508	0.005497	5	245	IGF1R,CALM1,INSR,AKT1,VEGFA
GO: Biological Process	GO:0034097	response to cytokine	5.497e-05	0.1439	0.000651	0.005499	8	825	KCNJ11,INSR,CD44,AKT1,TNFRSF11A,NOS2,ADIPOR2,VCAM1
GO: Biological Process	GO:0072521	purine-containing compound metabolic process	5.792e-05	0.1516	0.0006828	0.005767	7	605	NPR3,CALM1,INSR,NOS2,PTHLH,BDNF,VEGFA
GO: Biological Process	GO:0033029	regulation of neutrophil apoptotic process	5.872e-05	0.1537	0.0006892	0.005821	2	7	IL18,CD44
GO: Biological Process	GO:0044259	multicellular organismal macromolecule metabolic process	6.187e-05	0.1619	0.0007229	0.006106	4	127	COL10A1,IL18,IHH,MMP13
GO: Biological Process	GO:0003007	heart morphogenesis	6.253e-05	0.1636	0.0007273	0.006144	5	252	CITED2,BMP2,INSR,IHH,VEGFA
GO: Biological Process	GO:0043549	regulation of kinase activity	6.349e-05	0.1661	0.000735	0.006209	8	842	BMP2,IGF1R,CALM1,INSR,AKT1,TNFRSF11A,FGF18,VEGFA
GO: Biological Process	GO:0008585	female gonad development	6.379e-05	0.1669	0.000735	0.006209	4	128	INSR,MMP13,NOS2,VEGFA
GO: Biological Process	GO:0045944	positive regulation of transcription from RNA polymerase II promoter	6.404e-05	0.1676	0.000735	0.006209	9	1099	CITED2,IL11,BMP2,FOSL2,AKT1,IHH,SP7,VDR,VEGFA
GO: Biological Process	GO:0048660	regulation of smooth muscle cell proliferation	6.776e-05	0.1773	0.0007744	0.006541	4	130	NPR3,IL18,IGF1R,VEGFA
GO: Biological Process	GO:0008406	gonad development	6.862e-05	0.1796	0.0007805	0.006593	5	257	CITED2,INSR,MMP13,NOS2,VEGFA
GO: Biological Process	GO:0038083	peptidyl-tyrosine autophosphorylation	6.919e-05	0.1811	0.0007805	0.006593	3	47	IGF1R,INSR,VEGFA
GO: Biological Process	GO:0046326	positive regulation of glucose import	6.919e-05	0.1811	0.0007805	0.006593	3	47	INSR,AKT1,ADIPOR2
GO: Biological Process	GO:0046545	development of primary female sexual characteristics	7.405e-05	0.1938	0.0008308	0.007018	4	133	INSR,MMP13,NOS2,VEGFA
GO: Biological Process	GO:0051270	regulation of cellular component movement	7.428e-05	0.1944	0.0008308	0.007018	8	861	CITED2,BMP2,IL18,IGF1R,INSR,AKT1,FGF18,VEGFA
GO: Biological Process	GO:0045137	development of primary sexual characteristics	7.517e-05	0.1967	0.0008371	0.007071	5	262	CITED2,INSR,MMP13,NOS2,VEGFA
GO: Biological Process	GO:0098602	single organism cell adhesion	7.612e-05	0.1992	0.0008418	0.007111	8	864	CITED2,BMP2,IL18,CD44,AKT1,IHH,VCAM1,VEGFA
GO: Biological Process	GO:0048659	smooth muscle cell proliferation	7.624e-05	0.1995	0.0008418	0.007111	4	134	NPR3,IL18,IGF1R,VEGFA
GO: Biological Process	GO:0018105	peptidyl-serine phosphorylation	7.792e-05	0.2039	0.000854	0.007214	5	264	IL11,CD44,AKT1,BDNF,VEGFA
GO: Biological Process	GO:0040012	regulation of locomotion	7.8e-05	0.2041	0.000854	0.007214	8	867	CITED2,BMP2,IL18,IGF1R,INSR,AKT1,FGF18,VEGFA
GO: Biological Process	GO:0032330	regulation of chondrocyte differentiation	7.844e-05	0.2053	0.0008553	0.007225	3	49	IHH,PTHLH,FGF18
GO: Biological Process	GO:0071333	cellular response to glucose stimulus	8.075e-05	0.2113	0.0008769	0.007407	4	136	IGF1R,GPR68,KCNJ11,VCAM1
GO: Biological Process	GO:0050999	regulation of nitric-oxide synthase activity	8.335e-05	0.2181	0.0009013	0.007614	3	50	NPR3,CALM1,AKT1
GO: Biological Process	GO:0071331	cellular response to hexose stimulus	8.546e-05	0.2236	0.0009204	0.007775	4	138	IGF1R,GPR68,KCNJ11,VCAM1
GO: Biological Process	GO:2000027	regulation of organ morphogenesis	8.663e-05	0.2267	0.0009254	0.007817	5	270	CITED2,BMP2,BDNF,VDR,VEGFA
GO: Biological Process	GO:0070372	regulation of ERK1 and ERK2 cascade	8.663e-05	0.2267	0.0009254	0.007817	5	270	BMP2,CD44,TNFRSF11A,FGF18,VEGFA
GO: Biological Process	GO:0042698	ovulation cycle	8.789e-05	0.23	0.0009312	0.007866	4	139	IGF1R,MMP13,NOS2,VEGFA
GO: Biological Process	GO:0071326	cellular response to monosaccharide stimulus	8.789e-05	0.23	0.0009312	0.007866	4	139	IGF1R,GPR68,KCNJ11,VCAM1
GO: Biological Process	GO:0009790	embryo development	8.856e-05	0.2318	0.0009346	0.007895	9	1146	CITED2,BMP2,INSR,AKT1,GRN,IHH,MMP13,VCAM1,VEGFA
GO: Biological Process	GO:0051403	stress-activated MAPK cascade	8.97e-05	0.2347	0.0009427	0.007963	5	272	BMP2,IGF1R,AKT1,TNFRSF11A,VEGFA
GO: Biological Process	GO:0045981	positive regulation of nucleotide metabolic process	9.289e-05	0.2431	0.0009685	0.008181	4	141	CALM1,INSR,NOS2,PTHLH
GO: Biological Process	GO:1900544	positive regulation of purine nucleotide metabolic process	9.289e-05	0.2431	0.0009685	0.008181	4	141	CALM1,INSR,NOS2,PTHLH
GO: Biological Process	GO:0001568	blood vessel development	9.361e-05	0.245	0.0009721	0.008212	7	653	CITED2,IL18,AKT1,IHH,FGF18,ADIPOR2,VEGFA
GO: Biological Process	GO:0030802	regulation of cyclic nucleotide biosynthetic process	9.547e-05	0.2498	0.0009875	0.008342	4	142	NPR3,CALM1,NOS2,PTHLH
GO: Biological Process	GO:0031098	stress-activated protein kinase signaling cascade	9.94e-05	0.2601	0.00102	0.008617	5	278	BMP2,IGF1R,AKT1,TNFRSF11A,VEGFA
GO: Biological Process	GO:0018209	peptidyl-serine modification	9.94e-05	0.2601	0.00102	0.008617	5	278	IL11,CD44,AKT1,BDNF,VEGFA
GO: Biological Process	GO:0001781	neutrophil apoptotic process	0.0001005	0.2629	0.001022	0.008635	2	9	IL18,CD44
GO: Biological Process	GO:0072006	nephron development	0.0001008	0.2638	0.001022	0.008635	4	144	CITED2,BMP2,CD44,VEGFA
GO: Biological Process	GO:0031214	biomineral tissue development	0.0001008	0.2638	0.001022	0.008635	4	144	BMP2,MGP,MMP13,PTHLH
GO: Biological Process	GO:0044236	multicellular organism metabolic process	0.0001035	0.2709	0.001046	0.008836	4	145	COL10A1,IL18,IHH,MMP13
GO: Biological Process	GO:0051347	positive regulation of transferase activity	0.0001049	0.2745	0.001053	0.008893	7	665	BMP2,CALM1,INSR,AKT1,TNFRSF11A,FGF18,VEGFA
GO: Biological Process	GO:0010828	positive regulation of glucose transport	0.000105	0.2748	0.001053	0.008893	3	54	INSR,AKT1,ADIPOR2
GO: Biological Process	GO:0048872	homeostasis of number of cells	0.0001063	0.2782	0.001062	0.008969	5	282	CITED2,IL18,CD44,AKT1,VEGFA
GO: Biological Process	GO:1902531	regulation of intracellular signal transduction	0.0001087	0.2845	0.001082	0.009139	11	1786	IL11,BMP2,IL18,IGF1R,CALM1,INSR,CD44,AKT1,TNFRSF11A,FGF18,VEGFA
GO: Biological Process	GO:0030855	epithelial cell differentiation	0.0001099	0.2876	0.00109	0.009204	7	670	BMP2,FOSL2,AKT1,IHH,PTHLH,VDR,VEGFA
GO: Biological Process	GO:0070371	ERK1 and ERK2 cascade	0.0001117	0.2924	0.001102	0.009312	5	285	BMP2,CD44,TNFRSF11A,FGF18,VEGFA
GO: Biological Process	GO:0046660	female sex differentiation	0.0001121	0.2932	0.001102	0.009312	4	148	INSR,MMP13,NOS2,VEGFA
GO: Biological Process	GO:0071322	cellular response to carbohydrate stimulus	0.000115	0.301	0.001123	0.009486	4	149	IGF1R,GPR68,KCNJ11,VCAM1
GO: Biological Process	GO:2000241	regulation of reproductive process	0.000115	0.301	0.001123	0.009486	4	149	CITED2,IL18,IGF1R,INSR
GO: Biological Process	GO:0015980	energy derivation by oxidation of organic compounds	0.0001154	0.3021	0.001123	0.009487	5	287	CALM1,INSR,AKT1,NOS2,BDNF
GO: Biological Process	GO:0010463	mesenchymal cell proliferation	0.0001171	0.3064	0.001135	0.009584	3	56	BMP2,IHH,VEGFA
GO: Biological Process	GO:0001944	vasculature development	0.0001205	0.3155	0.001164	0.009833	7	680	CITED2,IL18,AKT1,IHH,FGF18,ADIPOR2,VEGFA
GO: Biological Process	GO:1900371	regulation of purine nucleotide biosynthetic process	0.0001211	0.3169	0.001165	0.009841	4	151	NPR3,CALM1,NOS2,PTHLH
GO: Biological Process	GO:0030808	regulation of nucleotide biosynthetic process	0.0001242	0.325	0.001186	0.01002	4	152	NPR3,CALM1,NOS2,PTHLH
GO: Biological Process	GO:0002262	myeloid cell homeostasis	0.0001242	0.325	0.001186	0.01002	4	152	CITED2,IL18,CD44,VEGFA
GO: Biological Process	GO:0001822	kidney development	0.0001272	0.3329	0.00121	0.01022	5	293	CITED2,BMP2,CD44,BDNF,VEGFA
GO: Biological Process	GO:0022612	gland morphogenesis	0.0001306	0.3419	0.001239	0.01046	4	154	IGF1R,CD44,PTHLH,VDR
GO: Biological Process	GO:0009117	nucleotide metabolic process	0.0001368	0.3581	0.001293	0.01092	7	694	NPR3,CALM1,INSR,NOS2,PTHLH,BDNF,VEGFA
GO: Biological Process	GO:0052652	cyclic purine nucleotide metabolic process	0.0001407	0.3682	0.001325	0.01119	4	157	NPR3,CALM1,NOS2,PTHLH
GO: Biological Process	GO:0043009	chordate embryonic development	0.0001418	0.3711	0.00133	0.01123	7	698	CITED2,BMP2,AKT1,GRN,IHH,VCAM1,VEGFA
GO: Biological Process	GO:0048568	embryonic organ development	0.0001438	0.3762	0.001333	0.01126	6	483	CITED2,BMP2,AKT1,IHH,VCAM1,VEGFA
GO: Biological Process	GO:0046890	regulation of lipid biosynthetic process	0.0001442	0.3774	0.001333	0.01126	4	158	BMP2,IGF1R,AKT1,VDR
GO: Biological Process	GO:0001678	cellular glucose homeostasis	0.0001442	0.3774	0.001333	0.01126	4	158	IGF1R,GPR68,KCNJ11,VCAM1
GO: Biological Process	GO:0009190	cyclic nucleotide biosynthetic process	0.0001442	0.3774	0.001333	0.01126	4	158	NPR3,CALM1,NOS2,PTHLH
GO: Biological Process	GO:0007169	transmembrane receptor protein tyrosine kinase signaling pathway	0.0001469	0.3844	0.001354	0.01143	7	702	BMP2,IGF1R,INSR,AKT1,FGF18,BDNF,VEGFA
GO: Biological Process	GO:0006753	nucleoside phosphate metabolic process	0.0001495	0.3913	0.001373	0.0116	7	704	NPR3,CALM1,INSR,NOS2,PTHLH,BDNF,VEGFA
GO: Biological Process	GO:0031017	exocrine pancreas development	0.0001531	0.4008	0.0014	0.01182	2	11	IGF1R,INSR
GO: Biological Process	GO:0009792	embryo development ending in birth or egg hatching	0.0001535	0.4017	0.0014	0.01182	7	707	CITED2,BMP2,AKT1,GRN,IHH,VCAM1,VEGFA
GO: Biological Process	GO:0022408	negative regulation of cell-cell adhesion	0.000155	0.4057	0.001404	0.01186	4	161	BMP2,CD44,IHH,VEGFA
GO: Biological Process	GO:0043491	protein kinase B signaling	0.000155	0.4057	0.001404	0.01186	4	161	IGF1R,INSR,AKT1,VEGFA
GO: Biological Process	GO:0071345	cellular response to cytokine stimulus	0.0001617	0.4233	0.00146	0.01233	7	713	KCNJ11,CD44,AKT1,TNFRSF11A,NOS2,ADIPOR2,VCAM1
GO: Biological Process	GO:0032844	regulation of homeostatic process	0.0001661	0.4348	0.001494	0.01262	6	496	IL18,CALM1,GPR68,CD44,TNFRSF11A,VEGFA
GO: Biological Process	GO:0072001	renal system development	0.000168	0.4397	0.001506	0.01272	5	311	CITED2,BMP2,CD44,BDNF,VEGFA
GO: Biological Process	GO:0008285	negative regulation of cell proliferation	0.0001689	0.4419	0.001508	0.01274	7	718	BMP2,NPR3,CD44,IHH,PTHLH,BDNF,VDR
GO: Biological Process	GO:0001890	placenta development	0.0001743	0.4563	0.001552	0.01311	4	166	CITED2,AKT1,VCAM1,VDR
GO: Biological Process	GO:0040008	regulation of growth	0.0001778	0.4652	0.001577	0.01332	7	724	INSR,CD44,AKT1,IHH,ADIPOR2,BDNF,VEGFA
GO: Biological Process	GO:0007548	sex differentiation	0.0001783	0.4667	0.001577	0.01332	5	315	CITED2,INSR,MMP13,NOS2,VEGFA
GO: Biological Process	GO:0002684	positive regulation of immune system process	0.0001828	0.4783	0.00161	0.0136	8	980	IL18,GPR68,CD44,AKT1,IHH,NOS2,VCAM1,VEGFA
GO: Biological Process	GO:0098609	cell-cell adhesion	0.0001893	0.4953	0.001662	0.01404	8	985	CITED2,BMP2,IL18,CD44,AKT1,IHH,VCAM1,VEGFA
GO: Biological Process	GO:0060284	regulation of cell development	0.0001946	0.5093	0.001703	0.01439	8	989	BMP2,IGF1R,GPR68,AKT1,GRN,BDNF,VDR,VEGFA
GO: Biological Process	GO:0070661	leukocyte proliferation	0.0001975	0.5169	0.001723	0.01455	5	322	NPR3,IL18,CD44,IHH,VCAM1
GO: Biological Process	GO:0050810	regulation of steroid biosynthetic process	0.0001997	0.5227	0.001731	0.01462	3	67	BMP2,IGF1R,VDR
GO: Biological Process	GO:0072089	stem cell proliferation	0.0001998	0.5228	0.001731	0.01462	4	172	BMP2,IHH,BDNF,VEGFA
GO: Biological Process	GO:0043085	positive regulation of catalytic activity	0.0002066	0.5406	0.001783	0.01506	10	1588	BMP2,NPR3,CALM1,INSR,AKT1,TNFRSF11A,NOS2,FGF18,VDR,VEGFA
GO: Biological Process	GO:0055114	oxidation-reduction process	0.0002071	0.542	0.001783	0.01506	8	998	BMP2,CALM1,INSR,AKT1,NOS2,ADIPOR2,BDNF,VCAM1
GO: Biological Process	GO:0006357	regulation of transcription from RNA polymerase II promoter	0.0002101	0.5498	0.001803	0.01523	11	1922	CITED2,IL11,BMP2,SOST,FOSL2,ETV7,AKT1,IHH,SP7,VDR,VEGFA
GO: Biological Process	GO:0042129	regulation of T cell proliferation	0.0002135	0.5586	0.001825	0.01542	4	175	IL18,CD44,IHH,VCAM1
GO: Biological Process	GO:2001028	positive regulation of endothelial cell chemotaxis	0.0002167	0.5672	0.001835	0.0155	2	13	FGF18,VEGFA
GO: Biological Process	GO:0043129	surfactant homeostasis	0.0002167	0.5672	0.001835	0.0155	2	13	PTHLH,VEGFA
GO: Biological Process	GO:0033690	positive regulation of osteoblast proliferation	0.0002167	0.5672	0.001835	0.0155	2	13	BMP2,IGF1R
GO: Biological Process	GO:0032103	positive regulation of response to external stimulus	0.0002182	0.5711	0.001835	0.0155	5	329	IL18,IGF1R,TNFRSF11A,FGF18,VEGFA
GO: Biological Process	GO:0050863	regulation of T cell activation	0.0002182	0.5711	0.001835	0.0155	5	329	IL18,CD44,AKT1,IHH,VCAM1
GO: Biological Process	GO:0051338	regulation of transferase activity	0.0002188	0.5725	0.001835	0.0155	8	1006	BMP2,IGF1R,CALM1,INSR,AKT1,TNFRSF11A,FGF18,VEGFA
GO: Biological Process	GO:0050731	positive regulation of peptidyl-tyrosine phosphorylation	0.0002229	0.5834	0.001858	0.01569	4	177	IL11,IL18,CD44,VEGFA
GO: Biological Process	GO:0048592	eye morphogenesis	0.0002229	0.5834	0.001858	0.01569	4	177	CITED2,IHH,BDNF,VEGFA
GO: Biological Process	GO:0002244	hematopoietic progenitor cell differentiation	0.0002327	0.609	0.001933	0.01633	4	179	CITED2,IL11,SP7,VEGFA
GO: Biological Process	GO:0048646	anatomical structure formation involved in morphogenesis	0.000237	0.6201	0.001946	0.01644	9	1304	CITED2,BMP2,IL18,CD44,IHH,PTHLH,FGF18,ADIPOR2,VEGFA
GO: Biological Process	GO:0001938	positive regulation of endothelial cell proliferation	0.0002372	0.6208	0.001946	0.01644	3	71	BMP2,AKT1,VEGFA
GO: Biological Process	GO:0010595	positive regulation of endothelial cell migration	0.0002372	0.6208	0.001946	0.01644	3	71	AKT1,FGF18,VEGFA
GO: Biological Process	GO:0032101	regulation of response to external stimulus	0.0002372	0.6208	0.001946	0.01644	8	1018	IL18,IGF1R,CALM1,CD44,TNFRSF11A,NOS2,FGF18,VEGFA
GO: Biological Process	GO:0055086	nucleobase-containing small molecule metabolic process	0.0002514	0.6578	0.002056	0.01737	7	766	NPR3,CALM1,INSR,NOS2,PTHLH,BDNF,VEGFA
GO: Biological Process	GO:0043117	positive regulation of vascular permeability	0.0002526	0.661	0.002058	0.01738	2	14	IL18,VEGFA
GO: Biological Process	GO:0048771	tissue remodeling	0.0002532	0.6626	0.002058	0.01738	4	183	IL18,IHH,VDR,VEGFA
GO: Biological Process	GO:0032496	response to lipopolysaccharide	0.0002611	0.6833	0.002116	0.01787	5	342	IL18,AKT1,TNFRSF11A,NOS2,VCAM1
GO: Biological Process	GO:1903037	regulation of leukocyte cell-cell adhesion	0.0002646	0.6926	0.002138	0.01806	5	343	IL18,CD44,AKT1,IHH,VCAM1
GO: Biological Process	GO:0006809	nitric oxide biosynthetic process	0.000279	0.73	0.002246	0.01897	3	75	INSR,AKT1,NOS2
GO: Biological Process	GO:0033002	muscle cell proliferation	0.0002806	0.7343	0.002253	0.01903	4	188	NPR3,IL18,IGF1R,VEGFA
GO: Biological Process	GO:0046324	regulation of glucose import	0.0002901	0.7592	0.002288	0.01933	3	76	INSR,AKT1,ADIPOR2
GO: Biological Process	GO:0034110	regulation of homotypic cell-cell adhesion	0.0002905	0.7602	0.002288	0.01933	5	350	IL18,CD44,AKT1,IHH,VCAM1
GO: Biological Process	GO:0035988	chondrocyte proliferation	0.0002911	0.7619	0.002288	0.01933	2	15	GRN,IHH
GO: Biological Process	GO:0045725	positive regulation of glycogen biosynthetic process	0.0002911	0.7619	0.002288	0.01933	2	15	INSR,AKT1
GO: Biological Process	GO:0030238	male sex determination	0.0002911	0.7619	0.002288	0.01933	2	15	IGF1R,INSR
GO: Biological Process	GO:0048875	chemical homeostasis within a tissue	0.0002911	0.7619	0.002288	0.01933	2	15	PTHLH,VEGFA
GO: Biological Process	GO:0001780	neutrophil homeostasis	0.0002911	0.7619	0.002288	0.01933	2	15	IL18,CD44
GO: Biological Process	GO:0010817	regulation of hormone levels	0.000296	0.7747	0.002313	0.01954	6	552	IL11,BMP2,IGF1R,GPR68,KCNJ11,NOS2
GO: Biological Process	GO:0048514	blood vessel morphogenesis	0.000296	0.7747	0.002313	0.01954	6	552	CITED2,IL18,IHH,FGF18,ADIPOR2,VEGFA
GO: Biological Process	GO:0030198	extracellular matrix organization	0.0003061	0.8011	0.002384	0.02014	5	354	COL10A1,CD44,IHH,MMP13,VCAM1
GO: Biological Process	GO:0043062	extracellular structure organization	0.0003101	0.8115	0.002408	0.02034	5	355	COL10A1,CD44,IHH,MMP13,VCAM1
GO: Biological Process	GO:0002237	response to molecule of bacterial origin	0.0003223	0.8436	0.002496	0.02108	5	358	IL18,AKT1,TNFRSF11A,NOS2,VCAM1
GO: Biological Process	GO:0046209	nitric oxide metabolic process	0.0003252	0.851	0.00251	0.02121	3	79	INSR,AKT1,NOS2
GO: Biological Process	GO:1900745	positive regulation of p38MAPK cascade	0.0003324	0.8698	0.002558	0.02161	2	16	BMP2,VEGFA
GO: Biological Process	GO:0061180	mammary gland epithelium development	0.0003375	0.8832	0.002582	0.02181	3	80	AKT1,PTHLH,VDR
GO: Biological Process	GO:0034103	regulation of tissue remodeling	0.0003375	0.8832	0.002582	0.02181	3	80	IL18,VDR,VEGFA
GO: Biological Process	GO:1901654	response to ketone	0.0003618	0.9467	0.00276	0.02332	4	201	CALM1,KCNJ11,INSR,AKT1
GO: Biological Process	GO:0048511	rhythmic process	0.0003658	0.9573	0.002783	0.02351	5	368	IGF1R,TNFRSF11A,MMP13,NOS2,VEGFA
GO: Biological Process	GO:0003018	vascular process in circulatory system	0.0003686	0.9647	0.002796	0.02362	4	202	IL18,AKT1,NOS2,VEGFA
GO: Biological Process	GO:0048661	positive regulation of smooth muscle cell proliferation	0.0003761	0.9842	0.002814	0.02377	3	83	IL18,IGF1R,VEGFA
GO: Biological Process	GO:2001057	reactive nitrogen species metabolic process	0.0003761	0.9842	0.002814	0.02377	3	83	INSR,AKT1,NOS2
GO: Biological Process	GO:0090030	regulation of steroid hormone biosynthetic process	0.0003763	0.9847	0.002814	0.02377	2	17	BMP2,IGF1R
GO: Biological Process	GO:0030157	pancreatic juice secretion	0.0003763	0.9847	0.002814	0.02377	2	17	NPR3,MMP13
GO: Biological Process	GO:0032310	prostaglandin secretion	0.0003763	0.9847	0.002814	0.02377	2	17	TNFRSF11A,NOS2
GO: Biological Process	GO:0009749	response to glucose	0.0003826	1	0.002853	0.0241	4	204	IGF1R,GPR68,KCNJ11,VCAM1
GO: Biological Process	GO:0032940	secretion by cell	0.0003843	1	0.002857	0.02414	8	1093	IL11,CALM1,GPR68,KCNJ11,MMP13,NOS2,BDNF,VEGFA
GO: Biological Process	GO:0032845	negative regulation of homeostatic process	0.000397	1	0.002944	0.02486	4	206	IL18,CALM1,CD44,VEGFA
GO: Biological Process	GO:0030278	regulation of ossification	0.0004044	1	0.002989	0.02525	4	207	BMP2,SOST,MGP,VEGFA
GO: Biological Process	GO:0045666	positive regulation of neuron differentiation	0.0004086	1	0.003012	0.02544	5	377	BMP2,IGF1R,GRN,BDNF,VEGFA
GO: Biological Process	GO:0007584	response to nutrient	0.0004194	1	0.003066	0.0259	4	209	INSR,ADIPOR2,VCAM1,VDR
GO: Biological Process	GO:0048015	phosphatidylinositol-mediated signaling	0.0004194	1	0.003066	0.0259	4	209	NPR3,IGF1R,AKT1,FGF18
GO: Biological Process	GO:0009746	response to hexose	0.0004194	1	0.003066	0.0259	4	209	IGF1R,GPR68,KCNJ11,VCAM1
GO: Biological Process	GO:0070875	positive regulation of glycogen metabolic process	0.0004229	1	0.003083	0.02604	2	18	INSR,AKT1
GO: Biological Process	GO:0046634	regulation of alpha-beta T cell activation	0.0004319	1	0.003139	0.02652	3	87	IL18,CD44,IHH
GO: Biological Process	GO:0048017	inositol lipid-mediated signaling	0.0004426	1	0.003208	0.0271	4	212	NPR3,IGF1R,AKT1,FGF18
GO: Biological Process	GO:0060341	regulation of cellular localization	0.0004448	1	0.003216	0.02716	9	1419	IL11,IL18,CALM1,GPR68,KCNJ11,AKT1,MMP13,NOS2,VEGFA
GO: Biological Process	GO:0005977	glycogen metabolic process	0.0004616	1	0.003292	0.02781	3	89	CALM1,INSR,AKT1
GO: Biological Process	GO:0051897	positive regulation of protein kinase B signaling	0.0004616	1	0.003292	0.02781	3	89	IGF1R,INSR,VEGFA
GO: Biological Process	GO:0046323	glucose import	0.0004616	1	0.003292	0.02781	3	89	INSR,AKT1,ADIPOR2
GO: Biological Process	GO:0031279	regulation of cyclase activity	0.0004616	1	0.003292	0.02781	3	89	NPR3,CALM1,NOS2
GO: Biological Process	GO:0035050	embryonic heart tube development	0.0004616	1	0.003292	0.02781	3	89	CITED2,BMP2,IHH
GO: Biological Process	GO:0002573	myeloid leukocyte differentiation	0.0004667	1	0.003319	0.02803	4	215	CITED2,GPR68,TNFRSF11A,VEGFA
GO: Biological Process	GO:0030099	myeloid cell differentiation	0.0004714	1	0.003337	0.02818	5	389	CITED2,IL11,GPR68,TNFRSF11A,VEGFA
GO: Biological Process	GO:2001026	regulation of endothelial cell chemotaxis	0.0004721	1	0.003337	0.02818	2	19	FGF18,VEGFA
GO: Biological Process	GO:0010563	negative regulation of phosphorus metabolic process	0.0004743	1	0.003337	0.02818	6	603	NPR3,IL18,IGF1R,CALM1,INSR,AKT1
GO: Biological Process	GO:0045936	negative regulation of phosphate metabolic process	0.0004743	1	0.003337	0.02818	6	603	NPR3,IL18,IGF1R,CALM1,INSR,AKT1
GO: Biological Process	GO:0044042	glucan metabolic process	0.000477	1	0.003338	0.02819	3	90	CALM1,INSR,AKT1
GO: Biological Process	GO:0006073	cellular glucan metabolic process	0.000477	1	0.003338	0.02819	3	90	CALM1,INSR,AKT1
GO: Biological Process	GO:0042098	T cell proliferation	0.0004832	1	0.003363	0.02841	4	217	IL18,CD44,IHH,VCAM1
GO: Biological Process	GO:0034284	response to monosaccharide	0.0004832	1	0.003363	0.02841	4	217	IGF1R,GPR68,KCNJ11,VCAM1
GO: Biological Process	GO:0015908	fatty acid transport	0.0004927	1	0.003411	0.02881	3	91	AKT1,TNFRSF11A,NOS2
GO: Biological Process	GO:0051339	regulation of lyase activity	0.0004927	1	0.003411	0.02881	3	91	NPR3,CALM1,NOS2
GO: Biological Process	GO:0051241	negative regulation of multicellular organismal process	0.000495	1	0.003418	0.02887	8	1135	BMP2,SOST,GPR68,CD44,IHH,PTHLH,BDNF,VEGFA
GO: Biological Process	GO:0006091	generation of precursor metabolites and energy	0.0005055	1	0.003481	0.02941	5	395	CALM1,INSR,AKT1,NOS2,BDNF
GO: Biological Process	GO:1902106	negative regulation of leukocyte differentiation	0.0005087	1	0.003494	0.02952	3	92	GPR68,CD44,IHH
GO: Biological Process	GO:0015732	prostaglandin transport	0.000524	1	0.003571	0.03017	2	20	TNFRSF11A,NOS2
GO: Biological Process	GO:0030949	positive regulation of vascular endothelial growth factor receptor signaling pathway	0.000524	1	0.003571	0.03017	2	20	FGF18,VEGFA
GO: Biological Process	GO:0051446	positive regulation of meiotic cell cycle	0.000524	1	0.003571	0.03017	2	20	IGF1R,INSR
GO: Biological Process	GO:0010243	response to organonitrogen compound	0.0005321	1	0.003617	0.03055	7	867	IL18,IGF1R,CALM1,KCNJ11,INSR,AKT1,VCAM1
GO: Biological Process	GO:0050670	regulation of lymphocyte proliferation	0.0005355	1	0.003631	0.03067	4	223	IL18,CD44,IHH,VCAM1
GO: Biological Process	GO:0030324	lung development	0.0005538	1	0.003735	0.03155	4	225	MGP,PTHLH,FGF18,VEGFA
GO: Biological Process	GO:0032944	regulation of mononuclear cell proliferation	0.0005538	1	0.003735	0.03155	4	225	IL18,CD44,IHH,VCAM1
GO: Biological Process	GO:0034109	homotypic cell-cell adhesion	0.0005663	1	0.00381	0.03218	5	405	IL18,CD44,AKT1,IHH,VCAM1
GO: Biological Process	GO:0044092	negative regulation of molecular function	0.0005725	1	0.003842	0.03245	8	1160	NPR3,IGF1R,CALM1,INSR,CD44,AKT1,PTHLH,VEGFA
GO: Biological Process	GO:0043154	negative regulation of cysteine-type endopeptidase activity involved in apoptotic process	0.0005761	1	0.003846	0.03249	3	96	CD44,AKT1,VEGFA
GO: Biological Process	GO:0019218	regulation of steroid metabolic process	0.0005761	1	0.003846	0.03249	3	96	BMP2,IGF1R,VDR
GO: Biological Process	GO:0032332	positive regulation of chondrocyte differentiation	0.0005786	1	0.003853	0.03254	2	21	IHH,FGF18
GO: Biological Process	GO:0097190	apoptotic signaling pathway	0.0005879	1	0.003905	0.03298	6	628	IL18,CD44,AKT1,TNFRSF11A,VDR,VEGFA
GO: Biological Process	GO:0030323	respiratory tube development	0.0005917	1	0.00392	0.03311	4	229	MGP,PTHLH,FGF18,VEGFA
GO: Biological Process	GO:0019637	organophosphate metabolic process	0.0005959	1	0.003938	0.03326	8	1167	NPR3,CALM1,INSR,NOS2,PTHLH,FGF18,BDNF,VEGFA
GO: Biological Process	GO:0019725	cellular homeostasis	0.0006098	1	0.00402	0.03396	7	887	IGF1R,CALM1,GPR68,KCNJ11,NOS2,VCAM1,VDR
GO: Biological Process	GO:0050870	positive regulation of T cell activation	0.0006213	1	0.004085	0.03451	4	232	IL18,AKT1,IHH,VCAM1
GO: Biological Process	GO:2000117	negative regulation of cysteine-type endopeptidase activity	0.0006303	1	0.004134	0.03492	3	99	CD44,AKT1,VEGFA
GO: Biological Process	GO:0060749	mammary gland alveolus development	0.0006357	1	0.004139	0.03496	2	22	TNFRSF11A,VEGFA
GO: Biological Process	GO:0044849	estrous cycle	0.0006357	1	0.004139	0.03496	2	22	IGF1R,MMP13
GO: Biological Process	GO:0061377	mammary gland lobule development	0.0006357	1	0.004139	0.03496	2	22	TNFRSF11A,VEGFA
GO: Biological Process	GO:0001892	embryonic placenta development	0.000649	1	0.004204	0.03551	3	100	CITED2,AKT1,VCAM1
GO: Biological Process	GO:0043467	regulation of generation of precursor metabolites and energy	0.000649	1	0.004204	0.03551	3	100	INSR,AKT1,NOS2
GO: Biological Process	GO:0070663	regulation of leukocyte proliferation	0.0006519	1	0.004213	0.03559	4	235	IL18,CD44,IHH,VCAM1
GO: Biological Process	GO:0060537	muscle tissue development	0.0006605	1	0.004258	0.03596	5	419	CITED2,BMP2,IHH,BDNF,VEGFA
GO: Biological Process	GO:0009612	response to mechanical stimulus	0.0006624	1	0.004259	0.03598	4	236	SOST,IL18,AKT1,MMP13
GO: Biological Process	GO:0009968	negative regulation of signal transduction	0.000667	1	0.004275	0.03611	8	1187	BMP2,SOST,IGF1R,CALM1,CD44,AKT1,IHH,VEGFA
GO: Biological Process	GO:2000379	positive regulation of reactive oxygen species metabolic process	0.0006681	1	0.004275	0.03611	3	101	IL18,INSR,AKT1
GO: Biological Process	GO:0051248	negative regulation of protein metabolic process	0.0006707	1	0.004281	0.03616	8	1188	IL18,IGF1R,CALM1,INSR,CD44,AKT1,NOS2,VEGFA
GO: Biological Process	GO:0001776	leukocyte homeostasis	0.0006876	1	0.004378	0.03698	3	102	IL18,CD44,AKT1
GO: Biological Process	GO:0006925	inflammatory cell apoptotic process	0.0006955	1	0.004418	0.03732	2	23	IL18,CD44
GO: Biological Process	GO:0050730	regulation of peptidyl-tyrosine phosphorylation	0.0007054	1	0.00445	0.03759	4	240	IL11,IL18,CD44,VEGFA
GO: Biological Process	GO:0006112	energy reserve metabolic process	0.0007074	1	0.00445	0.03759	3	103	CALM1,INSR,AKT1
GO: Biological Process	GO:0022600	digestive system process	0.0007074	1	0.00445	0.03759	3	103	NPR3,MMP13,VDR
GO: Biological Process	GO:0030804	positive regulation of cyclic nucleotide biosynthetic process	0.0007074	1	0.00445	0.03759	3	103	CALM1,NOS2,PTHLH
GO: Biological Process	GO:0045934	negative regulation of nucleobase-containing compound metabolic process	0.0007114	1	0.004465	0.03771	9	1513	CITED2,BMP2,NPR3,IGF1R,NACC1,ETV7,PTHLH,VDR,VEGFA
GO: Biological Process	GO:0002682	regulation of immune system process	0.0007148	1	0.004475	0.03781	9	1514	IL18,CALM1,GPR68,CD44,AKT1,IHH,NOS2,VCAM1,VEGFA
GO: Biological Process	GO:0001933	negative regulation of protein phosphorylation	0.0007194	1	0.004493	0.03795	5	427	IL18,IGF1R,CALM1,INSR,AKT1
GO: Biological Process	GO:1903409	reactive oxygen species biosynthetic process	0.0007275	1	0.004512	0.03812	3	104	INSR,AKT1,NOS2
GO: Biological Process	GO:0032846	positive regulation of homeostatic process	0.0007276	1	0.004512	0.03812	4	242	CALM1,GPR68,CD44,TNFRSF11A
GO: Biological Process	GO:0009743	response to carbohydrate	0.0007276	1	0.004512	0.03812	4	242	IGF1R,GPR68,KCNJ11,VCAM1
GO: Biological Process	GO:0045664	regulation of neuron differentiation	0.0007451	1	0.00461	0.03894	6	657	BMP2,IGF1R,AKT1,GRN,BDNF,VEGFA
GO: Biological Process	GO:0046697	decidualization	0.000758	1	0.004678	0.03952	2	24	CITED2,VDR
GO: Biological Process	GO:0061061	muscle structure development	0.0007814	1	0.004812	0.04064	6	663	CITED2,BMP2,IL18,AKT1,BDNF,VEGFA
GO: Biological Process	GO:0044264	cellular polysaccharide metabolic process	0.0007902	1	0.004855	0.04101	3	107	CALM1,INSR,AKT1
GO: Biological Process	GO:0051091	positive regulation of sequence-specific DNA binding transcription factor activity	0.0008215	1	0.005032	0.04251	4	250	AKT1,TNFRSF11A,BDNF,VEGFA
GO: Biological Process	GO:0031954	positive regulation of protein autophosphorylation	0.000823	1	0.005032	0.04251	2	25	CALM1,VEGFA
GO: Biological Process	GO:0010634	positive regulation of epithelial cell migration	0.0008563	1	0.005199	0.04392	3	110	AKT1,FGF18,VEGFA
GO: Biological Process	GO:1900373	positive regulation of purine nucleotide biosynthetic process	0.0008563	1	0.005199	0.04392	3	110	CALM1,NOS2,PTHLH
GO: Biological Process	GO:0030810	positive regulation of nucleotide biosynthetic process	0.0008563	1	0.005199	0.04392	3	110	CALM1,NOS2,PTHLH
GO: Biological Process	GO:0001558	regulation of cell growth	0.0008662	1	0.005248	0.04433	5	445	CD44,AKT1,ADIPOR2,BDNF,VEGFA
GO: Biological Process	GO:0007162	negative regulation of cell adhesion	0.0008715	1	0.005267	0.0445	4	254	BMP2,CD44,IHH,VEGFA
GO: Biological Process	GO:0022602	ovulation cycle process	0.0008791	1	0.005301	0.04478	3	111	MMP13,NOS2,VEGFA
GO: Biological Process	GO:0060326	cell chemotaxis	0.0008844	1	0.00532	0.04494	4	255	TNFRSF11A,FGF18,VCAM1,VEGFA
GO: Biological Process	GO:0060039	pericardium development	0.0008906	1	0.005346	0.04516	2	26	BMP2,VCAM1
GO: Biological Process	GO:0051249	regulation of lymphocyte activation	0.0008927	1	0.005346	0.04516	5	448	IL18,CD44,AKT1,IHH,VCAM1
GO: Biological Process	GO:0090287	regulation of cellular response to growth factor stimulus	0.0008973	1	0.005349	0.04519	4	256	CITED2,SOST,FGF18,VEGFA
GO: Biological Process	GO:0009152	purine ribonucleotide biosynthetic process	0.0008973	1	0.005349	0.04519	4	256	NPR3,CALM1,NOS2,PTHLH
GO: Biological Process	GO:0060541	respiratory system development	0.0009237	1	0.005494	0.04641	4	258	MGP,PTHLH,FGF18,VEGFA
GO: Biological Process	GO:0048589	developmental growth	0.0009263	1	0.005497	0.04644	6	685	INSR,IHH,MMP13,PTHLH,BDNF,VEGFA
GO: Biological Process	GO:0072091	regulation of stem cell proliferation	0.0009497	1	0.00561	0.04739	3	114	IHH,BDNF,VEGFA
GO: Biological Process	GO:0030801	positive regulation of cyclic nucleotide metabolic process	0.0009497	1	0.00561	0.04739	3	114	CALM1,NOS2,PTHLH
GO: Biological Process	GO:0035767	endothelial cell chemotaxis	0.0009609	1	0.005651	0.04773	2	27	FGF18,VEGFA
GO: Biological Process	GO:0043536	positive regulation of blood vessel endothelial cell migration	0.0009609	1	0.005651	0.04773	2	27	AKT1,VEGFA
GO: Biological Process	GO:0019932	second-messenger-mediated signaling	0.0009642	1	0.005658	0.04779	4	261	NPR3,CALM1,NOS2,VCAM1
GO: Biological Process	GO:1905114	cell surface receptor signaling pathway involved in cell-cell signaling	0.000974	1	0.005702	0.04817	3	115	BMP2,AKT1,BDNF
GO: Biological Process	GO:0006164	purine nucleotide biosynthetic process	0.000978	1	0.005713	0.04826	4	262	NPR3,CALM1,NOS2,PTHLH
GO: Biological Process	GO:0072593	reactive oxygen species metabolic process	0.0009919	1	0.005781	0.04884	4	263	IL18,INSR,AKT1,NOS2
GO: Biological Process	GO:0045892	negative regulation of transcription, DNA-templated	0.001014	1	0.005895	0.04979	8	1265	CITED2,BMP2,IGF1R,NACC1,ETV7,PTHLH,VDR,VEGFA
GO: Biological Process	GO:1901522	positive regulation of transcription from RNA polymerase II promoter involved in cellular response to chemical stimulus	0.001034	1	0.005985	0.05056	2	28	BMP2,VEGFA
GO: Biological Process	GO:0046885	regulation of hormone biosynthetic process	0.001034	1	0.005985	0.05056	2	28	BMP2,IGF1R
GO: Biological Process	GO:0034612	response to tumor necrosis factor	0.001049	1	0.00606	0.05119	4	267	KCNJ11,INSR,TNFRSF11A,VCAM1
GO: Biological Process	GO:0009611	response to wounding	0.001054	1	0.006065	0.05124	7	973	IL18,IGF1R,CD44,AKT1,TNFRSF11A,NOS2,ADIPOR2
GO: Biological Process	GO:0001525	angiogenesis	0.001055	1	0.006065	0.05124	5	465	IL18,IHH,FGF18,ADIPOR2,VEGFA
GO: Biological Process	GO:0050769	positive regulation of neurogenesis	0.001075	1	0.006144	0.0519	5	467	BMP2,IGF1R,GRN,BDNF,VEGFA
GO: Biological Process	GO:0010594	regulation of endothelial cell migration	0.001075	1	0.006144	0.0519	3	119	AKT1,FGF18,VEGFA
GO: Biological Process	GO:0010827	regulation of glucose transport	0.001075	1	0.006144	0.0519	3	119	INSR,AKT1,ADIPOR2
GO: Biological Process	GO:0009260	ribonucleotide biosynthetic process	0.001078	1	0.006148	0.05194	4	269	NPR3,CALM1,NOS2,PTHLH
GO: Biological Process	GO:0032967	positive regulation of collagen biosynthetic process	0.001109	1	0.006296	0.05318	2	29	IL18,IHH
GO: Biological Process	GO:0046636	negative regulation of alpha-beta T cell activation	0.001109	1	0.006296	0.05318	2	29	CD44,IHH
GO: Biological Process	GO:1901698	response to nitrogen compound	0.001112	1	0.006301	0.05323	7	982	IL18,IGF1R,CALM1,KCNJ11,INSR,AKT1,VCAM1
GO: Biological Process	GO:0031327	negative regulation of cellular biosynthetic process	0.001118	1	0.006319	0.05338	9	1611	CITED2,BMP2,NPR3,IGF1R,NACC1,ETV7,PTHLH,VDR,VEGFA
GO: Biological Process	GO:0071887	leukocyte apoptotic process	0.001128	1	0.006349	0.05363	3	121	IL18,CD44,AKT1
GO: Biological Process	GO:0005976	polysaccharide metabolic process	0.001128	1	0.006349	0.05363	3	121	CALM1,INSR,AKT1
GO: Biological Process	GO:0046649	lymphocyte activation	0.001132	1	0.006356	0.05369	6	712	IL11,IL18,CD44,AKT1,IHH,VCAM1
GO: Biological Process	GO:0046390	ribose phosphate biosynthetic process	0.001139	1	0.006382	0.05391	4	273	NPR3,CALM1,NOS2,PTHLH
GO: Biological Process	GO:0042326	negative regulation of phosphorylation	0.001149	1	0.006423	0.05426	5	474	IL18,IGF1R,CALM1,INSR,AKT1
GO: Biological Process	GO:0072522	purine-containing compound biosynthetic process	0.001154	1	0.006433	0.05434	4	274	NPR3,CALM1,NOS2,PTHLH
GO: Biological Process	GO:0030817	regulation of cAMP biosynthetic process	0.001155	1	0.006433	0.05434	3	122	NPR3,CALM1,PTHLH
GO: Biological Process	GO:0045927	positive regulation of growth	0.00117	1	0.006458	0.05455	4	275	INSR,AKT1,BDNF,VEGFA
GO: Biological Process	GO:1903034	regulation of response to wounding	0.00117	1	0.006458	0.05455	5	476	IL18,IGF1R,CD44,TNFRSF11A,NOS2
GO: Biological Process	GO:0007186	G-protein coupled receptor signaling pathway	0.001181	1	0.006458	0.05455	8	1295	NPR3,CALM1,GPR68,INSR,AKT1,PTHLH,ADIPOR2,BDNF
GO: Biological Process	GO:0045598	regulation of fat cell differentiation	0.001183	1	0.006458	0.05455	3	123	BMP2,AKT1,VEGFA
GO: Biological Process	GO:0010714	positive regulation of collagen metabolic process	0.001187	1	0.006458	0.05455	2	30	IL18,IHH
GO: Biological Process	GO:1900744	regulation of p38MAPK cascade	0.001187	1	0.006458	0.05455	2	30	BMP2,VEGFA
GO: Biological Process	GO:0044253	positive regulation of multicellular organismal metabolic process	0.001187	1	0.006458	0.05455	2	30	IL18,IHH
GO: Biological Process	GO:0005979	regulation of glycogen biosynthetic process	0.001187	1	0.006458	0.05455	2	30	INSR,AKT1
GO: Biological Process	GO:0010962	regulation of glucan biosynthetic process	0.001187	1	0.006458	0.05455	2	30	INSR,AKT1
GO: Biological Process	GO:0010922	positive regulation of phosphatase activity	0.001187	1	0.006458	0.05455	2	30	BMP2,CALM1
GO: Biological Process	GO:0033032	regulation of myeloid cell apoptotic process	0.001187	1	0.006458	0.05455	2	30	IL18,CD44
GO: Biological Process	GO:0021700	developmental maturation	0.001218	1	0.006613	0.05586	4	278	BMP2,AKT1,IHH,VEGFA
GO: Biological Process	GO:1903507	negative regulation of nucleic acid-templated transcription	0.001253	1	0.006791	0.05736	8	1307	CITED2,BMP2,IGF1R,NACC1,ETV7,PTHLH,VDR,VEGFA
GO: Biological Process	GO:2000191	regulation of fatty acid transport	0.001268	1	0.006827	0.05767	2	31	AKT1,TNFRSF11A
GO: Biological Process	GO:0048596	embryonic camera-type eye morphogenesis	0.001268	1	0.006827	0.05767	2	31	CITED2,IHH
GO: Biological Process	GO:0046717	acid secretion	0.001268	1	0.006827	0.05767	3	126	TNFRSF11A,NOS2,BDNF
GO: Biological Process	GO:0009890	negative regulation of biosynthetic process	0.001281	1	0.006882	0.05813	9	1642	CITED2,BMP2,NPR3,IGF1R,NACC1,ETV7,PTHLH,VDR,VEGFA
GO: Biological Process	GO:0008286	insulin receptor signaling pathway	0.001297	1	0.006943	0.05865	3	127	IGF1R,INSR,AKT1
GO: Biological Process	GO:0051172	negative regulation of nitrogen compound metabolic process	0.001297	1	0.006943	0.05865	9	1645	CITED2,BMP2,NPR3,IGF1R,NACC1,ETV7,PTHLH,VDR,VEGFA
GO: Biological Process	GO:0043270	positive regulation of ion transport	0.001318	1	0.007037	0.05945	4	284	CALM1,KCNJ11,AKT1,TNFRSF11A
GO: Biological Process	GO:0006171	cAMP biosynthetic process	0.001327	1	0.007071	0.05973	3	128	NPR3,CALM1,PTHLH
GO: Biological Process	GO:1902679	negative regulation of RNA biosynthetic process	0.001349	1	0.007126	0.0602	8	1322	CITED2,BMP2,IGF1R,NACC1,ETV7,PTHLH,VDR,VEGFA
GO: Biological Process	GO:0030947	regulation of vascular endothelial growth factor receptor signaling pathway	0.001351	1	0.007126	0.0602	2	32	FGF18,VEGFA
GO: Biological Process	GO:0046640	regulation of alpha-beta T cell proliferation	0.001351	1	0.007126	0.0602	2	32	IL18,CD44
GO: Biological Process	GO:1903670	regulation of sprouting angiogenesis	0.001351	1	0.007126	0.0602	2	32	FGF18,VEGFA
GO: Biological Process	GO:0030224	monocyte differentiation	0.001351	1	0.007126	0.0602	2	32	GPR68,VEGFA
GO: Biological Process	GO:0006952	defense response	0.001354	1	0.007129	0.06022	9	1655	BMP2,IL18,GPR68,CD44,AKT1,TNFRSF11A,NOS2,BDNF,VCAM1
GO: Biological Process	GO:0048593	camera-type eye morphogenesis	0.001357	1	0.007129	0.06022	3	129	CITED2,IHH,VEGFA
GO: Biological Process	GO:0010976	positive regulation of neuron projection development	0.00137	1	0.007183	0.06068	4	287	IGF1R,GRN,BDNF,VEGFA
GO: Biological Process	GO:0010975	regulation of neuron projection development	0.00138	1	0.007222	0.06101	5	494	IGF1R,AKT1,GRN,BDNF,VEGFA
GO: Biological Process	GO:0007389	pattern specification process	0.001392	1	0.007273	0.06143	5	495	CITED2,BMP2,SOST,IHH,VEGFA
GO: Biological Process	GO:0090087	regulation of peptide transport	0.001423	1	0.007413	0.06262	4	290	IL18,GPR68,KCNJ11,NOS2
GO: Biological Process	GO:1902692	regulation of neuroblast proliferation	0.001436	1	0.007413	0.06262	2	33	BDNF,VEGFA
GO: Biological Process	GO:0034105	positive regulation of tissue remodeling	0.001436	1	0.007413	0.06262	2	33	IL18,VDR
GO: Biological Process	GO:0061418	regulation of transcription from RNA polymerase II promoter in response to hypoxia	0.001436	1	0.007413	0.06262	2	33	CITED2,VEGFA
GO: Biological Process	GO:0060740	prostate gland epithelium morphogenesis	0.001436	1	0.007413	0.06262	2	33	IGF1R,CD44
GO: Biological Process	GO:0030823	regulation of cGMP metabolic process	0.001436	1	0.007413	0.06262	2	33	NOS2,VEGFA
GO: Biological Process	GO:0051302	regulation of cell division	0.001441	1	0.007424	0.06271	4	291	IGF1R,CALM1,INSR,VEGFA
GO: Biological Process	GO:0080135	regulation of cellular response to stress	0.001509	1	0.007759	0.06554	6	753	BMP2,IGF1R,CD44,AKT1,TNFRSF11A,VEGFA
GO: Biological Process	GO:0038066	p38MAPK cascade	0.001524	1	0.007807	0.06595	2	34	BMP2,VEGFA
GO: Biological Process	GO:0045581	negative regulation of T cell differentiation	0.001524	1	0.007807	0.06595	2	34	CD44,IHH
GO: Biological Process	GO:0051896	regulation of protein kinase B signaling	0.001546	1	0.007901	0.06674	3	135	IGF1R,INSR,VEGFA
GO: Biological Process	GO:0090596	sensory organ morphogenesis	0.001553	1	0.007924	0.06693	4	297	CITED2,IHH,BDNF,VEGFA
GO: Biological Process	GO:0070489	T cell aggregation	0.001561	1	0.007933	0.06701	5	508	IL18,CD44,AKT1,IHH,VCAM1
GO: Biological Process	GO:0042110	T cell activation	0.001561	1	0.007933	0.06701	5	508	IL18,CD44,AKT1,IHH,VCAM1
GO: Biological Process	GO:0071593	lymphocyte aggregation	0.001575	1	0.007987	0.06746	5	509	IL18,CD44,AKT1,IHH,VCAM1
GO: Biological Process	GO:0046631	alpha-beta T cell activation	0.001612	1	0.008128	0.06866	3	137	IL18,CD44,IHH
GO: Biological Process	GO:0043114	regulation of vascular permeability	0.001615	1	0.008128	0.06866	2	35	IL18,VEGFA
GO: Biological Process	GO:0060512	prostate gland morphogenesis	0.001615	1	0.008128	0.06866	2	35	IGF1R,CD44
GO: Biological Process	GO:0033028	myeloid cell apoptotic process	0.001615	1	0.008128	0.06866	2	35	IL18,CD44
GO: Biological Process	GO:0002694	regulation of leukocyte activation	0.001644	1	0.008208	0.06934	5	514	IL18,CD44,AKT1,IHH,VCAM1
GO: Biological Process	GO:0046883	regulation of hormone secretion	0.001671	1	0.008208	0.06934	4	303	IL11,GPR68,KCNJ11,NOS2
GO: Biological Process	GO:0046651	lymphocyte proliferation	0.001671	1	0.008208	0.06934	4	303	IL18,CD44,IHH,VCAM1
GO: Biological Process	GO:0070486	leukocyte aggregation	0.001672	1	0.008208	0.06934	5	516	IL18,CD44,AKT1,IHH,VCAM1
GO: Biological Process	GO:0055082	cellular chemical homeostasis	0.00168	1	0.008208	0.06934	6	769	IGF1R,CALM1,GPR68,KCNJ11,VCAM1,VDR
GO: Biological Process	GO:0051253	negative regulation of RNA metabolic process	0.001697	1	0.008208	0.06934	8	1370	CITED2,BMP2,IGF1R,NACC1,ETV7,PTHLH,VDR,VEGFA
GO: Biological Process	GO:0071417	cellular response to organonitrogen compound	0.001701	1	0.008208	0.06934	5	518	IL18,IGF1R,KCNJ11,INSR,AKT1
GO: Biological Process	GO:1903570	regulation of protein kinase D signaling	0.001706	1	0.008208	0.06934	1	1	VEGFA
GO: Biological Process	GO:0060649	mammary gland bud elongation	0.001706	1	0.008208	0.06934	1	1	PTHLH
GO: Biological Process	GO:0048074	negative regulation of eye pigmentation	0.001706	1	0.008208	0.06934	1	1	IHH
GO: Biological Process	GO:1904244	positive regulation of pancreatic trypsinogen secretion	0.001706	1	0.008208	0.06934	1	1	MMP13
GO: Biological Process	GO:0100002	negative regulation of protein kinase activity by protein phosphorylation	0.001706	1	0.008208	0.06934	1	1	AKT1
GO: Biological Process	GO:0031550	positive regulation of brain-derived neurotrophic factor receptor signaling pathway	0.001706	1	0.008208	0.06934	1	1	BDNF
GO: Biological Process	GO:0060709	glycogen cell differentiation involved in embryonic placenta development	0.001706	1	0.008208	0.06934	1	1	AKT1
GO: Biological Process	GO:0051042	negative regulation of calcium-independent cell-cell adhesion	0.001706	1	0.008208	0.06934	1	1	BMP2
GO: Biological Process	GO:1990747	pancreatic trypsinogen secretion	0.001706	1	0.008208	0.06934	1	1	MMP13
GO: Biological Process	GO:0060659	nipple sheath formation	0.001706	1	0.008208	0.06934	1	1	PTHLH
GO: Biological Process	GO:1904242	regulation of pancreatic trypsinogen secretion	0.001706	1	0.008208	0.06934	1	1	MMP13
GO: Biological Process	GO:0051389	inactivation of MAPKK activity	0.001706	1	0.008208	0.06934	1	1	IGF1R
GO: Biological Process	GO:1903572	positive regulation of protein kinase D signaling	0.001706	1	0.008208	0.06934	1	1	VEGFA
GO: Biological Process	GO:0048086	negative regulation of developmental pigmentation	0.001706	1	0.008208	0.06934	1	1	IHH
GO: Biological Process	GO:0030704	vitelline membrane formation	0.001706	1	0.008208	0.06934	1	1	IHH
GO: Biological Process	GO:0002575	basophil chemotaxis	0.001706	1	0.008208	0.06934	1	1	VEGFA
GO: Biological Process	GO:0060804	positive regulation of Wnt signaling pathway by BMP signaling pathway	0.001706	1	0.008208	0.06934	1	1	BMP2
GO: Biological Process	GO:0051781	positive regulation of cell division	0.001715	1	0.008222	0.06945	3	140	IGF1R,INSR,VEGFA
GO: Biological Process	GO:0071346	cellular response to interferon-gamma	0.001715	1	0.008222	0.06945	3	140	CD44,NOS2,VCAM1
GO: Biological Process	GO:0032943	mononuclear cell proliferation	0.001733	1	0.008275	0.0699	4	306	IL18,CD44,IHH,VCAM1
GO: Biological Process	GO:0032880	regulation of protein localization	0.001733	1	0.008275	0.0699	7	1060	IL18,GPR68,KCNJ11,AKT1,MMP13,NOS2,VEGFA
GO: Biological Process	GO:0030814	regulation of cAMP metabolic process	0.001751	1	0.008345	0.07049	3	141	NPR3,CALM1,PTHLH
GO: Biological Process	GO:0002053	positive regulation of mesenchymal cell proliferation	0.001804	1	0.008568	0.07237	2	37	IHH,VEGFA
GO: Biological Process	GO:0070873	regulation of glycogen metabolic process	0.001804	1	0.008568	0.07237	2	37	INSR,AKT1
GO: Biological Process	GO:1901214	regulation of neuron death	0.001817	1	0.008613	0.07276	4	310	IL18,AKT1,BDNF,VEGFA
GO: Biological Process	GO:1903707	negative regulation of hemopoiesis	0.001823	1	0.008625	0.07286	3	143	GPR68,CD44,IHH
GO: Biological Process	GO:0051051	negative regulation of transport	0.001835	1	0.008667	0.07321	5	527	IL11,CALM1,KCNJ11,INSR,AKT1
GO: Biological Process	GO:0071456	cellular response to hypoxia	0.001859	1	0.008754	0.07395	3	144	CITED2,AKT1,VEGFA
GO: Biological Process	GO:0051251	positive regulation of lymphocyte activation	0.00186	1	0.008754	0.07395	4	312	IL18,AKT1,IHH,VCAM1
GO: Biological Process	GO:0050767	regulation of neurogenesis	0.001902	1	0.008905	0.07522	6	788	BMP2,IGF1R,AKT1,GRN,BDNF,VEGFA
GO: Biological Process	GO:0032885	regulation of polysaccharide biosynthetic process	0.001902	1	0.008905	0.07522	2	38	INSR,AKT1
GO: Biological Process	GO:0003197	endocardial cushion development	0.001902	1	0.008905	0.07522	2	38	CITED2,BMP2
GO: Biological Process	GO:0035051	cardiocyte differentiation	0.001934	1	0.009037	0.07634	3	146	CITED2,BMP2,VEGFA
GO: Biological Process	GO:0051962	positive regulation of nervous system development	0.001944	1	0.009068	0.0766	5	534	BMP2,IGF1R,GRN,BDNF,VEGFA
GO: Biological Process	GO:0030182	neuron differentiation	0.001993	1	0.009228	0.07795	8	1405	BMP2,IGF1R,CD44,AKT1,GRN,IHH,BDNF,VEGFA
GO: Biological Process	GO:0003156	regulation of animal organ formation	0.002003	1	0.009228	0.07795	2	39	CITED2,BMP2
GO: Biological Process	GO:0033280	response to vitamin D	0.002003	1	0.009228	0.07795	2	39	INSR,VDR
GO: Biological Process	GO:0042517	positive regulation of tyrosine phosphorylation of Stat3 protein	0.002003	1	0.009228	0.07795	2	39	IL18,VEGFA
GO: Biological Process	GO:0046633	alpha-beta T cell proliferation	0.002003	1	0.009228	0.07795	2	39	IL18,CD44
GO: Biological Process	GO:0032350	regulation of hormone metabolic process	0.002003	1	0.009228	0.07795	2	39	BMP2,IGF1R
GO: Biological Process	GO:0030212	hyaluronan metabolic process	0.002003	1	0.009228	0.07795	2	39	CD44,AKT1
GO: Biological Process	GO:0050878	regulation of body fluid levels	0.002025	1	0.009312	0.07866	5	539	NPR3,AKT1,MMP13,VDR,VEGFA
GO: Biological Process	GO:0051046	regulation of secretion	0.002079	1	0.009546	0.08064	6	802	IL11,GPR68,KCNJ11,TNFRSF11A,MMP13,NOS2
GO: Biological Process	GO:0009165	nucleotide biosynthetic process	0.002086	1	0.009556	0.08072	4	322	NPR3,CALM1,NOS2,PTHLH
GO: Biological Process	GO:0014066	regulation of phosphatidylinositol 3-kinase signaling	0.002089	1	0.009556	0.08072	3	150	IGF1R,AKT1,FGF18
GO: Biological Process	GO:0032309	icosanoid secretion	0.002106	1	0.009585	0.08097	2	40	TNFRSF11A,NOS2
GO: Biological Process	GO:0048048	embryonic eye morphogenesis	0.002106	1	0.009585	0.08097	2	40	CITED2,IHH
GO: Biological Process	GO:0032965	regulation of collagen biosynthetic process	0.002106	1	0.009585	0.08097	2	40	IL18,IHH
GO: Biological Process	GO:0036294	cellular response to decreased oxygen levels	0.002129	1	0.009671	0.08169	3	151	CITED2,AKT1,VEGFA
GO: Biological Process	GO:1901293	nucleoside phosphate biosynthetic process	0.002158	1	0.00977	0.08253	4	325	NPR3,CALM1,NOS2,PTHLH
GO: Biological Process	GO:0071375	cellular response to peptide hormone stimulus	0.002158	1	0.00977	0.08253	4	325	IL18,IGF1R,INSR,AKT1
GO: Biological Process	GO:0007159	leukocyte cell-cell adhesion	0.002211	1	0.009979	0.0843	5	550	IL18,CD44,AKT1,IHH,VCAM1
GO: Biological Process	GO:0060603	mammary gland duct morphogenesis	0.002212	1	0.009979	0.0843	2	41	PTHLH,VDR
GO: Biological Process	GO:0032874	positive regulation of stress-activated MAPK cascade	0.002251	1	0.01014	0.08565	3	154	BMP2,TNFRSF11A,VEGFA
GO: Biological Process	GO:0019216	regulation of lipid metabolic process	0.002281	1	0.01024	0.08653	4	330	BMP2,IGF1R,AKT1,VDR
GO: Biological Process	GO:0050865	regulation of cell activation	0.002282	1	0.01024	0.08653	5	554	IL18,CD44,AKT1,IHH,VCAM1
GO: Biological Process	GO:0070304	positive regulation of stress-activated protein kinase signaling cascade	0.002293	1	0.01027	0.08679	3	155	BMP2,TNFRSF11A,VEGFA
GO: Biological Process	GO:0010907	positive regulation of glucose metabolic process	0.00232	1	0.01036	0.08751	2	42	INSR,AKT1
GO: Biological Process	GO:0031076	embryonic camera-type eye development	0.00232	1	0.01036	0.08751	2	42	CITED2,IHH
GO: Biological Process	GO:0032269	negative regulation of cellular protein metabolic process	0.002326	1	0.01037	0.08759	7	1116	IL18,IGF1R,CALM1,INSR,CD44,AKT1,VEGFA
GO: Biological Process	GO:0046942	carboxylic acid transport	0.002357	1	0.01049	0.08861	4	333	AKT1,TNFRSF11A,NOS2,BDNF
GO: Biological Process	GO:0048666	neuron development	0.002373	1	0.01055	0.08908	7	1120	IGF1R,CD44,AKT1,GRN,IHH,BDNF,VEGFA
GO: Biological Process	GO:1903522	regulation of blood circulation	0.002383	1	0.01057	0.08927	4	334	CALM1,KCNJ11,AKT1,NOS2
GO: Biological Process	GO:0016049	cell growth	0.002429	1	0.01073	0.0906	5	562	CD44,AKT1,ADIPOR2,BDNF,VEGFA
GO: Biological Process	GO:0033574	response to testosterone	0.00243	1	0.01073	0.0906	2	43	KCNJ11,INSR
GO: Biological Process	GO:0031952	regulation of protein autophosphorylation	0.00243	1	0.01073	0.0906	2	43	CALM1,VEGFA
GO: Biological Process	GO:0044712	single-organism catabolic process	0.002459	1	0.01082	0.09142	7	1127	COL10A1,CALM1,INSR,CD44,AKT1,MMP13,NOS2
GO: Biological Process	GO:0015849	organic acid transport	0.002461	1	0.01082	0.09142	4	337	AKT1,TNFRSF11A,NOS2,BDNF
GO: Biological Process	GO:0071453	cellular response to oxygen levels	0.002465	1	0.01082	0.09142	3	159	CITED2,AKT1,VEGFA
GO: Biological Process	GO:2000113	negative regulation of cellular macromolecule biosynthetic process	0.002497	1	0.01094	0.09244	8	1456	CITED2,BMP2,IGF1R,NACC1,ETV7,PTHLH,VDR,VEGFA
GO: Biological Process	GO:0022603	regulation of anatomical structure morphogenesis	0.002509	1	0.01098	0.09274	7	1131	CITED2,BMP2,IL18,FGF18,BDNF,VDR,VEGFA
GO: Biological Process	GO:0045321	leukocyte activation	0.002517	1	0.01099	0.09287	6	833	IL11,IL18,CD44,AKT1,IHH,VCAM1
GO: Biological Process	GO:1901571	fatty acid derivative transport	0.002543	1	0.01107	0.09355	2	44	TNFRSF11A,NOS2
GO: Biological Process	GO:0071715	icosanoid transport	0.002543	1	0.01107	0.09355	2	44	TNFRSF11A,NOS2
GO: Biological Process	GO:1901653	cellular response to peptide	0.002568	1	0.01116	0.09431	4	341	IL18,IGF1R,INSR,AKT1
GO: Biological Process	GO:0046058	cAMP metabolic process	0.002599	1	0.01128	0.09528	3	162	NPR3,CALM1,PTHLH
GO: Biological Process	GO:0002696	positive regulation of leukocyte activation	0.002623	1	0.01133	0.09573	4	343	IL18,AKT1,IHH,VCAM1
GO: Biological Process	GO:0071396	cellular response to lipid	0.002642	1	0.01133	0.09573	5	573	IL18,AKT1,NOS2,BDNF,VDR
GO: Biological Process	GO:0034341	response to interferon-gamma	0.002645	1	0.01133	0.09573	3	163	CD44,NOS2,VCAM1
GO: Biological Process	GO:0045773	positive regulation of axon extension	0.002659	1	0.01133	0.09573	2	45	BDNF,VEGFA
GO: Biological Process	GO:0051445	regulation of meiotic cell cycle	0.002659	1	0.01133	0.09573	2	45	IGF1R,INSR
GO: Biological Process	GO:0007595	lactation	0.002659	1	0.01133	0.09573	2	45	VDR,VEGFA
GO: Biological Process	GO:1904036	negative regulation of epithelial cell apoptotic process	0.002659	1	0.01133	0.09573	2	45	IL11,IGF1R
GO: Biological Process	GO:0032881	regulation of polysaccharide metabolic process	0.002659	1	0.01133	0.09573	2	45	INSR,AKT1
GO: Biological Process	GO:0045620	negative regulation of lymphocyte differentiation	0.002659	1	0.01133	0.09573	2	45	CD44,IHH
GO: Biological Process	GO:0010464	regulation of mesenchymal cell proliferation	0.002659	1	0.01133	0.09573	2	45	IHH,VEGFA
GO: Biological Process	GO:0001569	branching involved in blood vessel morphogenesis	0.002659	1	0.01133	0.09573	2	45	IHH,VEGFA
GO: Biological Process	GO:0050727	regulation of inflammatory response	0.002679	1	0.0114	0.09628	4	345	IL18,CD44,TNFRSF11A,NOS2
GO: Biological Process	GO:0043542	endothelial cell migration	0.002691	1	0.01143	0.09656	3	164	AKT1,FGF18,VEGFA
GO: Biological Process	GO:0006935	chemotaxis	0.002702	1	0.01146	0.09681	5	576	TNFRSF11A,FGF18,BDNF,VCAM1,VEGFA
GO: Biological Process	GO:0055123	digestive system development	0.002737	1	0.01159	0.09792	3	165	IGF1R,INSR,IHH
GO: Biological Process	GO:0042330	taxis	0.002743	1	0.0116	0.09796	5	578	TNFRSF11A,FGF18,BDNF,VCAM1,VEGFA
GO: Biological Process	GO:2001259	positive regulation of cation channel activity	0.002777	1	0.01166	0.09853	2	46	CALM1,KCNJ11
GO: Biological Process	GO:0045843	negative regulation of striated muscle tissue development	0.002777	1	0.01166	0.09853	2	46	BMP2,BDNF
GO: Biological Process	GO:0032964	collagen biosynthetic process	0.002777	1	0.01166	0.09853	2	46	IL18,IHH
GO: Biological Process	GO:0010712	regulation of collagen metabolic process	0.002777	1	0.01166	0.09853	2	46	IL18,IHH
GO: Biological Process	GO:0070997	neuron death	0.002792	1	0.01171	0.09892	4	349	IL18,AKT1,BDNF,VEGFA
GO: Biological Process	GO:0014065	phosphatidylinositol 3-kinase signaling	0.002832	1	0.01184	0.1	3	167	IGF1R,AKT1,FGF18
GO: Biological Process	GO:0015758	glucose transport	0.002832	1	0.01184	0.1	3	167	INSR,AKT1,ADIPOR2
GO: Biological Process	GO:0044246	regulation of multicellular organismal metabolic process	0.002897	1	0.01209	0.1021	2	47	IL18,IHH
GO: Biological Process	GO:0015718	monocarboxylic acid transport	0.002929	1	0.01217	0.1028	3	169	AKT1,TNFRSF11A,NOS2
GO: Biological Process	GO:0008645	hexose transport	0.002929	1	0.01217	0.1028	3	169	INSR,AKT1,ADIPOR2
GO: Biological Process	GO:0061351	neural precursor cell proliferation	0.002929	1	0.01217	0.1028	3	169	GRN,BDNF,VEGFA
GO: Biological Process	GO:0045787	positive regulation of cell cycle	0.002969	1	0.01231	0.104	4	355	CITED2,IGF1R,INSR,AKT1
GO: Biological Process	GO:0071222	cellular response to lipopolysaccharide	0.002978	1	0.01231	0.104	3	170	IL18,AKT1,NOS2
GO: Biological Process	GO:0030307	positive regulation of cell growth	0.002978	1	0.01231	0.104	3	170	AKT1,BDNF,VEGFA
GO: Biological Process	GO:0044057	regulation of system process	0.002997	1	0.01234	0.1042	5	590	CALM1,KCNJ11,AKT1,MMP13,NOS2
GO: Biological Process	GO:0009617	response to bacterium	0.002997	1	0.01234	0.1042	5	590	IL18,AKT1,TNFRSF11A,NOS2,VCAM1
GO: Biological Process	GO:0050867	positive regulation of cell activation	0.002999	1	0.01234	0.1042	4	356	IL18,AKT1,IHH,VCAM1
GO: Biological Process	GO:0042088	T-helper 1 type immune response	0.00302	1	0.01235	0.1043	2	48	IL18,VEGFA
GO: Biological Process	GO:0048635	negative regulation of muscle organ development	0.00302	1	0.01235	0.1043	2	48	BMP2,BDNF
GO: Biological Process	GO:0010623	programmed cell death involved in cell development	0.00302	1	0.01235	0.1043	2	48	BDNF,VDR
GO: Biological Process	GO:0035307	positive regulation of protein dephosphorylation	0.00302	1	0.01235	0.1043	2	48	BMP2,CALM1
GO: Biological Process	GO:0015749	monosaccharide transport	0.003028	1	0.01236	0.1044	3	171	INSR,AKT1,ADIPOR2
GO: Biological Process	GO:0015833	peptide transport	0.00306	1	0.01245	0.1052	4	358	IL18,GPR68,KCNJ11,NOS2
GO: Biological Process	GO:0046879	hormone secretion	0.00306	1	0.01245	0.1052	4	358	IL11,GPR68,KCNJ11,NOS2
GO: Biological Process	GO:0006694	steroid biosynthetic process	0.003078	1	0.01251	0.1057	3	172	BMP2,IGF1R,VDR
GO: Biological Process	GO:0031667	response to nutrient levels	0.003086	1	0.01252	0.1058	5	594	INSR,AKT1,ADIPOR2,VCAM1,VDR
GO: Biological Process	GO:0030098	lymphocyte differentiation	0.003091	1	0.01252	0.1058	4	359	IL11,CD44,IHH,VCAM1
GO: Biological Process	GO:0035306	positive regulation of dephosphorylation	0.003145	1	0.01268	0.1071	2	49	BMP2,CALM1
GO: Biological Process	GO:1901862	negative regulation of muscle tissue development	0.003145	1	0.01268	0.1071	2	49	BMP2,BDNF
GO: Biological Process	GO:0042516	regulation of tyrosine phosphorylation of Stat3 protein	0.003145	1	0.01268	0.1071	2	49	IL18,VEGFA
GO: Biological Process	GO:0007423	sensory organ development	0.003153	1	0.0127	0.1072	5	597	CITED2,BMP2,IHH,BDNF,VEGFA
GO: Biological Process	GO:1901699	cellular response to nitrogen compound	0.003176	1	0.01277	0.1078	5	598	IL18,IGF1R,KCNJ11,INSR,AKT1
GO: Biological Process	GO:0010632	regulation of epithelial cell migration	0.003232	1	0.01297	0.1096	3	175	AKT1,FGF18,VEGFA
GO: Biological Process	GO:0042503	tyrosine phosphorylation of Stat3 protein	0.003273	1	0.01306	0.1103	2	50	IL18,VEGFA
GO: Biological Process	GO:0045840	positive regulation of mitotic nuclear division	0.003273	1	0.01306	0.1103	2	50	IGF1R,INSR
GO: Biological Process	GO:0045429	positive regulation of nitric oxide biosynthetic process	0.003273	1	0.01306	0.1103	2	50	INSR,AKT1
GO: Biological Process	GO:1904407	positive regulation of nitric oxide metabolic process	0.003273	1	0.01306	0.1103	2	50	INSR,AKT1
GO: Biological Process	GO:0007586	digestion	0.003284	1	0.01308	0.1105	3	176	NPR3,MMP13,VDR
GO: Biological Process	GO:0071219	cellular response to molecule of bacterial origin	0.003337	1	0.0131	0.1107	3	177	IL18,AKT1,NOS2
GO: Biological Process	GO:0048585	negative regulation of response to stimulus	0.003347	1	0.0131	0.1107	8	1526	BMP2,SOST,IGF1R,CALM1,CD44,AKT1,IHH,VEGFA
GO: Biological Process	GO:0031346	positive regulation of cell projection organization	0.003378	1	0.0131	0.1107	4	368	IGF1R,GRN,BDNF,VEGFA
GO: Biological Process	GO:2000377	regulation of reactive oxygen species metabolic process	0.00339	1	0.0131	0.1107	3	178	IL18,INSR,AKT1
GO: Biological Process	GO:0046068	cGMP metabolic process	0.003403	1	0.0131	0.1107	2	51	NOS2,VEGFA
GO: Biological Process	GO:0003169	coronary vein morphogenesis	0.003404	1	0.0131	0.1107	1	2	VEGFA
GO: Biological Process	GO:2000256	positive regulation of male germ cell proliferation	0.003404	1	0.0131	0.1107	1	2	IL18
GO: Biological Process	GO:0035802	adrenal cortex formation	0.003404	1	0.0131	0.1107	1	2	CITED2
GO: Biological Process	GO:0038190	VEGF-activated neuropilin signaling pathway	0.003404	1	0.0131	0.1107	1	2	VEGFA
GO: Biological Process	GO:1903944	negative regulation of hepatocyte apoptotic process	0.003404	1	0.0131	0.1107	1	2	IGF1R
GO: Biological Process	GO:0061193	taste bud development	0.003404	1	0.0131	0.1107	1	2	BDNF
GO: Biological Process	GO:0060658	nipple morphogenesis	0.003404	1	0.0131	0.1107	1	2	PTHLH
GO: Biological Process	GO:0060086	circadian temperature homeostasis	0.003404	1	0.0131	0.1107	1	2	TNFRSF11A
GO: Biological Process	GO:1903943	regulation of hepatocyte apoptotic process	0.003404	1	0.0131	0.1107	1	2	IGF1R
GO: Biological Process	GO:1902336	positive regulation of retinal ganglion cell axon guidance	0.003404	1	0.0131	0.1107	1	2	VEGFA
GO: Biological Process	GO:0071810	regulation of fever generation by regulation of prostaglandin secretion	0.003404	1	0.0131	0.1107	1	2	TNFRSF11A
GO: Biological Process	GO:0060220	camera-type eye photoreceptor cell fate commitment	0.003404	1	0.0131	0.1107	1	2	IHH
GO: Biological Process	GO:0035801	adrenal cortex development	0.003404	1	0.0131	0.1107	1	2	CITED2
GO: Biological Process	GO:0051040	regulation of calcium-independent cell-cell adhesion	0.003404	1	0.0131	0.1107	1	2	BMP2
GO: Biological Process	GO:0038189	neuropilin signaling pathway	0.003404	1	0.0131	0.1107	1	2	VEGFA
GO: Biological Process	GO:0071812	positive regulation of fever generation by positive regulation of prostaglandin secretion	0.003404	1	0.0131	0.1107	1	2	TNFRSF11A
GO: Biological Process	GO:0071848	positive regulation of ERK1 and ERK2 cascade via TNFSF11-mediated signaling	0.003404	1	0.0131	0.1107	1	2	TNFRSF11A
GO: Biological Process	GO:0100009	regulation of fever generation by prostaglandin secretion	0.003404	1	0.0131	0.1107	1	2	TNFRSF11A
GO: Biological Process	GO:0051960	regulation of nervous system development	0.003422	1	0.01315	0.1111	6	886	BMP2,IGF1R,AKT1,GRN,BDNF,VEGFA
GO: Biological Process	GO:0007155	cell adhesion	0.003471	1	0.01332	0.1125	8	1535	CITED2,BMP2,IL18,CD44,AKT1,IHH,VCAM1,VEGFA
GO: Biological Process	GO:0009914	hormone transport	0.003477	1	0.01332	0.1125	4	371	IL11,GPR68,KCNJ11,NOS2
GO: Biological Process	GO:0048699	generation of neurons	0.003514	1	0.01344	0.1136	8	1538	BMP2,IGF1R,CD44,AKT1,GRN,IHH,BDNF,VEGFA
GO: Biological Process	GO:1903706	regulation of hemopoiesis	0.003545	1	0.01354	0.1144	4	373	GPR68,CD44,IHH,VEGFA
GO: Biological Process	GO:0090407	organophosphate biosynthetic process	0.003557	1	0.01357	0.1146	5	614	NPR3,CALM1,NOS2,PTHLH,FGF18
GO: Biological Process	GO:0010558	negative regulation of macromolecule biosynthetic process	0.003614	1	0.01376	0.1162	8	1545	CITED2,BMP2,IGF1R,NACC1,ETV7,PTHLH,VDR,VEGFA
GO: Biological Process	GO:0070201	regulation of establishment of protein localization	0.003617	1	0.01376	0.1162	6	896	IL18,GPR68,KCNJ11,AKT1,MMP13,NOS2
GO: Biological Process	GO:0022610	biological adhesion	0.003643	1	0.01384	0.1169	8	1547	CITED2,BMP2,IL18,CD44,AKT1,IHH,VCAM1,VEGFA
GO: Biological Process	GO:0010770	positive regulation of cell morphogenesis involved in differentiation	0.003665	1	0.01386	0.1171	3	183	BMP2,BDNF,VEGFA
GO: Biological Process	GO:0046328	regulation of JNK cascade	0.003665	1	0.01386	0.1171	3	183	IGF1R,AKT1,TNFRSF11A
GO: Biological Process	GO:0048639	positive regulation of developmental growth	0.003665	1	0.01386	0.1171	3	183	INSR,BDNF,VEGFA
GO: Biological Process	GO:2000738	positive regulation of stem cell differentiation	0.003807	1	0.01425	0.1204	2	54	BMP2,SP7
GO: Biological Process	GO:1902930	regulation of alcohol biosynthetic process	0.003807	1	0.01425	0.1204	2	54	BMP2,VDR
GO: Biological Process	GO:0043535	regulation of blood vessel endothelial cell migration	0.003807	1	0.01425	0.1204	2	54	AKT1,VEGFA
GO: Biological Process	GO:0060711	labyrinthine layer development	0.003807	1	0.01425	0.1204	2	54	AKT1,VCAM1
GO: Biological Process	GO:0009250	glucan biosynthetic process	0.003807	1	0.01425	0.1204	2	54	INSR,AKT1
GO: Biological Process	GO:0035094	response to nicotine	0.003807	1	0.01425	0.1204	2	54	KCNJ11,VCAM1
GO: Biological Process	GO:0005978	glycogen biosynthetic process	0.003807	1	0.01425	0.1204	2	54	INSR,AKT1
GO: Biological Process	GO:0048871	multicellular organismal homeostasis	0.003823	1	0.01429	0.1207	4	381	TNFRSF11A,IHH,PTHLH,VEGFA
GO: Biological Process	GO:0009991	response to extracellular stimulus	0.003863	1	0.01442	0.1218	5	626	INSR,AKT1,ADIPOR2,VCAM1,VDR
GO: Biological Process	GO:0001754	eye photoreceptor cell differentiation	0.003946	1	0.01471	0.1243	2	55	IHH,VEGFA
GO: Biological Process	GO:0042886	amide transport	0.003968	1	0.01477	0.1248	4	385	IL18,GPR68,KCNJ11,NOS2
GO: Biological Process	GO:1903036	positive regulation of response to wounding	0.004011	1	0.01491	0.126	3	189	IL18,IGF1R,TNFRSF11A
GO: Biological Process	GO:0050900	leukocyte migration	0.004042	1	0.015	0.1267	4	387	CD44,TNFRSF11A,VCAM1,VEGFA
GO: Biological Process	GO:0031663	lipopolysaccharide-mediated signaling pathway	0.004088	1	0.01513	0.1278	2	56	IL18,AKT1
GO: Biological Process	GO:0045600	positive regulation of fat cell differentiation	0.004088	1	0.01513	0.1278	2	56	BMP2,AKT1
GO: Biological Process	GO:0006955	immune response	0.0041	1	0.01515	0.128	8	1577	IL18,IGF1R,CALM1,CD44,TNFRSF11A,NOS2,VCAM1,VEGFA
GO: Biological Process	GO:0080134	regulation of response to stress	0.004229	1	0.01561	0.1319	8	1585	BMP2,IL18,IGF1R,CD44,AKT1,TNFRSF11A,NOS2,VEGFA
GO: Biological Process	GO:0001654	eye development	0.004269	1	0.01574	0.1329	4	393	CITED2,IHH,BDNF,VEGFA
GO: Biological Process	GO:0001974	blood vessel remodeling	0.004379	1	0.01609	0.1359	2	58	IL18,VEGFA
GO: Biological Process	GO:0030850	prostate gland development	0.004379	1	0.01609	0.1359	2	58	IGF1R,CD44
GO: Biological Process	GO:0050796	regulation of insulin secretion	0.004504	1	0.01653	0.1396	3	197	GPR68,KCNJ11,NOS2
GO: Biological Process	GO:2000107	negative regulation of leukocyte apoptotic process	0.004528	1	0.01655	0.1398	2	59	IL18,CD44
GO: Biological Process	GO:0048286	lung alveolus development	0.004528	1	0.01655	0.1398	2	59	PTHLH,VEGFA
GO: Biological Process	GO:1903428	positive regulation of reactive oxygen species biosynthetic process	0.004528	1	0.01655	0.1398	2	59	INSR,AKT1
GO: Biological Process	GO:0071216	cellular response to biotic stimulus	0.004568	1	0.01667	0.1408	3	198	IL18,AKT1,NOS2
GO: Biological Process	GO:0014706	striated muscle tissue development	0.004585	1	0.01671	0.1412	4	401	CITED2,BMP2,BDNF,VEGFA
GO: Biological Process	GO:0043065	positive regulation of apoptotic process	0.004622	1	0.01682	0.1421	5	653	BMP2,IL18,CD44,AKT1,VDR
GO: Biological Process	GO:0008361	regulation of cell size	0.004633	1	0.01684	0.1422	3	199	AKT1,BDNF,VEGFA
GO: Biological Process	GO:0048844	artery morphogenesis	0.004679	1	0.01698	0.1435	2	60	CITED2,VEGFA
GO: Biological Process	GO:0051130	positive regulation of cellular component organization	0.004706	1	0.01706	0.1441	7	1266	BMP2,IGF1R,INSR,AKT1,GRN,BDNF,VEGFA
GO: Biological Process	GO:0002250	adaptive immune response	0.00479	1	0.01734	0.1465	4	406	IL18,CD44,TNFRSF11A,VEGFA
GO: Biological Process	GO:0043068	positive regulation of programmed cell death	0.004804	1	0.01734	0.1465	5	659	BMP2,IL18,CD44,AKT1,VDR
GO: Biological Process	GO:0031344	regulation of cell projection organization	0.004804	1	0.01734	0.1465	5	659	IGF1R,AKT1,GRN,BDNF,VEGFA
GO: Biological Process	GO:0035272	exocrine system development	0.004832	1	0.01735	0.1465	2	61	IGF1R,INSR
GO: Biological Process	GO:0060443	mammary gland morphogenesis	0.004832	1	0.01735	0.1465	2	61	PTHLH,VDR
GO: Biological Process	GO:0006801	superoxide metabolic process	0.004832	1	0.01735	0.1465	2	61	IL18,NOS2
GO: Biological Process	GO:0051148	negative regulation of muscle cell differentiation	0.004832	1	0.01735	0.1465	2	61	BMP2,IL18
GO: Biological Process	GO:0051054	positive regulation of DNA metabolic process	0.004897	1	0.01739	0.1469	3	203	IGF1R,INSR,AKT1
GO: Biological Process	GO:0031175	neuron projection development	0.004969	1	0.01739	0.1469	6	956	IGF1R,CD44,AKT1,GRN,BDNF,VEGFA
GO: Biological Process	GO:0007405	neuroblast proliferation	0.004988	1	0.01739	0.1469	2	62	BDNF,VEGFA
GO: Biological Process	GO:0051349	positive regulation of lyase activity	0.004988	1	0.01739	0.1469	2	62	CALM1,NOS2
GO: Biological Process	GO:0031281	positive regulation of cyclase activity	0.004988	1	0.01739	0.1469	2	62	CALM1,NOS2
GO: Biological Process	GO:0071695	anatomical structure maturation	0.004988	1	0.01739	0.1469	2	62	BMP2,AKT1
GO: Biological Process	GO:0008610	lipid biosynthetic process	0.005086	1	0.01739	0.1469	5	668	BMP2,IGF1R,AKT1,FGF18,VDR
GO: Biological Process	GO:1901215	negative regulation of neuron death	0.0051	1	0.01739	0.1469	3	206	AKT1,BDNF,VEGFA
GO: Biological Process	GO:0007160	cell-matrix adhesion	0.0051	1	0.01739	0.1469	3	206	CD44,VCAM1,VEGFA
GO: Biological Process	GO:0042231	interleukin-13 biosynthetic process	0.005102	1	0.01739	0.1469	1	3	IL18
GO: Biological Process	GO:0042706	eye photoreceptor cell fate commitment	0.005102	1	0.01739	0.1469	1	3	IHH
GO: Biological Process	GO:0003134	endodermal-mesodermal cell signaling involved in heart induction	0.005102	1	0.01739	0.1469	1	3	BMP2
GO: Biological Process	GO:1904193	negative regulation of cholangiocyte apoptotic process	0.005102	1	0.01739	0.1469	1	3	IGF1R
GO: Biological Process	GO:1900623	regulation of monocyte aggregation	0.005102	1	0.01739	0.1469	1	3	CD44
GO: Biological Process	GO:0035054	embryonic heart tube anterior/posterior pattern specification	0.005102	1	0.01739	0.1469	1	3	BMP2
GO: Biological Process	GO:1990418	response to insulin-like growth factor stimulus	0.005102	1	0.01739	0.1469	1	3	AKT1
GO: Biological Process	GO:1902488	cholangiocyte apoptotic process	0.005102	1	0.01739	0.1469	1	3	IGF1R
GO: Biological Process	GO:0010979	regulation of vitamin D 24-hydroxylase activity	0.005102	1	0.01739	0.1469	1	3	VDR
GO: Biological Process	GO:2000054	negative regulation of Wnt signaling pathway involved in dorsal/ventral axis specification	0.005102	1	0.01739	0.1469	1	3	SOST
GO: Biological Process	GO:1901492	positive regulation of lymphangiogenesis	0.005102	1	0.01739	0.1469	1	3	VEGFA
GO: Biological Process	GO:0038091	positive regulation of cell proliferation by VEGF-activated platelet derived growth factor receptor signaling pathway	0.005102	1	0.01739	0.1469	1	3	VEGFA
GO: Biological Process	GO:0060128	corticotropin hormone secreting cell differentiation	0.005102	1	0.01739	0.1469	1	3	BMP2
GO: Biological Process	GO:0031548	regulation of brain-derived neurotrophic factor receptor signaling pathway	0.005102	1	0.01739	0.1469	1	3	BDNF
GO: Biological Process	GO:0033031	positive regulation of neutrophil apoptotic process	0.005102	1	0.01739	0.1469	1	3	CD44
GO: Biological Process	GO:0010980	positive regulation of vitamin D 24-hydroxylase activity	0.005102	1	0.01739	0.1469	1	3	VDR
GO: Biological Process	GO:0048073	regulation of eye pigmentation	0.005102	1	0.01739	0.1469	1	3	IHH
GO: Biological Process	GO:0038086	VEGF-activated platelet-derived growth factor receptor signaling pathway	0.005102	1	0.01739	0.1469	1	3	VEGFA
GO: Biological Process	GO:0003133	endodermal-mesodermal cell signaling	0.005102	1	0.01739	0.1469	1	3	BMP2
GO: Biological Process	GO:1904192	regulation of cholangiocyte apoptotic process	0.005102	1	0.01739	0.1469	1	3	IGF1R
GO: Biological Process	GO:0032079	positive regulation of endodeoxyribonuclease activity	0.005102	1	0.01739	0.1469	1	3	AKT1
GO: Biological Process	GO:0016539	intein-mediated protein splicing	0.005102	1	0.01739	0.1469	1	3	IHH
GO: Biological Process	GO:1900625	positive regulation of monocyte aggregation	0.005102	1	0.01739	0.1469	1	3	CD44
GO: Biological Process	GO:0072138	mesenchymal cell proliferation involved in ureteric bud development	0.005102	1	0.01739	0.1469	1	3	BMP2
GO: Biological Process	GO:0038183	bile acid signaling pathway	0.005102	1	0.01739	0.1469	1	3	VDR
GO: Biological Process	GO:0035803	egg coat formation	0.005102	1	0.01739	0.1469	1	3	IHH
GO: Biological Process	GO:0046552	photoreceptor cell fate commitment	0.005102	1	0.01739	0.1469	1	3	IHH
GO: Biological Process	GO:0089700	protein kinase D signaling	0.005102	1	0.01739	0.1469	1	3	VEGFA
GO: Biological Process	GO:0003130	BMP signaling pathway involved in heart induction	0.005102	1	0.01739	0.1469	1	3	BMP2
GO: Biological Process	GO:0030908	protein splicing	0.005102	1	0.01739	0.1469	1	3	IHH
GO: Biological Process	GO:0043269	regulation of ion transport	0.005118	1	0.01742	0.1471	5	669	CALM1,KCNJ11,AKT1,TNFRSF11A,VDR
GO: Biological Process	GO:0042531	positive regulation of tyrosine phosphorylation of STAT protein	0.005146	1	0.01748	0.1477	2	63	IL18,VEGFA
GO: Biological Process	GO:0031400	negative regulation of protein modification process	0.005151	1	0.01748	0.1477	5	670	IL18,IGF1R,CALM1,INSR,AKT1
GO: Biological Process	GO:0022008	neurogenesis	0.005168	1	0.01752	0.148	8	1638	BMP2,IGF1R,CD44,AKT1,GRN,IHH,BDNF,VEGFA
GO: Biological Process	GO:0042692	muscle cell differentiation	0.005176	1	0.01752	0.148	4	415	BMP2,IL18,AKT1,VEGFA
GO: Biological Process	GO:0045428	regulation of nitric oxide biosynthetic process	0.005306	1	0.01788	0.1511	2	64	INSR,AKT1
GO: Biological Process	GO:0046635	positive regulation of alpha-beta T cell activation	0.005306	1	0.01788	0.1511	2	64	IL18,IHH
GO: Biological Process	GO:0043618	regulation of transcription from RNA polymerase II promoter in response to stress	0.005306	1	0.01788	0.1511	2	64	CITED2,VEGFA
GO: Biological Process	GO:0032869	cellular response to insulin stimulus	0.005309	1	0.01788	0.1511	3	209	IGF1R,INSR,AKT1
GO: Biological Process	GO:0008643	carbohydrate transport	0.00538	1	0.0181	0.1529	3	210	INSR,AKT1,ADIPOR2
GO: Biological Process	GO:0002683	negative regulation of immune system process	0.005581	1	0.01875	0.1584	4	424	IL18,GPR68,CD44,IHH
GO: Biological Process	GO:0042130	negative regulation of T cell proliferation	0.005634	1	0.01888	0.1595	2	66	CD44,IHH
GO: Biological Process	GO:0051785	positive regulation of nuclear division	0.005634	1	0.01888	0.1595	2	66	IGF1R,INSR
GO: Biological Process	GO:0030574	collagen catabolic process	0.005801	1	0.01934	0.1634	2	67	COL10A1,MMP13
GO: Biological Process	GO:0061515	myeloid cell development	0.005801	1	0.01934	0.1634	2	67	CITED2,GPR68
GO: Biological Process	GO:0032465	regulation of cytokinesis	0.005801	1	0.01934	0.1634	2	67	IGF1R,CALM1
GO: Biological Process	GO:1903779	regulation of cardiac conduction	0.005801	1	0.01934	0.1634	2	67	CALM1,KCNJ11
GO: Biological Process	GO:0007254	JNK cascade	0.005816	1	0.01937	0.1636	3	216	IGF1R,AKT1,TNFRSF11A
GO: Biological Process	GO:0032637	interleukin-8 production	0.005971	1	0.01973	0.1667	2	68	IL18,NOS2
GO: Biological Process	GO:0001947	heart looping	0.005971	1	0.01973	0.1667	2	68	CITED2,IHH
GO: Biological Process	GO:0045669	positive regulation of osteoblast differentiation	0.005971	1	0.01973	0.1667	2	68	BMP2,VEGFA
GO: Biological Process	GO:0045453	bone resorption	0.005971	1	0.01973	0.1667	2	68	IHH,VEGFA
GO: Biological Process	GO:0032890	regulation of organic acid transport	0.005971	1	0.01973	0.1667	2	68	AKT1,TNFRSF11A
GO: Biological Process	GO:0032410	negative regulation of transporter activity	0.005971	1	0.01973	0.1667	2	68	CALM1,INSR
GO: Biological Process	GO:0003151	outflow tract morphogenesis	0.006142	1	0.02022	0.1708	2	69	CITED2,VEGFA
GO: Biological Process	GO:0033692	cellular polysaccharide biosynthetic process	0.006142	1	0.02022	0.1708	2	69	INSR,AKT1
GO: Biological Process	GO:0048645	animal organ formation	0.006142	1	0.02022	0.1708	2	69	CITED2,BMP2
GO: Biological Process	GO:0010942	positive regulation of cell death	0.006152	1	0.02022	0.1708	5	699	BMP2,IL18,CD44,AKT1,VDR
GO: Biological Process	GO:0043281	regulation of cysteine-type endopeptidase activity involved in apoptotic process	0.006196	1	0.02032	0.1716	3	221	CD44,AKT1,VEGFA
GO: Biological Process	GO:0032409	regulation of transporter activity	0.006196	1	0.02032	0.1716	3	221	CALM1,KCNJ11,INSR
GO: Biological Process	GO:0043620	regulation of DNA-templated transcription in response to stress	0.006316	1	0.02069	0.1748	2	70	CITED2,VEGFA
GO: Biological Process	GO:0090092	regulation of transmembrane receptor protein serine/threonine kinase signaling pathway	0.006352	1	0.02078	0.1755	3	223	CITED2,BMP2,SOST
GO: Biological Process	GO:0001775	cell activation	0.006387	1	0.02087	0.1763	6	1007	IL11,IL18,CD44,AKT1,IHH,VCAM1
GO: Biological Process	GO:0043434	response to peptide hormone	0.006506	1	0.02123	0.1793	4	443	IL18,IGF1R,INSR,AKT1
GO: Biological Process	GO:0051726	regulation of cell cycle	0.00654	1	0.02131	0.18	6	1012	CITED2,BMP2,IGF1R,CALM1,INSR,AKT1
GO: Biological Process	GO:0050708	regulation of protein secretion	0.006609	1	0.02138	0.1806	4	445	GPR68,KCNJ11,MMP13,NOS2
GO: Biological Process	GO:0046530	photoreceptor cell differentiation	0.006671	1	0.02138	0.1806	2	72	IHH,VEGFA
GO: Biological Process	GO:0061371	determination of heart left/right asymmetry	0.006671	1	0.02138	0.1806	2	72	CITED2,IHH
GO: Biological Process	GO:2000504	positive regulation of blood vessel remodeling	0.006797	1	0.02138	0.1806	1	4	IL18
GO: Biological Process	GO:2000546	positive regulation of endothelial cell chemotaxis to fibroblast growth factor	0.006797	1	0.02138	0.1806	1	4	FGF18
GO: Biological Process	GO:0061428	negative regulation of transcription from RNA polymerase II promoter in response to hypoxia	0.006797	1	0.02138	0.1806	1	4	CITED2
GO: Biological Process	GO:0010748	negative regulation of plasma membrane long-chain fatty acid transport	0.006797	1	0.02138	0.1806	1	4	AKT1
GO: Biological Process	GO:0090187	positive regulation of pancreatic juice secretion	0.006797	1	0.02138	0.1806	1	4	MMP13
GO: Biological Process	GO:0060648	mammary gland bud morphogenesis	0.006797	1	0.02138	0.1806	1	4	PTHLH
GO: Biological Process	GO:0007412	axon target recognition	0.006797	1	0.02138	0.1806	1	4	BDNF
GO: Biological Process	GO:2000065	negative regulation of cortisol biosynthetic process	0.006797	1	0.02138	0.1806	1	4	BMP2
GO: Biological Process	GO:0071684	organism emergence from protective structure	0.006797	1	0.02138	0.1806	1	4	GRN
GO: Biological Process	GO:0033030	negative regulation of neutrophil apoptotic process	0.006797	1	0.02138	0.1806	1	4	IL18
GO: Biological Process	GO:0045590	negative regulation of regulatory T cell differentiation	0.006797	1	0.02138	0.1806	1	4	CD44
GO: Biological Process	GO:0060618	nipple development	0.006797	1	0.02138	0.1806	1	4	PTHLH
GO: Biological Process	GO:0051142	positive regulation of NK T cell proliferation	0.006797	1	0.02138	0.1806	1	4	IL18
GO: Biological Process	GO:2000053	regulation of Wnt signaling pathway involved in dorsal/ventral axis specification	0.006797	1	0.02138	0.1806	1	4	SOST
GO: Biological Process	GO:0090259	regulation of retinal ganglion cell axon guidance	0.006797	1	0.02138	0.1806	1	4	VEGFA
GO: Biological Process	GO:2001206	positive regulation of osteoclast development	0.006797	1	0.02138	0.1806	1	4	GPR68
GO: Biological Process	GO:0035188	hatching	0.006797	1	0.02138	0.1806	1	4	GRN
GO: Biological Process	GO:0032077	positive regulation of deoxyribonuclease activity	0.006797	1	0.02138	0.1806	1	4	AKT1
GO: Biological Process	GO:0071847	TNFSF11-mediated signaling pathway	0.006797	1	0.02138	0.1806	1	4	TNFRSF11A
GO: Biological Process	GO:1904849	positive regulation of cell chemotaxis to fibroblast growth factor	0.006797	1	0.02138	0.1806	1	4	FGF18
GO: Biological Process	GO:0060129	thyroid-stimulating hormone-secreting cell differentiation	0.006797	1	0.02138	0.1806	1	4	BMP2
GO: Biological Process	GO:0061209	cell proliferation involved in mesonephros development	0.006797	1	0.02138	0.1806	1	4	BMP2
GO: Biological Process	GO:0001835	blastocyst hatching	0.006797	1	0.02138	0.1806	1	4	GRN
GO: Biological Process	GO:0032345	negative regulation of aldosterone metabolic process	0.006797	1	0.02138	0.1806	1	4	BMP2
GO: Biological Process	GO:0032348	negative regulation of aldosterone biosynthetic process	0.006797	1	0.02138	0.1806	1	4	BMP2
GO: Biological Process	GO:0051140	regulation of NK T cell proliferation	0.006797	1	0.02138	0.1806	1	4	IL18
GO: Biological Process	GO:0006006	glucose metabolic process	0.006834	1	0.02147	0.1814	3	229	KCNJ11,INSR,AKT1
GO: Biological Process	GO:0010676	positive regulation of cellular carbohydrate metabolic process	0.006852	1	0.0215	0.1816	2	73	INSR,AKT1
GO: Biological Process	GO:2001234	negative regulation of apoptotic signaling pathway	0.006916	1	0.02165	0.1829	3	230	CD44,AKT1,VEGFA
GO: Biological Process	GO:0009755	hormone-mediated signaling pathway	0.006916	1	0.02165	0.1829	3	230	ADIPOR2,BDNF,VDR
GO: Biological Process	GO:0030073	insulin secretion	0.006999	1	0.02188	0.1849	3	231	GPR68,KCNJ11,NOS2
GO: Biological Process	GO:0002040	sprouting angiogenesis	0.007035	1	0.02192	0.1851	2	74	FGF18,VEGFA
GO: Biological Process	GO:1904035	regulation of epithelial cell apoptotic process	0.007035	1	0.02192	0.1851	2	74	IL11,IGF1R
GO: Biological Process	GO:0044243	multicellular organismal catabolic process	0.007035	1	0.02192	0.1851	2	74	COL10A1,MMP13
GO: Biological Process	GO:0003143	embryonic heart tube morphogenesis	0.00722	1	0.02244	0.1895	2	75	CITED2,IHH
GO: Biological Process	GO:0045761	regulation of adenylate cyclase activity	0.00722	1	0.02244	0.1895	2	75	NPR3,CALM1
GO: Biological Process	GO:2000116	regulation of cysteine-type endopeptidase activity	0.007252	1	0.02251	0.1902	3	234	CD44,AKT1,VEGFA
GO: Biological Process	GO:0010631	epithelial cell migration	0.007337	1	0.02275	0.1922	3	235	AKT1,FGF18,VEGFA
GO: Biological Process	GO:0042446	hormone biosynthetic process	0.007407	1	0.02289	0.1933	2	76	BMP2,IGF1R
GO: Biological Process	GO:0021675	nerve development	0.007407	1	0.02289	0.1933	2	76	CITED2,BDNF
GO: Biological Process	GO:0030500	regulation of bone mineralization	0.007407	1	0.02289	0.1933	2	76	BMP2,MGP
GO: Biological Process	GO:0090276	regulation of peptide hormone secretion	0.007423	1	0.02291	0.1935	3	236	GPR68,KCNJ11,NOS2
GO: Biological Process	GO:0015711	organic anion transport	0.007529	1	0.02321	0.196	4	462	AKT1,TNFRSF11A,NOS2,BDNF
GO: Biological Process	GO:0042509	regulation of tyrosine phosphorylation of STAT protein	0.007596	1	0.02333	0.1971	2	77	IL18,VEGFA
GO: Biological Process	GO:0043523	regulation of neuron apoptotic process	0.007597	1	0.02333	0.1971	3	238	IL18,BDNF,VEGFA
GO: Biological Process	GO:0090132	epithelium migration	0.007597	1	0.02333	0.1971	3	238	AKT1,FGF18,VEGFA
GO: Biological Process	GO:0001894	tissue homeostasis	0.007773	1	0.02385	0.2014	3	240	IHH,PTHLH,VEGFA
GO: Biological Process	GO:0043534	blood vessel endothelial cell migration	0.007788	1	0.02387	0.2016	2	78	AKT1,VEGFA
GO: Biological Process	GO:0002791	regulation of peptide secretion	0.007862	1	0.02406	0.2033	3	241	GPR68,KCNJ11,NOS2
GO: Biological Process	GO:0060560	developmental growth involved in morphogenesis	0.007951	1	0.02426	0.2049	3	242	PTHLH,BDNF,VEGFA
GO: Biological Process	GO:0050672	negative regulation of lymphocyte proliferation	0.007982	1	0.02426	0.2049	2	79	CD44,IHH
GO: Biological Process	GO:0002260	lymphocyte homeostasis	0.007982	1	0.02426	0.2049	2	79	CD44,AKT1
GO: Biological Process	GO:2000648	positive regulation of stem cell proliferation	0.007982	1	0.02426	0.2049	2	79	IHH,VEGFA
GO: Biological Process	GO:0032945	negative regulation of mononuclear cell proliferation	0.007982	1	0.02426	0.2049	2	79	CD44,IHH
GO: Biological Process	GO:0000271	polysaccharide biosynthetic process	0.007982	1	0.02426	0.2049	2	79	INSR,AKT1
GO: Biological Process	GO:1903530	regulation of secretion by cell	0.008056	1	0.02446	0.2066	5	746	IL11,GPR68,KCNJ11,MMP13,NOS2
GO: Biological Process	GO:0090130	tissue migration	0.008132	1	0.0246	0.2078	3	244	AKT1,FGF18,VEGFA
GO: Biological Process	GO:0032414	positive regulation of ion transmembrane transporter activity	0.008178	1	0.0246	0.2078	2	80	CALM1,KCNJ11
GO: Biological Process	GO:0050772	positive regulation of axonogenesis	0.008178	1	0.0246	0.2078	2	80	BDNF,VEGFA
GO: Biological Process	GO:0007422	peripheral nervous system development	0.008178	1	0.0246	0.2078	2	80	CITED2,AKT1
GO: Biological Process	GO:0071356	cellular response to tumor necrosis factor	0.008223	1	0.0246	0.2078	3	245	KCNJ11,TNFRSF11A,VCAM1
GO: Biological Process	GO:0010951	negative regulation of endopeptidase activity	0.008223	1	0.0246	0.2078	3	245	CD44,AKT1,VEGFA
GO: Biological Process	GO:0031341	regulation of cell killing	0.008376	1	0.0246	0.2078	2	81	IL11,NOS2
GO: Biological Process	GO:0034637	cellular carbohydrate biosynthetic process	0.008376	1	0.0246	0.2078	2	81	INSR,AKT1
GO: Biological Process	GO:0007189	adenylate cyclase-activating G-protein coupled receptor signaling pathway	0.008376	1	0.0246	0.2078	2	81	NPR3,PTHLH
GO: Biological Process	GO:0007260	tyrosine phosphorylation of STAT protein	0.008376	1	0.0246	0.2078	2	81	IL18,VEGFA
GO: Biological Process	GO:0097191	extrinsic apoptotic signaling pathway	0.008408	1	0.0246	0.2078	3	247	IL18,AKT1,VEGFA
GO: Biological Process	GO:1901652	response to peptide	0.008468	1	0.0246	0.2078	4	478	IL18,IGF1R,INSR,AKT1
GO: Biological Process	GO:0022614	membrane to membrane docking	0.008489	1	0.0246	0.2078	1	5	VCAM1
GO: Biological Process	GO:0002905	regulation of mature B cell apoptotic process	0.008489	1	0.0246	0.2078	1	5	CD44
GO: Biological Process	GO:1900086	positive regulation of peptidyl-tyrosine autophosphorylation	0.008489	1	0.0246	0.2078	1	5	VEGFA
GO: Biological Process	GO:0060948	cardiac vascular smooth muscle cell development	0.008489	1	0.0246	0.2078	1	5	VEGFA
GO: Biological Process	GO:0060058	positive regulation of apoptotic process involved in mammary gland involution	0.008489	1	0.0246	0.2078	1	5	VDR
GO: Biological Process	GO:0002906	negative regulation of mature B cell apoptotic process	0.008489	1	0.0246	0.2078	1	5	CD44
GO: Biological Process	GO:1904747	positive regulation of apoptotic process involved in development	0.008489	1	0.0246	0.2078	1	5	VDR
GO: Biological Process	GO:0061419	positive regulation of transcription from RNA polymerase II promoter in response to hypoxia	0.008489	1	0.0246	0.2078	1	5	VEGFA
GO: Biological Process	GO:1902966	positive regulation of protein localization to early endosome	0.008489	1	0.0246	0.2078	1	5	VEGFA
GO: Biological Process	GO:0042253	granulocyte macrophage colony-stimulating factor biosynthetic process	0.008489	1	0.0246	0.2078	1	5	IL18
GO: Biological Process	GO:0033088	negative regulation of immature T cell proliferation in thymus	0.008489	1	0.0246	0.2078	1	5	IHH
GO: Biological Process	GO:0034238	macrophage fusion	0.008489	1	0.0246	0.2078	1	5	CD44
GO: Biological Process	GO:0060971	embryonic heart tube left/right pattern formation	0.008489	1	0.0246	0.2078	1	5	CITED2
GO: Biological Process	GO:0031947	negative regulation of glucocorticoid biosynthetic process	0.008489	1	0.0246	0.2078	1	5	BMP2
GO: Biological Process	GO:0060057	apoptotic process involved in mammary gland involution	0.008489	1	0.0246	0.2078	1	5	VDR
GO: Biological Process	GO:0051343	positive regulation of cyclic-nucleotide phosphodiesterase activity	0.008489	1	0.0246	0.2078	1	5	CALM1
GO: Biological Process	GO:2000562	negative regulation of CD4-positive, alpha-beta T cell proliferation	0.008489	1	0.0246	0.2078	1	5	CD44
GO: Biological Process	GO:1901727	positive regulation of histone deacetylase activity	0.008489	1	0.0246	0.2078	1	5	VEGFA
GO: Biological Process	GO:0031944	negative regulation of glucocorticoid metabolic process	0.008489	1	0.0246	0.2078	1	5	BMP2
GO: Biological Process	GO:2000064	regulation of cortisol biosynthetic process	0.008489	1	0.0246	0.2078	1	5	BMP2
GO: Biological Process	GO:0045168	cell-cell signaling involved in cell fate commitment	0.008489	1	0.0246	0.2078	1	5	BMP2
GO: Biological Process	GO:0003308	negative regulation of Wnt signaling pathway involved in heart development	0.008489	1	0.0246	0.2078	1	5	BMP2
GO: Biological Process	GO:1902339	positive regulation of apoptotic process involved in morphogenesis	0.008489	1	0.0246	0.2078	1	5	VDR
GO: Biological Process	GO:0002901	mature B cell apoptotic process	0.008489	1	0.0246	0.2078	1	5	CD44
GO: Biological Process	GO:0072656	maintenance of protein location in mitochondrion	0.008489	1	0.0246	0.2078	1	5	AKT1
GO: Biological Process	GO:1902965	regulation of protein localization to early endosome	0.008489	1	0.0246	0.2078	1	5	VEGFA
GO: Biological Process	GO:1903521	positive regulation of mammary gland involution	0.008489	1	0.0246	0.2078	1	5	VDR
GO: Biological Process	GO:0070487	monocyte aggregation	0.008489	1	0.0246	0.2078	1	5	CD44
GO: Biological Process	GO:1903519	regulation of mammary gland involution	0.008489	1	0.0246	0.2078	1	5	VDR
GO: Biological Process	GO:0044275	cellular carbohydrate catabolic process	0.008576	1	0.02483	0.2097	2	82	CALM1,INSR
GO: Biological Process	GO:0042493	response to drug	0.008653	1	0.02499	0.2111	4	481	KCNJ11,MMP13,NOS2,BDNF
GO: Biological Process	GO:0009314	response to radiation	0.008653	1	0.02499	0.2111	4	481	CALM1,AKT1,TNFRSF11A,VCAM1
GO: Biological Process	GO:1903426	regulation of reactive oxygen species biosynthetic process	0.008779	1	0.02533	0.214	2	83	INSR,AKT1
GO: Biological Process	GO:0045913	positive regulation of carbohydrate metabolic process	0.008984	1	0.02586	0.2185	2	84	INSR,AKT1
GO: Biological Process	GO:0070664	negative regulation of leukocyte proliferation	0.008984	1	0.02586	0.2185	2	84	CD44,IHH
GO: Biological Process	GO:0030258	lipid modification	0.009171	1	0.02634	0.2225	3	255	AKT1,FGF18,ADIPOR2
GO: Biological Process	GO:0046889	positive regulation of lipid biosynthetic process	0.00919	1	0.02634	0.2225	2	85	IGF1R,AKT1
GO: Biological Process	GO:0030819	positive regulation of cAMP biosynthetic process	0.00919	1	0.02634	0.2225	2	85	CALM1,PTHLH
GO: Biological Process	GO:0060333	interferon-gamma-mediated signaling pathway	0.00919	1	0.02634	0.2225	2	85	CD44,VCAM1
GO: Biological Process	GO:0010466	negative regulation of peptidase activity	0.009367	1	0.02682	0.2266	3	257	CD44,AKT1,VEGFA
GO: Biological Process	GO:1904894	positive regulation of STAT cascade	0.009399	1	0.02682	0.2266	2	86	IL18,VEGFA
GO: Biological Process	GO:0046427	positive regulation of JAK-STAT cascade	0.009399	1	0.02682	0.2266	2	86	IL18,VEGFA
GO: Biological Process	GO:0070167	regulation of biomineral tissue development	0.009399	1	0.02682	0.2266	2	86	BMP2,MGP
GO: Biological Process	GO:1902532	negative regulation of intracellular signal transduction	0.009482	1	0.02703	0.2283	4	494	IGF1R,CALM1,CD44,AKT1
GO: Biological Process	GO:0070227	lymphocyte apoptotic process	0.00961	1	0.02732	0.2308	2	87	CD44,AKT1
GO: Biological Process	GO:0018107	peptidyl-threonine phosphorylation	0.00961	1	0.02732	0.2308	2	87	CALM1,AKT1
GO: Biological Process	GO:0016055	Wnt signaling pathway	0.009615	1	0.02732	0.2308	4	496	BMP2,SOST,CALM1,CD44
GO: Biological Process	GO:1901137	carbohydrate derivative biosynthetic process	0.00977	1	0.02773	0.2342	5	782	NPR3,CALM1,INSR,NOS2,PTHLH
GO: Biological Process	GO:0023061	signal release	0.009815	1	0.02779	0.2348	4	499	IL11,GPR68,KCNJ11,NOS2
GO: Biological Process	GO:0046888	negative regulation of hormone secretion	0.009823	1	0.02779	0.2348	2	88	IL11,KCNJ11
GO: Biological Process	GO:0034766	negative regulation of ion transmembrane transport	0.009823	1	0.02779	0.2348	2	88	CALM1,AKT1
GO: Biological Process	GO:0051402	neuron apoptotic process	0.009973	1	0.02804	0.2369	3	263	IL18,BDNF,VEGFA
GO: Biological Process	GO:0001570	vasculogenesis	0.01004	1	0.02804	0.2369	2	89	CITED2,VEGFA
GO: Biological Process	GO:0060754	positive regulation of mast cell chemotaxis	0.01018	1	0.02804	0.2369	1	6	VEGFA
GO: Biological Process	GO:0060745	mammary gland branching involved in pregnancy	0.01018	1	0.02804	0.2369	1	6	VDR
GO: Biological Process	GO:0001957	intramembranous ossification	0.01018	1	0.02804	0.2369	1	6	FGF18
GO: Biological Process	GO:0060978	angiogenesis involved in coronary vascular morphogenesis	0.01018	1	0.02804	0.2369	1	6	VEGFA
GO: Biological Process	GO:1902946	protein localization to early endosome	0.01018	1	0.02804	0.2369	1	6	VEGFA
GO: Biological Process	GO:0061156	pulmonary artery morphogenesis	0.01018	1	0.02804	0.2369	1	6	CITED2
GO: Biological Process	GO:0090032	negative regulation of steroid hormone biosynthetic process	0.01018	1	0.02804	0.2369	1	6	BMP2
GO: Biological Process	GO:0036072	direct ossification	0.01018	1	0.02804	0.2369	1	6	FGF18
GO: Biological Process	GO:0003406	retinal pigment epithelium development	0.01018	1	0.02804	0.2369	1	6	IHH
GO: Biological Process	GO:2000324	positive regulation of glucocorticoid receptor signaling pathway	0.01018	1	0.02804	0.2369	1	6	BDNF
GO: Biological Process	GO:0010746	regulation of plasma membrane long-chain fatty acid transport	0.01018	1	0.02804	0.2369	1	6	AKT1
GO: Biological Process	GO:0019087	transformation of host cell by virus	0.01018	1	0.02804	0.2369	1	6	INSR
GO: Biological Process	GO:0038033	positive regulation of endothelial cell chemotaxis by VEGF-activated vascular endothelial growth factor receptor signaling pathway	0.01018	1	0.02804	0.2369	1	6	VEGFA
GO: Biological Process	GO:0045656	negative regulation of monocyte differentiation	0.01018	1	0.02804	0.2369	1	6	GPR68
GO: Biological Process	GO:1900084	regulation of peptidyl-tyrosine autophosphorylation	0.01018	1	0.02804	0.2369	1	6	VEGFA
GO: Biological Process	GO:0060319	primitive erythrocyte differentiation	0.01018	1	0.02804	0.2369	1	6	VEGFA
GO: Biological Process	GO:1901490	regulation of lymphangiogenesis	0.01018	1	0.02804	0.2369	1	6	VEGFA
GO: Biological Process	GO:1903659	regulation of complement-dependent cytotoxicity	0.01018	1	0.02804	0.2369	1	6	IL11
GO: Biological Process	GO:0061304	retinal blood vessel morphogenesis	0.01018	1	0.02804	0.2369	1	6	VEGFA
GO: Biological Process	GO:0033087	negative regulation of immature T cell proliferation	0.01018	1	0.02804	0.2369	1	6	IHH
GO: Biological Process	GO:0031999	negative regulation of fatty acid beta-oxidation	0.01018	1	0.02804	0.2369	1	6	AKT1
GO: Biological Process	GO:0046668	regulation of retinal cell programmed cell death	0.01018	1	0.02804	0.2369	1	6	BDNF
GO: Biological Process	GO:0033211	adiponectin-activated signaling pathway	0.01018	1	0.02804	0.2369	1	6	ADIPOR2
GO: Biological Process	GO:0006029	proteoglycan metabolic process	0.01026	1	0.02813	0.2376	2	90	BMP2,IHH
GO: Biological Process	GO:0060840	artery development	0.01026	1	0.02813	0.2376	2	90	CITED2,VEGFA
GO: Biological Process	GO:0032411	positive regulation of transporter activity	0.01026	1	0.02813	0.2376	2	90	CALM1,KCNJ11
GO: Biological Process	GO:0045833	negative regulation of lipid metabolic process	0.01026	1	0.02813	0.2376	2	90	BMP2,AKT1
GO: Biological Process	GO:0019318	hexose metabolic process	0.01039	1	0.02844	0.2402	3	267	KCNJ11,INSR,AKT1
GO: Biological Process	GO:0032868	response to insulin	0.01039	1	0.02844	0.2402	3	267	IGF1R,INSR,AKT1
GO: Biological Process	GO:0001824	blastocyst development	0.01048	1	0.02862	0.2417	2	91	CITED2,GRN
GO: Biological Process	GO:0018210	peptidyl-threonine modification	0.01048	1	0.02862	0.2417	2	91	CALM1,AKT1
GO: Biological Process	GO:0022617	extracellular matrix disassembly	0.0107	1	0.02919	0.2466	2	92	CD44,MMP13
GO: Biological Process	GO:0030816	positive regulation of cAMP metabolic process	0.01115	1	0.03035	0.2564	2	94	CALM1,PTHLH
GO: Biological Process	GO:0045740	positive regulation of DNA replication	0.01115	1	0.03035	0.2564	2	94	IGF1R,INSR
GO: Biological Process	GO:0000122	negative regulation of transcription from RNA polymerase II promoter	0.01127	1	0.03065	0.2589	5	810	CITED2,BMP2,ETV7,VDR,VEGFA
GO: Biological Process	GO:0046849	bone remodeling	0.01137	1	0.03091	0.2611	2	95	IHH,VEGFA
GO: Biological Process	GO:1902105	regulation of leukocyte differentiation	0.01158	1	0.03124	0.2639	3	278	GPR68,CD44,IHH
GO: Biological Process	GO:0034763	negative regulation of transmembrane transport	0.0116	1	0.03124	0.2639	2	96	CALM1,AKT1
GO: Biological Process	GO:2000177	regulation of neural precursor cell proliferation	0.0116	1	0.03124	0.2639	2	96	BDNF,VEGFA
GO: Biological Process	GO:0051223	regulation of protein transport	0.01172	1	0.03124	0.2639	5	818	IL18,GPR68,KCNJ11,MMP13,NOS2
GO: Biological Process	GO:0043588	skin development	0.01181	1	0.03124	0.2639	3	280	FOSL2,AKT1,VDR
GO: Biological Process	GO:2001243	negative regulation of intrinsic apoptotic signaling pathway	0.01183	1	0.03124	0.2639	2	97	CD44,AKT1
GO: Biological Process	GO:0032819	positive regulation of natural killer cell proliferation	0.01187	1	0.03124	0.2639	1	7	IL18
GO: Biological Process	GO:0003129	heart induction	0.01187	1	0.03124	0.2639	1	7	BMP2
GO: Biological Process	GO:0060558	regulation of calcidiol 1-monooxygenase activity	0.01187	1	0.03124	0.2639	1	7	VDR
GO: Biological Process	GO:0032347	regulation of aldosterone biosynthetic process	0.01187	1	0.03124	0.2639	1	7	BMP2
GO: Biological Process	GO:0060982	coronary artery morphogenesis	0.01187	1	0.03124	0.2639	1	7	VEGFA
GO: Biological Process	GO:0032071	regulation of endodeoxyribonuclease activity	0.01187	1	0.03124	0.2639	1	7	AKT1
GO: Biological Process	GO:1902669	positive regulation of axon guidance	0.01187	1	0.03124	0.2639	1	7	VEGFA
GO: Biological Process	GO:2000561	regulation of CD4-positive, alpha-beta T cell proliferation	0.01187	1	0.03124	0.2639	1	7	CD44
GO: Biological Process	GO:0038089	positive regulation of cell migration by vascular endothelial growth factor signaling pathway	0.01187	1	0.03124	0.2639	1	7	VEGFA
GO: Biological Process	GO:0048842	positive regulation of axon extension involved in axon guidance	0.01187	1	0.03124	0.2639	1	7	VEGFA
GO: Biological Process	GO:0060753	regulation of mast cell chemotaxis	0.01187	1	0.03124	0.2639	1	7	VEGFA
GO: Biological Process	GO:0033034	positive regulation of myeloid cell apoptotic process	0.01187	1	0.03124	0.2639	1	7	CD44
GO: Biological Process	GO:1901725	regulation of histone deacetylase activity	0.01187	1	0.03124	0.2639	1	7	VEGFA
GO: Biological Process	GO:1902065	response to L-glutamate	0.01187	1	0.03124	0.2639	1	7	IGF1R
GO: Biological Process	GO:2000544	regulation of endothelial cell chemotaxis to fibroblast growth factor	0.01187	1	0.03124	0.2639	1	7	FGF18
GO: Biological Process	GO:0003307	regulation of Wnt signaling pathway involved in heart development	0.01187	1	0.03124	0.2639	1	7	BMP2
GO: Biological Process	GO:0071316	cellular response to nicotine	0.01187	1	0.03124	0.2639	1	7	KCNJ11
GO: Biological Process	GO:0001554	luteolysis	0.01187	1	0.03124	0.2639	1	7	MMP13
GO: Biological Process	GO:0031946	regulation of glucocorticoid biosynthetic process	0.01187	1	0.03124	0.2639	1	7	BMP2
GO: Biological Process	GO:0035768	endothelial cell chemotaxis to fibroblast growth factor	0.01187	1	0.03124	0.2639	1	7	FGF18
GO: Biological Process	GO:0031547	brain-derived neurotrophic factor receptor signaling pathway	0.01187	1	0.03124	0.2639	1	7	BDNF
GO: Biological Process	GO:0097278	complement-dependent cytotoxicity	0.01187	1	0.03124	0.2639	1	7	IL11
GO: Biological Process	GO:0035360	positive regulation of peroxisome proliferator activated receptor signaling pathway	0.01187	1	0.03124	0.2639	1	7	CITED2
GO: Biological Process	GO:1904847	regulation of cell chemotaxis to fibroblast growth factor	0.01187	1	0.03124	0.2639	1	7	FGF18
GO: Biological Process	GO:0035766	cell chemotaxis to fibroblast growth factor	0.01187	1	0.03124	0.2639	1	7	FGF18
GO: Biological Process	GO:0048010	vascular endothelial growth factor receptor signaling pathway	0.01207	1	0.03171	0.2679	2	98	FGF18,VEGFA
GO: Biological Process	GO:1904019	epithelial cell apoptotic process	0.01207	1	0.03171	0.2679	2	98	IL11,IGF1R
GO: Biological Process	GO:0030072	peptide hormone secretion	0.01215	1	0.0319	0.2695	3	283	GPR68,KCNJ11,NOS2
GO: Biological Process	GO:0019395	fatty acid oxidation	0.0123	1	0.03227	0.2726	2	99	AKT1,ADIPOR2
GO: Biological Process	GO:0009798	axis specification	0.01254	1	0.03279	0.277	2	100	CITED2,SOST
GO: Biological Process	GO:2001257	regulation of cation channel activity	0.01254	1	0.03279	0.277	2	100	CALM1,KCNJ11
GO: Biological Process	GO:0045778	positive regulation of ossification	0.01254	1	0.03279	0.277	2	100	BMP2,VEGFA
GO: Biological Process	GO:0034440	lipid oxidation	0.01278	1	0.03332	0.2814	2	101	AKT1,ADIPOR2
GO: Biological Process	GO:2000106	regulation of leukocyte apoptotic process	0.01278	1	0.03332	0.2814	2	101	IL18,CD44
GO: Biological Process	GO:0030316	osteoclast differentiation	0.01278	1	0.03332	0.2814	2	101	GPR68,TNFRSF11A
GO: Biological Process	GO:0009306	protein secretion	0.01307	1	0.03403	0.2875	4	543	GPR68,KCNJ11,MMP13,NOS2
GO: Biological Process	GO:0002790	peptide secretion	0.0131	1	0.03403	0.2875	3	291	GPR68,KCNJ11,NOS2
GO: Biological Process	GO:0051146	striated muscle cell differentiation	0.0131	1	0.03403	0.2875	3	291	BMP2,AKT1,VEGFA
GO: Biological Process	GO:0000904	cell morphogenesis involved in differentiation	0.01323	1	0.03403	0.2875	5	843	BMP2,IGF1R,IHH,BDNF,VEGFA
GO: Biological Process	GO:0043255	regulation of carbohydrate biosynthetic process	0.01327	1	0.03403	0.2875	2	103	INSR,AKT1
GO: Biological Process	GO:0050868	negative regulation of T cell activation	0.01327	1	0.03403	0.2875	2	103	CD44,IHH
GO: Biological Process	GO:0090066	regulation of anatomical structure size	0.0134	1	0.03403	0.2875	4	547	AKT1,NOS2,BDNF,VEGFA
GO: Biological Process	GO:0030516	regulation of axon extension	0.01351	1	0.03403	0.2875	2	104	BDNF,VEGFA
GO: Biological Process	GO:0035739	CD4-positive, alpha-beta T cell proliferation	0.01355	1	0.03403	0.2875	1	8	CD44
GO: Biological Process	GO:2000254	regulation of male germ cell proliferation	0.01355	1	0.03403	0.2875	1	8	IL18
GO: Biological Process	GO:0097011	cellular response to granulocyte macrophage colony-stimulating factor stimulus	0.01355	1	0.03403	0.2875	1	8	AKT1
GO: Biological Process	GO:0032287	peripheral nervous system myelin maintenance	0.01355	1	0.03403	0.2875	1	8	AKT1
GO: Biological Process	GO:0032353	negative regulation of hormone biosynthetic process	0.01355	1	0.03403	0.2875	1	8	BMP2
GO: Biological Process	GO:0060179	male mating behavior	0.01355	1	0.03403	0.2875	1	8	GRN
GO: Biological Process	GO:0015911	plasma membrane long-chain fatty acid transport	0.01355	1	0.03403	0.2875	1	8	AKT1
GO: Biological Process	GO:0060136	embryonic process involved in female pregnancy	0.01355	1	0.03403	0.2875	1	8	CITED2
GO: Biological Process	GO:0038107	nodal signaling pathway involved in determination of left/right asymmetry	0.01355	1	0.03403	0.2875	1	8	CITED2
GO: Biological Process	GO:0031659	positive regulation of cyclin-dependent protein serine/threonine kinase activity involved in G1/S transition of mitotic cell cycle	0.01355	1	0.03403	0.2875	1	8	AKT1
GO: Biological Process	GO:0051135	positive regulation of NK T cell activation	0.01355	1	0.03403	0.2875	1	8	IL18
GO: Biological Process	GO:0001866	NK T cell proliferation	0.01355	1	0.03403	0.2875	1	8	IL18
GO: Biological Process	GO:0044332	Wnt signaling pathway involved in dorsal/ventral axis specification	0.01355	1	0.03403	0.2875	1	8	SOST
GO: Biological Process	GO:0048170	positive regulation of long-term neuronal synaptic plasticity	0.01355	1	0.03403	0.2875	1	8	BDNF
GO: Biological Process	GO:0032070	regulation of deoxyribonuclease activity	0.01355	1	0.03403	0.2875	1	8	AKT1
GO: Biological Process	GO:0007406	negative regulation of neuroblast proliferation	0.01355	1	0.03403	0.2875	1	8	BDNF
GO: Biological Process	GO:1903960	negative regulation of anion transmembrane transport	0.01355	1	0.03403	0.2875	1	8	AKT1
GO: Biological Process	GO:1900164	nodal signaling pathway involved in determination of lateral mesoderm left/right asymmetry	0.01355	1	0.03403	0.2875	1	8	CITED2
GO: Biological Process	GO:0034651	cortisol biosynthetic process	0.01355	1	0.03403	0.2875	1	8	BMP2
GO: Biological Process	GO:0060710	chorio-allantoic fusion	0.01355	1	0.03403	0.2875	1	8	VCAM1
GO: Biological Process	GO:1900094	regulation of transcription from RNA polymerase II promoter involved in determination of left/right symmetry	0.01355	1	0.03403	0.2875	1	8	CITED2
GO: Biological Process	GO:0002158	osteoclast proliferation	0.01355	1	0.03403	0.2875	1	8	NPR3
GO: Biological Process	GO:1903012	positive regulation of bone development	0.01355	1	0.03403	0.2875	1	8	GPR68
GO: Biological Process	GO:0070141	response to UV-A	0.01355	1	0.03403	0.2875	1	8	AKT1
GO: Biological Process	GO:0090045	positive regulation of deacetylase activity	0.01355	1	0.03403	0.2875	1	8	VEGFA
GO: Biological Process	GO:0032229	negative regulation of synaptic transmission, GABAergic	0.01355	1	0.03403	0.2875	1	8	BDNF
GO: Biological Process	GO:0060267	positive regulation of respiratory burst	0.01355	1	0.03403	0.2875	1	8	INSR
GO: Biological Process	GO:0032344	regulation of aldosterone metabolic process	0.01355	1	0.03403	0.2875	1	8	BMP2
GO: Biological Process	GO:0071679	commissural neuron axon guidance	0.01355	1	0.03403	0.2875	1	8	VEGFA
GO: Biological Process	GO:2000020	positive regulation of male gonad development	0.01355	1	0.03403	0.2875	1	8	CITED2
GO: Biological Process	GO:0019221	cytokine-mediated signaling pathway	0.0139	1	0.03488	0.2946	4	553	CD44,TNFRSF11A,ADIPOR2,VCAM1
GO: Biological Process	GO:0032368	regulation of lipid transport	0.01401	1	0.03509	0.2964	2	106	AKT1,TNFRSF11A
GO: Biological Process	GO:0090100	positive regulation of transmembrane receptor protein serine/threonine kinase signaling pathway	0.01401	1	0.03509	0.2964	2	106	CITED2,BMP2
GO: Biological Process	GO:0030522	intracellular receptor signaling pathway	0.01421	1	0.03555	0.3003	3	300	CITED2,BDNF,VDR
GO: Biological Process	GO:0002576	platelet degranulation	0.01426	1	0.03565	0.3012	2	107	CALM1,VEGFA
GO: Biological Process	GO:0042102	positive regulation of T cell proliferation	0.01452	1	0.03622	0.3059	2	108	IL18,VCAM1
GO: Biological Process	GO:0099565	chemical synaptic transmission, postsynaptic	0.01452	1	0.03622	0.3059	2	108	AKT1,BDNF
GO: Biological Process	GO:0048863	stem cell differentiation	0.01459	1	0.03636	0.3072	3	303	CITED2,BMP2,SP7
GO: Biological Process	GO:0019953	sexual reproduction	0.01472	1	0.03666	0.3097	5	866	IL18,AKT1,GRN,IHH,NOS2
GO: Biological Process	GO:0033273	response to vitamin	0.01477	1	0.03667	0.3097	2	109	INSR,VDR
GO: Biological Process	GO:1904951	positive regulation of establishment of protein localization	0.01503	1	0.03667	0.3097	4	566	IL18,GPR68,AKT1,MMP13
GO: Biological Process	GO:2000192	negative regulation of fatty acid transport	0.01523	1	0.03667	0.3097	1	9	AKT1
GO: Biological Process	GO:0032817	regulation of natural killer cell proliferation	0.01523	1	0.03667	0.3097	1	9	IL18
GO: Biological Process	GO:0060556	regulation of vitamin D biosynthetic process	0.01523	1	0.03667	0.3097	1	9	VDR
GO: Biological Process	GO:0046642	negative regulation of alpha-beta T cell proliferation	0.01523	1	0.03667	0.3097	1	9	CD44
GO: Biological Process	GO:0090050	positive regulation of cell migration involved in sprouting angiogenesis	0.01523	1	0.03667	0.3097	1	9	VEGFA
GO: Biological Process	GO:0090031	positive regulation of steroid hormone biosynthetic process	0.01523	1	0.03667	0.3097	1	9	IGF1R
GO: Biological Process	GO:0097084	vascular smooth muscle cell development	0.01523	1	0.03667	0.3097	1	9	VEGFA
GO: Biological Process	GO:0090594	inflammatory response to wounding	0.01523	1	0.03667	0.3097	1	9	CD44
GO: Biological Process	GO:0071374	cellular response to parathyroid hormone stimulus	0.01523	1	0.03667	0.3097	1	9	SOST
GO: Biological Process	GO:0090037	positive regulation of protein kinase C signaling	0.01523	1	0.03667	0.3097	1	9	VEGFA
GO: Biological Process	GO:0060426	lung vasculature development	0.01523	1	0.03667	0.3097	1	9	VEGFA
GO: Biological Process	GO:0043569	negative regulation of insulin-like growth factor receptor signaling pathway	0.01523	1	0.03667	0.3097	1	9	BMP2
GO: Biological Process	GO:0051342	regulation of cyclic-nucleotide phosphodiesterase activity	0.01523	1	0.03667	0.3097	1	9	CALM1
GO: Biological Process	GO:0060316	positive regulation of ryanodine-sensitive calcium-release channel activity	0.01523	1	0.03667	0.3097	1	9	CALM1
GO: Biological Process	GO:0061042	vascular wound healing	0.01523	1	0.03667	0.3097	1	9	ADIPOR2
GO: Biological Process	GO:0033085	negative regulation of T cell differentiation in thymus	0.01523	1	0.03667	0.3097	1	9	IHH
GO: Biological Process	GO:1901844	regulation of cell communication by electrical coupling involved in cardiac conduction	0.01523	1	0.03667	0.3097	1	9	CALM1
GO: Biological Process	GO:0097012	response to granulocyte macrophage colony-stimulating factor	0.01523	1	0.03667	0.3097	1	9	AKT1
GO: Biological Process	GO:0034650	cortisol metabolic process	0.01523	1	0.03667	0.3097	1	9	BMP2
GO: Biological Process	GO:0051712	positive regulation of killing of cells of other organism	0.01523	1	0.03667	0.3097	1	9	NOS2
GO: Biological Process	GO:0003140	determination of left/right asymmetry in lateral mesoderm	0.01523	1	0.03667	0.3097	1	9	CITED2
GO: Biological Process	GO:0031657	regulation of cyclin-dependent protein serine/threonine kinase activity involved in G1/S transition of mitotic cell cycle	0.01523	1	0.03667	0.3097	1	9	AKT1
GO: Biological Process	GO:0048739	cardiac muscle fiber development	0.01523	1	0.03667	0.3097	1	9	VEGFA
GO: Biological Process	GO:0061101	neuroendocrine cell differentiation	0.01523	1	0.03667	0.3097	1	9	BMP2
GO: Biological Process	GO:0031943	regulation of glucocorticoid metabolic process	0.01523	1	0.03667	0.3097	1	9	BMP2
GO: Biological Process	GO:0048680	positive regulation of axon regeneration	0.01523	1	0.03667	0.3097	1	9	IGF1R
GO: Biological Process	GO:0051133	regulation of NK T cell activation	0.01523	1	0.03667	0.3097	1	9	IL18
GO: Biological Process	GO:0046666	retinal cell programmed cell death	0.01523	1	0.03667	0.3097	1	9	BDNF
GO: Biological Process	GO:2000726	negative regulation of cardiac muscle cell differentiation	0.01523	1	0.03667	0.3097	1	9	BMP2
GO: Biological Process	GO:0031077	post-embryonic camera-type eye development	0.01523	1	0.03667	0.3097	1	9	VEGFA
GO: Biological Process	GO:0061032	visceral serous pericardium development	0.01523	1	0.03667	0.3097	1	9	VCAM1
GO: Biological Process	GO:0002246	wound healing involved in inflammatory response	0.01523	1	0.03667	0.3097	1	9	CD44
GO: Biological Process	GO:0032351	negative regulation of hormone metabolic process	0.01523	1	0.03667	0.3097	1	9	BMP2
GO: Biological Process	GO:0070561	vitamin D receptor signaling pathway	0.01523	1	0.03667	0.3097	1	9	VDR
GO: Biological Process	GO:0071214	cellular response to abiotic stimulus	0.01537	1	0.03697	0.3123	3	309	CALM1,GPR68,AKT1
GO: Biological Process	GO:1903038	negative regulation of leukocyte cell-cell adhesion	0.01555	1	0.03737	0.3157	2	112	CD44,IHH
GO: Biological Process	GO:0043086	negative regulation of catalytic activity	0.01569	1	0.03764	0.3179	5	880	NPR3,IGF1R,CD44,AKT1,VEGFA
GO: Biological Process	GO:0071705	nitrogen compound transport	0.01569	1	0.03764	0.3179	5	880	IL18,GPR68,KCNJ11,NOS2,BDNF
GO: Biological Process	GO:0030218	erythrocyte differentiation	0.01582	1	0.03787	0.3199	2	113	CITED2,VEGFA
GO: Biological Process	GO:2001237	negative regulation of extrinsic apoptotic signaling pathway	0.01582	1	0.03787	0.3199	2	113	AKT1,VEGFA
GO: Biological Process	GO:0005996	monosaccharide metabolic process	0.0159	1	0.03804	0.3214	3	313	KCNJ11,INSR,AKT1
GO: Biological Process	GO:1903524	positive regulation of blood circulation	0.01608	1	0.03843	0.3247	2	114	AKT1,NOS2
GO: Biological Process	GO:0032147	activation of protein kinase activity	0.01631	1	0.03891	0.3287	3	316	BMP2,INSR,VEGFA
GO: Biological Process	GO:0008202	steroid metabolic process	0.01631	1	0.03891	0.3287	3	316	BMP2,IGF1R,VDR
GO: Biological Process	GO:0035821	modification of morphology or physiology of other organism	0.01635	1	0.03897	0.3292	2	115	INSR,NOS2
GO: Biological Process	GO:1904064	positive regulation of cation transmembrane transport	0.01662	1	0.03957	0.3343	2	116	CALM1,KCNJ11
GO: Biological Process	GO:0044262	cellular carbohydrate metabolic process	0.01686	1	0.03983	0.3364	3	320	CALM1,INSR,AKT1
GO: Biological Process	GO:0034116	positive regulation of heterotypic cell-cell adhesion	0.01691	1	0.03983	0.3364	1	10	CD44
GO: Biological Process	GO:0060215	primitive hemopoiesis	0.01691	1	0.03983	0.3364	1	10	VEGFA
GO: Biological Process	GO:2000399	negative regulation of thymocyte aggregation	0.01691	1	0.03983	0.3364	1	10	IHH
GO: Biological Process	GO:0061308	cardiac neural crest cell development involved in heart development	0.01691	1	0.03983	0.3364	1	10	CITED2
GO: Biological Process	GO:0097201	negative regulation of transcription from RNA polymerase II promoter in response to stress	0.01691	1	0.03983	0.3364	1	10	CITED2
GO: Biological Process	GO:0090186	regulation of pancreatic juice secretion	0.01691	1	0.03983	0.3364	1	10	MMP13
GO: Biological Process	GO:0070572	positive regulation of neuron projection regeneration	0.01691	1	0.03983	0.3364	1	10	IGF1R
GO: Biological Process	GO:2001204	regulation of osteoclast development	0.01691	1	0.03983	0.3364	1	10	GPR68
GO: Biological Process	GO:0046322	negative regulation of fatty acid oxidation	0.01691	1	0.03983	0.3364	1	10	AKT1
GO: Biological Process	GO:1901841	regulation of high voltage-gated calcium channel activity	0.01691	1	0.03983	0.3364	1	10	CALM1
GO: Biological Process	GO:0032342	aldosterone biosynthetic process	0.01691	1	0.03983	0.3364	1	10	BMP2
GO: Biological Process	GO:0055007	cardiac muscle cell differentiation	0.01716	1	0.04032	0.3406	2	118	BMP2,VEGFA
GO: Biological Process	GO:1903510	mucopolysaccharide metabolic process	0.01716	1	0.04032	0.3406	2	118	CD44,AKT1
GO: Biological Process	GO:0061387	regulation of extent of cell growth	0.01716	1	0.04032	0.3406	2	118	BDNF,VEGFA
GO: Biological Process	GO:0031589	cell-substrate adhesion	0.01743	1	0.04085	0.3451	3	324	CD44,VCAM1,VEGFA
GO: Biological Process	GO:0006869	lipid transport	0.01743	1	0.04085	0.3451	3	324	AKT1,TNFRSF11A,NOS2
GO: Biological Process	GO:0034111	negative regulation of homotypic cell-cell adhesion	0.01744	1	0.04085	0.3451	2	119	CD44,IHH
GO: Biological Process	GO:0006811	ion transport	0.01769	1	0.04141	0.3498	7	1627	CALM1,KCNJ11,AKT1,TNFRSF11A,NOS2,BDNF,VDR
GO: Biological Process	GO:0022412	cellular process involved in reproduction in multicellular organism	0.01785	1	0.04175	0.3527	3	327	IL18,AKT1,IHH
GO: Biological Process	GO:0010564	regulation of cell cycle process	0.01824	1	0.04261	0.36	4	600	IGF1R,CALM1,INSR,AKT1
GO: Biological Process	GO:0045667	regulation of osteoblast differentiation	0.01856	1	0.04285	0.362	2	123	BMP2,VEGFA
GO: Biological Process	GO:0060346	bone trabecula formation	0.01858	1	0.04285	0.362	1	11	VEGFA
GO: Biological Process	GO:0002043	blood vessel endothelial cell proliferation involved in sprouting angiogenesis	0.01858	1	0.04285	0.362	1	11	VEGFA
GO: Biological Process	GO:0032341	aldosterone metabolic process	0.01858	1	0.04285	0.362	1	11	BMP2
GO: Biological Process	GO:0048672	positive regulation of collateral sprouting	0.01858	1	0.04285	0.362	1	11	BDNF
GO: Biological Process	GO:0033084	regulation of immature T cell proliferation in thymus	0.01858	1	0.04285	0.362	1	11	IHH
GO: Biological Process	GO:0060312	regulation of blood vessel remodeling	0.01858	1	0.04285	0.362	1	11	IL18
GO: Biological Process	GO:0018119	peptidyl-cysteine S-nitrosylation	0.01858	1	0.04285	0.362	1	11	NOS2
GO: Biological Process	GO:0002176	male germ cell proliferation	0.01858	1	0.04285	0.362	1	11	IL18
GO: Biological Process	GO:0031284	positive regulation of guanylate cyclase activity	0.01858	1	0.04285	0.362	1	11	NOS2
GO: Biological Process	GO:0031622	positive regulation of fever generation	0.01858	1	0.04285	0.362	1	11	TNFRSF11A
GO: Biological Process	GO:0051709	regulation of killing of cells of other organism	0.01858	1	0.04285	0.362	1	11	NOS2
GO: Biological Process	GO:0006527	arginine catabolic process	0.01858	1	0.04285	0.362	1	11	NOS2
GO: Biological Process	GO:0061307	cardiac neural crest cell differentiation involved in heart development	0.01858	1	0.04285	0.362	1	11	CITED2
GO: Biological Process	GO:0045792	negative regulation of cell size	0.01858	1	0.04285	0.362	1	11	AKT1
GO: Biological Process	GO:0034101	erythrocyte homeostasis	0.01884	1	0.0434	0.3666	2	124	CITED2,VEGFA
GO: Biological Process	GO:0010906	regulation of glucose metabolic process	0.01913	1	0.04402	0.3719	2	125	INSR,AKT1
GO: Biological Process	GO:0051345	positive regulation of hydrolase activity	0.01941	1	0.04461	0.3768	5	929	BMP2,CALM1,AKT1,FGF18,VEGFA
GO: Biological Process	GO:0016202	regulation of striated muscle tissue development	0.01941	1	0.04461	0.3768	2	126	BMP2,BDNF
GO: Biological Process	GO:0043010	camera-type eye development	0.01993	1	0.04558	0.3851	3	341	CITED2,IHH,VEGFA
GO: Biological Process	GO:0007292	female gamete generation	0.02	1	0.04558	0.3851	2	128	IHH,NOS2
GO: Biological Process	GO:0048634	regulation of muscle organ development	0.02	1	0.04558	0.3851	2	128	BMP2,BDNF
GO: Biological Process	GO:0035630	bone mineralization involved in bone maturation	0.02026	1	0.04558	0.3851	1	12	BMP2
GO: Biological Process	GO:2000322	regulation of glucocorticoid receptor signaling pathway	0.02026	1	0.04558	0.3851	1	12	BDNF
GO: Biological Process	GO:1902337	regulation of apoptotic process involved in morphogenesis	0.02026	1	0.04558	0.3851	1	12	VDR
GO: Biological Process	GO:2000018	regulation of male gonad development	0.02026	1	0.04558	0.3851	1	12	CITED2
GO: Biological Process	GO:0061299	retina vasculature morphogenesis in camera-type eye	0.02026	1	0.04558	0.3851	1	12	VEGFA
GO: Biological Process	GO:0042368	vitamin D biosynthetic process	0.02026	1	0.04558	0.3851	1	12	VDR
GO: Biological Process	GO:0001787	natural killer cell proliferation	0.02026	1	0.04558	0.3851	1	12	IL18
GO: Biological Process	GO:0048069	eye pigmentation	0.02026	1	0.04558	0.3851	1	12	IHH
GO: Biological Process	GO:0035358	regulation of peroxisome proliferator activated receptor signaling pathway	0.02026	1	0.04558	0.3851	1	12	CITED2
GO: Biological Process	GO:0048711	positive regulation of astrocyte differentiation	0.02026	1	0.04558	0.3851	1	12	BMP2
GO: Biological Process	GO:0032930	positive regulation of superoxide anion generation	0.02026	1	0.04558	0.3851	1	12	IL18
GO: Biological Process	GO:0048845	venous blood vessel morphogenesis	0.02026	1	0.04558	0.3851	1	12	VEGFA
GO: Biological Process	GO:0036093	germ cell proliferation	0.02026	1	0.04558	0.3851	1	12	IL18
GO: Biological Process	GO:0060056	mammary gland involution	0.02026	1	0.04558	0.3851	1	12	VDR
GO: Biological Process	GO:0033080	immature T cell proliferation in thymus	0.02026	1	0.04558	0.3851	1	12	IHH
GO: Biological Process	GO:0003306	Wnt signaling pathway involved in heart development	0.02026	1	0.04558	0.3851	1	12	BMP2
GO: Biological Process	GO:0017014	protein nitrosylation	0.02026	1	0.04558	0.3851	1	12	NOS2
GO: Biological Process	GO:0060315	negative regulation of ryanodine-sensitive calcium-release channel activity	0.02026	1	0.04558	0.3851	1	12	CALM1
GO: Biological Process	GO:0042640	anagen	0.02026	1	0.04558	0.3851	1	12	AKT1
GO: Biological Process	GO:0003128	heart field specification	0.02026	1	0.04558	0.3851	1	12	BMP2
GO: Biological Process	GO:0031620	regulation of fever generation	0.02026	1	0.04558	0.3851	1	12	TNFRSF11A
GO: Biological Process	GO:1901861	regulation of muscle tissue development	0.02029	1	0.04562	0.3853	2	129	BMP2,BDNF
GO: Biological Process	GO:0007368	determination of left/right symmetry	0.02059	1	0.0462	0.3903	2	130	CITED2,IHH
GO: Biological Process	GO:0050921	positive regulation of chemotaxis	0.02059	1	0.0462	0.3903	2	130	FGF18,VEGFA
GO: Biological Process	GO:0007178	transmembrane receptor protein serine/threonine kinase signaling pathway	0.02071	1	0.04643	0.3922	3	346	CITED2,BMP2,SOST
GO: Biological Process	GO:0001667	ameboidal-type cell migration	0.02086	1	0.04667	0.3942	3	347	AKT1,FGF18,VEGFA
GO: Biological Process	GO:0048638	regulation of developmental growth	0.02086	1	0.04667	0.3942	3	347	INSR,BDNF,VEGFA
GO: Biological Process	GO:0061337	cardiac conduction	0.02088	1	0.04667	0.3942	2	131	CALM1,KCNJ11
GO: Biological Process	GO:2000736	regulation of stem cell differentiation	0.02088	1	0.04667	0.3942	2	131	BMP2,SP7
GO: Biological Process	GO:0030183	B cell differentiation	0.02118	1	0.04726	0.3992	2	132	IL11,VCAM1
GO: Biological Process	GO:0048675	axon extension	0.02118	1	0.04726	0.3992	2	132	BDNF,VEGFA
GO: Biological Process	GO:0050729	positive regulation of inflammatory response	0.02148	1	0.04789	0.4045	2	133	IL18,TNFRSF11A
GO: Biological Process	GO:0001542	ovulation from ovarian follicle	0.02193	1	0.04806	0.406	1	13	NOS2
GO: Biological Process	GO:0010649	regulation of cell communication by electrical coupling	0.02193	1	0.04806	0.406	1	13	CALM1
GO: Biological Process	GO:1902166	negative regulation of intrinsic apoptotic signaling pathway in response to DNA damage by p53 class mediator	0.02193	1	0.04806	0.406	1	13	CD44
GO: Biological Process	GO:0032740	positive regulation of interleukin-17 production	0.02193	1	0.04806	0.406	1	13	IL18
GO: Biological Process	GO:0033083	regulation of immature T cell proliferation	0.02193	1	0.04806	0.406	1	13	IHH
GO: Biological Process	GO:0032725	positive regulation of granulocyte macrophage colony-stimulating factor production	0.02193	1	0.04806	0.406	1	13	IL18
GO: Biological Process	GO:0010566	regulation of ketone biosynthetic process	0.02193	1	0.04806	0.406	1	13	BMP2
GO: Biological Process	GO:2000194	regulation of female gonad development	0.02193	1	0.04806	0.406	1	13	INSR
GO: Biological Process	GO:0071107	response to parathyroid hormone	0.02193	1	0.04806	0.406	1	13	SOST
GO: Biological Process	GO:0002551	mast cell chemotaxis	0.02193	1	0.04806	0.406	1	13	VEGFA
GO: Biological Process	GO:0006705	mineralocorticoid biosynthetic process	0.02193	1	0.04806	0.406	1	13	BMP2
GO: Biological Process	GO:1904748	regulation of apoptotic process involved in development	0.02193	1	0.04806	0.406	1	13	VDR
GO: Biological Process	GO:0032308	positive regulation of prostaglandin secretion	0.02193	1	0.04806	0.406	1	13	TNFRSF11A
GO: Biological Process	GO:0031282	regulation of guanylate cyclase activity	0.02193	1	0.04806	0.406	1	13	NOS2
GO: Biological Process	GO:0030656	regulation of vitamin metabolic process	0.02193	1	0.04806	0.406	1	13	VDR
GO: Biological Process	GO:0010839	negative regulation of keratinocyte proliferation	0.02193	1	0.04806	0.406	1	13	VDR
GO: Biological Process	GO:0043217	myelin maintenance	0.02193	1	0.04806	0.406	1	13	AKT1
GO: Biological Process	GO:0036010	protein localization to endosome	0.02193	1	0.04806	0.406	1	13	VEGFA
GO: Biological Process	GO:0045618	positive regulation of keratinocyte differentiation	0.02193	1	0.04806	0.406	1	13	VDR
GO: Biological Process	GO:0042482	positive regulation of odontogenesis	0.02193	1	0.04806	0.406	1	13	BMP2
GO: Biological Process	GO:0045580	regulation of T cell differentiation	0.02209	1	0.04829	0.4079	2	135	CD44,IHH
GO: Biological Process	GO:0001906	cell killing	0.02209	1	0.04829	0.4079	2	135	IL11,NOS2
GO: Biological Process	GO:0045931	positive regulation of mitotic cell cycle	0.02209	1	0.04829	0.4079	2	135	IGF1R,INSR
GO: Biological Process	GO:0044344	cellular response to fibroblast growth factor stimulus	0.02239	1	0.04892	0.4132	2	136	CD44,FGF18
GO: Biological Process	GO:0006820	anion transport	0.02264	1	0.04943	0.4175	4	641	AKT1,TNFRSF11A,NOS2,BDNF
GO: Biological Process	GO:0010876	lipid localization	0.0228	1	0.04971	0.4199	3	359	AKT1,TNFRSF11A,NOS2
GO: Cellular Component	GO:0005615	extracellular space	2.467e-08	4.119e-06	4.119e-06	2.347e-05	14	1452	IL11,BMP2,SOST,IL18,MGP,GRN,IHH,MMP13,NOS2,PTHLH,FGF18,BDNF,VCAM1,VEGFA
GO: Cellular Component	GO:0043235	receptor complex	1.797e-05	0.003001	0.001501	0.008551	6	339	BMP2,COL10A1,IGF1R,INSR,CD44,VDR
GO: Cellular Component	GO:0005578	proteinaceous extracellular matrix	3.365e-05	0.005619	0.001873	0.01067	6	379	SOST,COL10A1,MGP,IHH,MMP13,VEGFA
GO: Cellular Component	GO:0031012	extracellular matrix	8.106e-05	0.01354	0.003384	0.01928	6	444	SOST,COL10A1,MGP,IHH,MMP13,VEGFA
GO: Cellular Component	GO:0042383	sarcolemma	0.0001178	0.01968	0.003771	0.02149	4	153	IGF1R,KCNJ11,VCAM1,VDR
GO: Cellular Component	GO:0030315	T-tubule	0.0001355	0.02263	0.003771	0.02149	3	60	IGF1R,KCNJ11,VDR
GO: Cellular Component	GO:0098797	plasma membrane protein complex	0.0002175	0.03633	0.00519	0.02957	6	532	BMP2,IGF1R,CALM1,KCNJ11,INSR,VCAM1
GO: Cellular Component	GO:0031226	intrinsic component of plasma membrane	0.0003312	0.0553	0.006913	0.03939	10	1717	BMP2,NPR3,IGF1R,CALM1,GPR68,KCNJ11,INSR,CD44,TNFRSF11A,ADIPOR2
GO: Cellular Component	GO:0005901	caveola	0.0005431	0.0907	0.01008	0.05743	3	96	IGF1R,INSR,VDR
GO: Cellular Component	GO:0044853	plasma membrane raft	0.0007054	0.1178	0.01178	0.06712	3	105	IGF1R,INSR,VDR
GO: Cellular Component	GO:0005887	integral component of plasma membrane	0.001167	0.1949	0.01771	0.1009	9	1654	BMP2,NPR3,IGF1R,CALM1,GPR68,KCNJ11,INSR,CD44,TNFRSF11A
GO: Cellular Component	GO:0071065	alpha9-beta1 integrin-vascular cell adhesion molecule-1 complex	0.003336	0.557	0.03979	0.2267	1	2	VCAM1
GO: Cellular Component	GO:0070724	BMP receptor complex	0.003336	0.557	0.03979	0.2267	1	2	BMP2
GO: Cellular Component	GO:0035692	macrophage migration inhibitory factor receptor complex	0.003336	0.557	0.03979	0.2267	1	2	CD44
