# Supplementary material for: MicroRNA Profiling in Cartilage Ageing
Source: Int J Genomics. 2017 Aug 14;2017:2713725. doi: 10.1155/2017/2713725 (PMC5584353; doi:10.1155/2017/2713725)
Supplement: Supplementary file 5 [file 2713725.f5.xls]

## Sheet: targetscan
ID	Symbol	Expr Fold Change	Source	Confidence	Symbol	Pathway	Tissue/Cell Line
hsa-miR-6875-5p	miR-3126-5p (and other miRNAs w/seed GAGGGAC)	-2.927	TargetScan Human	High (predicted)	CD44	Activated CD56bright NK cells,Activated CD56dim NK cells,Activated helper T cells,Activated Vd1 Gamma-delta T cells,Activated Vd2 Gamma-delta T cells,Adipose,Amygdala,Astrocytes,B lymphocytes not otherwise specified,BDCA-1+ dendritic cells,BDCA-3+ dendritic cells,Bladder,Brain,Brainstem,Cartilage Tissue,CD34+ cells,CD4+ T-lymphocytes,CD56bright NK cells,CD56dim NK cells,Central memory cytotoxic T…	chondrocyte
hsa-miR-6875-5p	miR-3126-5p (and other miRNAs w/seed GAGGGAC)	-2.927	TargetScan Human	High (predicted)	ETV7	Cartilage Tissue,Chondrocytes,Heart,Liver,Lung,Other Tissues and Primary Cells,Ovary,Peripheral blood lymphocytes,Placenta,Prostate Gland,Spleen,Thymus,HL-60,Other Cell Line,Other Leukemia Cell Lines,U937	chondrocyte
hsa-miR-6875-5p	miR-3126-5p (and other miRNAs w/seed GAGGGAC)	-2.927	TargetScan Human	High (predicted)	FOSL2	Activated Vd1 Gamma-delta T cells,Activated Vd2 Gamma-delta T cells,BDCA-1+ dendritic cells,BDCA-3+ dendritic cells,Brain,Cartilage Tissue,CD34+ cells,CD56bright NK cells,CD56dim NK cells,Central memory cytotoxic T cells,Chondrocytes,Cytotoxic T cells,Dermis,Effector memory cytotoxic T cells,Effector memory RA+ cytotoxic T cells,Endothelial cells not otherwise specified,Fibroblasts,Hematopoietic …	chondrocyte
hsa-miR-423-5p	miR-423-5p (and other miRNAs w/seed GAGGGGC)	1	TargetScan Human	High (predicted)	ADIPOR1	Activated CD56bright NK cells,Activated CD56dim NK cells,Activated helper T cells,Activated Vd1 Gamma-delta T cells,Activated Vd2 Gamma-delta T cells,Adipocytes,Adipose,Amygdala,B lymphocytes not otherwise specified,BDCA-1+ dendritic cells,BDCA-3+ dendritic cells,Bladder,Blood platelets,Bone marrow-derived macrophages,Brain,Brainstem,Cartilage Tissue,CD56bright NK cells,CD56dim NK cells,Central m…	chondrocyte
hsa-miR-423-5p	miR-423-5p (and other miRNAs w/seed GAGGGGC)	1	TargetScan Human	High (predicted)	BGN	Adipose,Astrocytes,Bladder,Bone marrow cells not otherwise specified,Cartilage Tissue,Chondrocytes,Endothelial cells not otherwise specified,Epidermis,Fibroblasts,Heart,Kidney,Large Intestine,Liver,Lung,Mammary Gland,Memory B cells,Mesenchymal stem cells,Monocyte-derived macrophage,Monocytes not otherwise specified,Murine NKT cells,Olfactory Bulb,Osteoblasts,Other Tissues and Primary Cells,Ovary,…	chondrocyte
hsa-miR-423-5p	miR-423-5p (and other miRNAs w/seed GAGGGGC)	1	TargetScan Human	High (predicted)	CALM1 (includes others)	Activated CD56bright NK cells,Activated CD56dim NK cells,Activated helper T cells,Activated Vd1 Gamma-delta T cells,Activated Vd2 Gamma-delta T cells,BDCA-1+ dendritic cells,BDCA-3+ dendritic cells,Brain,Cartilage Tissue,CD56bright NK cells,CD56dim NK cells,Central memory cytotoxic T cells,Central memory helper T cells,Chondrocytes,Cytotoxic T cells,Effector memory cytotoxic T cells,Effector memo…	chondrocyte
hsa-miR-423-5p	miR-423-5p (and other miRNAs w/seed GAGGGGC)	1	TargetScan Human	High (predicted)	MAPK3	Adipose,Amygdala,Astrocytes,B lymphocytes not otherwise specified,Bladder,Brain,Cartilage Tissue,Cerebellum,Cerebral Cortex,Chondrocytes,Cytotoxic T cells,Dorsal Root Ganglion,Effector T cells,Epidermis,Granule Cell Layer,Heart,Hippocampus,Hypothalamus,Immune cells not otherwise specified,Kidney,Large Intestine,Liver,Lung,Mammary Gland,Memory B cells,Murine NKT cells,Naive B cells,Neurons not oth…	chondrocyte
hsa-miR-423-5p	miR-423-5p (and other miRNAs w/seed GAGGGGC)	1	TargetScan Human	High (predicted)	NACC1	Activated helper T cells,Adipose,Amygdala,B lymphocytes not otherwise specified,BDCA-1+ dendritic cells,BDCA-3+ dendritic cells,Bladder,Brain,Brainstem,Cartilage Tissue,Caudate Nucleus,Central memory cytotoxic T cells,Cerebellum,Cerebral Cortex,Chondrocytes,Cytotoxic T cells,Dorsal Root Ganglion,Effector memory cytotoxic T cells,Effector memory RA+ cytotoxic T cells,Effector T cells,Epidermis,Hea…	chondrocyte
hsa-miR-423-5p	miR-423-5p (and other miRNAs w/seed GAGGGGC)	1	TargetScan Human	High (predicted)	NOX4	Activated Vd1 Gamma-delta T cells,Adipocytes,Adipose,Astrocytes,Brain,Cardiomyocytes,Cartilage Tissue,CD56bright NK cells,Cells not otherwise specified,Chondrocytes,Dorsal Root Ganglion,Endothelial cells not otherwise specified,Heart,Hematopoietic progenitor cells,Hepatocytes,HUVEC cells,Kidney,Large Intestine,Liver,Lung,Macrophages not otherwise specified,Microglia,Microvascular endothelial cell…	chondrocyte
hsa-miR-423-5p	miR-423-5p (and other miRNAs w/seed GAGGGGC)	1	TargetScan Human	High (predicted)	NPR3	Activated Vd1 Gamma-delta T cells,Activated Vd2 Gamma-delta T cells,Adipose,Amygdala,B lymphocytes not otherwise specified,BDCA-1+ dendritic cells,Bladder,Bone marrow-derived macrophages,Brain,Cartilage Tissue,CD56bright NK cells,Cerebellum,Cerebral Cortex,Chondrocytes,Cytotoxic T cells,Dorsal Root Ganglion,Effector memory cytotoxic T cells,Effector T cells,Endothelial cells not otherwise specifi…	chondrocyte
hsa-miR-7111-5p	miR-4723-5p (and other miRNAs w/seed GGGGGAG)	-2.51	TargetScan Human	High (predicted)	AKT1	Adipocytes,Adipose,Amygdala,B lymphocytes not otherwise specified,Bladder,Blood platelets,Brain,Cardiomyocytes,Cartilage Tissue,Cerebellum,Cerebral Cortex,Chondrocytes,Cytotoxic T cells,Dendritic cells not otherwise specified,Dorsal Root Ganglion,Effector T cells,Epidermis,Fibroblasts,Heart,Hematopoietic progenitor cells,Hippocampus,Hypothalamus,Intraepithelial T lymphocytes,Kidney,Large Intestin…	chondrocyte
hsa-miR-7111-5p	miR-4723-5p (and other miRNAs w/seed GGGGGAG)	-2.51	TargetScan Human	High (predicted)	CALM1 (includes others)	Activated CD56bright NK cells,Activated CD56dim NK cells,Activated helper T cells,Activated Vd1 Gamma-delta T cells,Activated Vd2 Gamma-delta T cells,BDCA-1+ dendritic cells,BDCA-3+ dendritic cells,Brain,Cartilage Tissue,CD56bright NK cells,CD56dim NK cells,Central memory cytotoxic T cells,Central memory helper T cells,Chondrocytes,Cytotoxic T cells,Effector memory cytotoxic T cells,Effector memo…	chondrocyte
hsa-miR-7111-5p	miR-4723-5p (and other miRNAs w/seed GGGGGAG)	-2.51	TargetScan Human	High (predicted)	FGF18	Brain,Brainstem,Cartilage Tissue,Chondrocytes,Heart,Kidney,Large Intestine,Lung,Oocytes,Other Organ Systems,Other Tissues and Primary Cells,Ovary,Pancreas,Placenta,Prostate Gland,Skeletal Muscle,Skin,Smooth Muscle,Spinal Cord,Testis,Thymus,CAKI-1,HCC-2998,HCT-116,HOP-62,IGROV1,MALME-3M,NCI-H226,NCI-H522,Other Cell Line,OVCAR-3,OVCAR-4,RPMI-8266,SF-268,SF-539,SK-OV-3,SN12C,SNB-75,SW-480,SW-620,T47…	chondrocyte
hsa-miR-7111-5p	miR-4723-5p (and other miRNAs w/seed GGGGGAG)	-2.51	TargetScan Human	High (predicted)	FOSL2	Activated Vd1 Gamma-delta T cells,Activated Vd2 Gamma-delta T cells,BDCA-1+ dendritic cells,BDCA-3+ dendritic cells,Brain,Cartilage Tissue,CD34+ cells,CD56bright NK cells,CD56dim NK cells,Central memory cytotoxic T cells,Chondrocytes,Cytotoxic T cells,Dermis,Effector memory cytotoxic T cells,Effector memory RA+ cytotoxic T cells,Endothelial cells not otherwise specified,Fibroblasts,Hematopoietic …	chondrocyte
hsa-miR-7111-5p	miR-4723-5p (and other miRNAs w/seed GGGGGAG)	-2.51	TargetScan Human	High (predicted)	IHH	Cartilage Tissue,Chondrocytes,Kidney,Large Intestine,Liver,Macrophages not otherwise specified,Other Cells,Other Organ Systems,Other Tissues and Primary Cells,Ovary,Pancreas,PBMCs,Thymus,Uterus,KM-12,Other Cell Line,Other Myeloma Cell Lines,Other Osteosarcoma Cell Lines	chondrocyte
hsa-miR-7111-5p	miR-4723-5p (and other miRNAs w/seed GGGGGAG)	-2.51	TargetScan Human	High (predicted)	IL11	Activated Vd1 Gamma-delta T cells,Activated Vd2 Gamma-delta T cells,Brain,Cartilage Tissue,Chondrocytes,Dermis,Endothelial cells not otherwise specified,Eosinophils,Epithelial cells not otherwise specified,Fibroblasts,Hematopoietic progenitor cells,Hypothalamus,Keratinocytes,Liver,Lung,Microglia,Neurons not otherwise specified,Other Cells,Other Epithelial cells,Other Nervous System,Other Organ Sy…	chondrocyte
hsa-miR-7111-5p	miR-4723-5p (and other miRNAs w/seed GGGGGAG)	-2.51	TargetScan Human	High (predicted)	KCNJ11	Beta islet cells,Brain,Cartilage Tissue,Cerebral Cortex,Chondrocytes,Heart,Hypothalamus,Kidney,Large Intestine,Liver,Microglia,Neurons not otherwise specified,Other Cells,Other Nervous System,Other Organ Systems,Pancreas,Prostate Gland,Small Intestine,Min6,Other Cell Line,Other Hepatoma Cell Lines,Other Pancreatic Cancer Cell Lines,PANC-1	chondrocyte
hsa-miR-7111-5p	miR-4723-5p (and other miRNAs w/seed GGGGGAG)	-2.51	TargetScan Human	High (predicted)	NACC1	Activated helper T cells,Adipose,Amygdala,B lymphocytes not otherwise specified,BDCA-1+ dendritic cells,BDCA-3+ dendritic cells,Bladder,Brain,Brainstem,Cartilage Tissue,Caudate Nucleus,Central memory cytotoxic T cells,Cerebellum,Cerebral Cortex,Chondrocytes,Cytotoxic T cells,Dorsal Root Ganglion,Effector memory cytotoxic T cells,Effector memory RA+ cytotoxic T cells,Effector T cells,Epidermis,Hea…	chondrocyte
hsa-miR-7111-5p	miR-4723-5p (and other miRNAs w/seed GGGGGAG)	-2.51	TargetScan Human	High (predicted)	PTHLH	Activated Vd1 Gamma-delta T cells,Adrenal Gland,Bladder,Brain,Brainstem,Cartilage Tissue,Cerebellum,Cerebral Cortex,Chondrocytes,Dermis,Endothelial cells not otherwise specified,Epithelial cells not otherwise specified,Esophagus,Fibroblasts,Granule cells,Hippocampus,Keratinocytes,Kidney,Lung,Lymphocytes not otherwise specified,Mammary Gland,Mature monocyte-derived dendritic cells,Neurons not othe…	chondrocyte
hsa-miR-7111-5p	miR-4723-5p (and other miRNAs w/seed GGGGGAG)	-2.51	TargetScan Human	High (predicted)	VDR	Adipocytes,Adipose,Adrenal Gland,B lymphocytes not otherwise specified,Brain,Cartilage Tissue,Cerebellum,Cerebral Cortex,Chondrocytes,Dendritic cells not otherwise specified,Epidermis,Epithelial cells not otherwise specified,Fibroblasts,Heart,Hepatocytes,Hippocampus,HUVEC cells,Immune cells not otherwise specified,Kidney,Large Intestine,Liver,Lung,Macrophages not otherwise specified,Memory B cell…	chondrocyte
hsa-miR-6774-5p	miR-635 (and other miRNAs w/seed CUUGGGC)	-1.415	TargetScan Human	High (predicted)	VDR	Adipocytes,Adipose,Adrenal Gland,B lymphocytes not otherwise specified,Brain,Cartilage Tissue,Cerebellum,Cerebral Cortex,Chondrocytes,Dendritic cells not otherwise specified,Epidermis,Epithelial cells not otherwise specified,Fibroblasts,Heart,Hepatocytes,Hippocampus,HUVEC cells,Immune cells not otherwise specified,Kidney,Large Intestine,Liver,Lung,Macrophages not otherwise specified,Memory B cell…	chondrocyte
hsa-miR-6795-5p	miR-6795-5p (and other miRNAs w/seed GGGGGGA)	-1.332	TargetScan Human	High (predicted)	CALM1 (includes others)	Activated CD56bright NK cells,Activated CD56dim NK cells,Activated helper T cells,Activated Vd1 Gamma-delta T cells,Activated Vd2 Gamma-delta T cells,BDCA-1+ dendritic cells,BDCA-3+ dendritic cells,Brain,Cartilage Tissue,CD56bright NK cells,CD56dim NK cells,Central memory cytotoxic T cells,Central memory helper T cells,Chondrocytes,Cytotoxic T cells,Effector memory cytotoxic T cells,Effector memo…	chondrocyte
hsa-miR-6795-5p	miR-6795-5p (and other miRNAs w/seed GGGGGGA)	-1.332	TargetScan Human	High (predicted)	CITED2	Activated Vd1 Gamma-delta T cells,Activated Vd2 Gamma-delta T cells,Adipose,Amygdala,B lymphocytes not otherwise specified,BDCA-1+ dendritic cells,BDCA-3+ dendritic cells,Bladder,Brain,Cartilage Tissue,CD56dim NK cells,Central memory helper T cells,Cerebellum,Cerebral Cortex,Chondrocytes,Cytotoxic T cells,Dorsal Root Ganglion,Effector memory helper T cells,Effector T cells,Epidermis,Heart,Hippoca…	chondrocyte
hsa-miR-6795-5p	miR-6795-5p (and other miRNAs w/seed GGGGGGA)	-1.332	TargetScan Human	High (predicted)	GPR68	Activated helper T cells,Brain,Cartilage Tissue,Central memory cytotoxic T cells,Cerebellum,Chondrocytes,Cytotoxic T cells,Effector memory cytotoxic T cells,Effector memory RA+ cytotoxic T cells,Granule cells,Liver,Monocyte-derived macrophage,Naive helper T cells,Other Cells,Other Nervous System,Other Neurons,Other Organ Systems,Other Tissues and Primary Cells,Pancreas,Placenta,Smooth Muscle,Smoo…	chondrocyte
hsa-miR-6795-5p	miR-6795-5p (and other miRNAs w/seed GGGGGGA)	-1.332	TargetScan Human	High (predicted)	INSR	Adipocytes,Adipose,Amygdala,B lymphocytes not otherwise specified,BDCA-1+ dendritic cells,BDCA-3+ dendritic cells,Bladder,Brain,Cartilage Tissue,Cerebellum,Cerebral Cortex,Cerebral Ventricles,Chondrocytes,Choroid Plexus,Dorsal Root Ganglion,Endothelial cells not otherwise specified,Epidermis,Fibroblasts,Granule Cell Layer,Granulosa cells,Heart,Hematopoietic progenitor cells,Hepatocytes,Hippocampu…	chondrocyte
hsa-miR-6795-5p	miR-6795-5p (and other miRNAs w/seed GGGGGGA)	-1.332	TargetScan Human	High (predicted)	NACC1	Activated helper T cells,Adipose,Amygdala,B lymphocytes not otherwise specified,BDCA-1+ dendritic cells,BDCA-3+ dendritic cells,Bladder,Brain,Brainstem,Cartilage Tissue,Caudate Nucleus,Central memory cytotoxic T cells,Cerebellum,Cerebral Cortex,Chondrocytes,Cytotoxic T cells,Dorsal Root Ganglion,Effector memory cytotoxic T cells,Effector memory RA+ cytotoxic T cells,Effector T cells,Epidermis,Hea…	chondrocyte
hsa-miR-6795-5p	miR-6795-5p (and other miRNAs w/seed GGGGGGA)	-1.332	TargetScan Human	High (predicted)	TNFRSF11A	BDCA-3+ dendritic cells,Bone marrow cells not otherwise specified,Bone marrow-derived macrophages,Calvaria,Cartilage Tissue,CD56bright NK cells,Central memory cytotoxic T cells,Chondrocytes,Dendritic cells not otherwise specified,Dorsal Root Ganglion,Effector memory cytotoxic T cells,Effector memory RA+ cytotoxic T cells,Epithelial cells not otherwise specified,Fibroblasts,Hepatocytes,HUVEC cells…	chondrocyte
hsa-miR-6824-5p	miR-6824-5p (miRNAs w/seed UAGGGGA)	-2.763	TargetScan Human	High (predicted)	CALM1 (includes others)	Activated CD56bright NK cells,Activated CD56dim NK cells,Activated helper T cells,Activated Vd1 Gamma-delta T cells,Activated Vd2 Gamma-delta T cells,BDCA-1+ dendritic cells,BDCA-3+ dendritic cells,Brain,Cartilage Tissue,CD56bright NK cells,CD56dim NK cells,Central memory cytotoxic T cells,Central memory helper T cells,Chondrocytes,Cytotoxic T cells,Effector memory cytotoxic T cells,Effector memo…	chondrocyte
hsa-miR-6824-5p	miR-6824-5p (miRNAs w/seed UAGGGGA)	-2.763	TargetScan Human	High (predicted)	COL10A1	Cartilage Tissue,Chondrocytes,Mesenchymal stem cells,Monocyte-derived macrophage,Monocytes not otherwise specified,Osteoblasts,Other Cells,Other Organ Systems,Other Tissues and Primary Cells,BT-549,DU-145,HL-60,HOP-62,HS 578T,HT29,LOX IMVI,M14,MDA-MB-231,MOLT-4,NCI-H23,NCI-H332M,Other Cell Line,RPMI-8266,SF-295,SF-539,SK-MEL-2,SK-MEL-28,SK-OV-3,SNB-19,SNB-75,THP-1	chondrocyte

## Sheet: gene ontology
Category	ID	Name	p-value	q-value Bonferroni	q-value FDR B&H	q-value FDR B&Y	Hit Count in Query List	Hit Count in Genome	Hit in Query List
GO: Molecular Function	GO:0030235	nitric-oxide synthase regulator activity	5.837e-05	0.01541	0.005996	0.03691	2	10	AKT1,CALM1
GO: Molecular Function	GO:0060089	molecular transducer activity	6.814e-05	0.01799	0.005996	0.03691	9	1708	CD44,NPR3,ADIPOR1,TNFRSF11A,CALM1,GPR68,KCNJ11,INSR,VDR
GO: Molecular Function	GO:0004872	receptor activity	6.814e-05	0.01799	0.005996	0.03691	9	1708	CD44,NPR3,ADIPOR1,TNFRSF11A,CALM1,GPR68,KCNJ11,INSR,VDR
GO: Molecular Function	GO:0099600	transmembrane receptor activity	0.0001064	0.02809	0.006331	0.03897	8	1386	CD44,NPR3,ADIPOR1,TNFRSF11A,CALM1,GPR68,KCNJ11,INSR
GO: Molecular Function	GO:0042562	hormone binding	0.0001199	0.03166	0.006331	0.03897	3	83	NPR3,ADIPOR1,INSR
GO: Molecular Function	GO:0005102	receptor binding	0.0002985	0.0788	0.01313	0.08083	8	1607	CD44,IL11,IHH,CALM1,PTHLH,FGF18,INSR,VDR
GO: Molecular Function	GO:0070851	growth factor receptor binding	0.0005951	0.1571	0.01626	0.1001	3	143	CD44,IL11,FGF18
GO: Molecular Function	GO:0004871	signal transducer activity	0.0006132	0.1619	0.01626	0.1001	8	1786	CD44,NPR3,ADIPOR1,TNFRSF11A,MAPK3,GPR68,INSR,VDR
GO: Molecular Function	GO:0019901	protein kinase binding	0.0006404	0.1691	0.01626	0.1001	5	622	CD44,AKT1,ADIPOR1,CALM1,INSR
GO: Molecular Function	GO:0043548	phosphatidylinositol 3-kinase binding	0.000894	0.236	0.01626	0.1001	2	38	CALM1,INSR
GO: Molecular Function	GO:0038023	signaling receptor activity	0.000911	0.2405	0.01626	0.1001	7	1436	CD44,NPR3,ADIPOR1,TNFRSF11A,GPR68,INSR,VDR
GO: Molecular Function	GO:0019900	kinase binding	0.001043	0.2754	0.01626	0.1001	5	693	CD44,AKT1,ADIPOR1,CALM1,INSR
GO: Molecular Function	GO:0005142	interleukin-11 receptor binding	0.00117	0.309	0.01626	0.1001	1	1	IL11
GO: Molecular Function	GO:0005009	insulin-activated receptor activity	0.00117	0.309	0.01626	0.1001	1	1	INSR
GO: Molecular Function	GO:1902121	lithocholic acid binding	0.00117	0.309	0.01626	0.1001	1	1	VDR
GO: Molecular Function	GO:0008434	calcitriol receptor activity	0.00117	0.309	0.01626	0.1001	1	1	VDR
GO: Molecular Function	GO:0031405	lipoic acid binding	0.00117	0.309	0.01626	0.1001	1	1	INSR
GO: Molecular Function	GO:0038186	lithocholic acid receptor activity	0.00117	0.309	0.01626	0.1001	1	1	VDR
GO: Molecular Function	GO:1902098	calcitriol binding	0.00117	0.309	0.01626	0.1001	1	1	VDR
GO: Molecular Function	GO:0017046	peptide hormone binding	0.001253	0.3307	0.01626	0.1001	2	45	NPR3,INSR
GO: Molecular Function	GO:0019902	phosphatase binding	0.001294	0.3415	0.01626	0.1001	3	187	AKT1,MAPK3,INSR
GO: Molecular Function	GO:0016773	phosphotransferase activity, alcohol group as acceptor	0.001776	0.4688	0.02131	0.1311	5	781	AKT1,MAPK3,CALM1,FGF18,INSR
GO: Molecular Function	GO:1902271	D3 vitamins binding	0.002337	0.6169	0.0257	0.1582	1	2	VDR
GO: Molecular Function	GO:0097003	adipokinetic hormone receptor activity	0.002337	0.6169	0.0257	0.1582	1	2	ADIPOR1
GO: Molecular Function	GO:0016301	kinase activity	0.002614	0.6901	0.0272	0.1674	5	853	AKT1,MAPK3,CALM1,FGF18,INSR
GO: Molecular Function	GO:0004888	transmembrane signaling receptor activity	0.003397	0.8968	0.0272	0.1674	6	1327	CD44,NPR3,ADIPOR1,TNFRSF11A,GPR68,INSR
GO: Molecular Function	GO:0070644	vitamin D response element binding	0.003503	0.9248	0.0272	0.1674	1	3	VDR
GO: Molecular Function	GO:0038181	bile acid receptor activity	0.003503	0.9248	0.0272	0.1674	1	3	VDR
GO: Molecular Function	GO:0019826	oxygen sensor activity	0.003503	0.9248	0.0272	0.1674	1	3	NOX4
GO: Molecular Function	GO:0031800	type 3 metabotropic glutamate receptor binding	0.003503	0.9248	0.0272	0.1674	1	3	CALM1
GO: Molecular Function	GO:0031997	N-terminal myristoylation domain binding	0.003503	0.9248	0.0272	0.1674	1	3	CALM1
GO: Molecular Function	GO:0055100	adiponectin binding	0.003503	0.9248	0.0272	0.1674	1	3	ADIPOR1
GO: Molecular Function	GO:0016941	natriuretic peptide receptor activity	0.003503	0.9248	0.0272	0.1674	1	3	NPR3
GO: Molecular Function	GO:0043423	3-phosphoinositide-dependent protein kinase binding	0.003503	0.9248	0.0272	0.1674	1	3	INSR
GO: Molecular Function	GO:0051219	phosphoprotein binding	0.003713	0.9801	0.02791	0.1718	2	78	CD44,MAPK3
GO: Molecular Function	GO:0033293	monocarboxylic acid binding	0.003806	1	0.02791	0.1718	2	79	INSR,VDR
GO: Molecular Function	GO:0051425	PTB domain binding	0.004668	1	0.03243	0.1996	1	4	INSR
GO: Molecular Function	GO:0050693	LBD domain binding	0.004668	1	0.03243	0.1996	1	4	CITED2
GO: Molecular Function	GO:0019899	enzyme binding	0.00507	1	0.03432	0.2112	7	1933	CD44,CITED2,AKT1,ADIPOR1,MAPK3,CALM1,INSR
GO: Molecular Function	GO:0016772	transferase activity, transferring phosphorus-containing groups	0.005312	1	0.03506	0.2158	5	1006	AKT1,MAPK3,CALM1,FGF18,INSR
GO: Molecular Function	GO:0005111	type 2 fibroblast growth factor receptor binding	0.005832	1	0.03581	0.2204	1	5	FGF18
GO: Molecular Function	GO:0015272	ATP-activated inward rectifier potassium channel activity	0.005832	1	0.03581	0.2204	1	5	KCNJ11
GO: Molecular Function	GO:0005105	type 1 fibroblast growth factor receptor binding	0.005832	1	0.03581	0.2204	1	5	FGF18
GO: Molecular Function	GO:0004672	protein kinase activity	0.006248	1	0.03743	0.2304	4	649	AKT1,MAPK3,FGF18,INSR
GO: Molecular Function	GO:0019955	cytokine binding	0.006381	1	0.03743	0.2304	2	103	CD44,TNFRSF11A
GO: Molecular Function	GO:0043559	insulin binding	0.006995	1	0.04014	0.2471	1	6	INSR
GO: Molecular Function	GO:0016174	NAD(P)H oxidase activity	0.008156	1	0.04581	0.282	1	7	NOX4
GO: Molecular Function	GO:0004415	hyalurononglucosaminidase activity	0.009316	1	0.0464	0.2856	1	8	CD44
GO: Molecular Function	GO:0005113	patched binding	0.009316	1	0.0464	0.2856	1	8	IHH
GO: Molecular Function	GO:0005499	vitamin D binding	0.009316	1	0.0464	0.2856	1	8	VDR
GO: Molecular Function	GO:0005114	type II transforming growth factor beta receptor binding	0.009316	1	0.0464	0.2856	1	8	CD44
GO: Molecular Function	GO:0031995	insulin-like growth factor II binding	0.009316	1	0.0464	0.2856	1	8	INSR
GO: Molecular Function	GO:0072542	protein phosphatase activator activity	0.009316	1	0.0464	0.2856	1	8	CALM1
GO: Molecular Function	GO:0044325	ion channel binding	0.0097	1	0.04742	0.2919	2	128	CALM1,KCNJ11
GO: Molecular Function	GO:0035256	G-protein coupled glutamate receptor binding	0.01047	1	0.04938	0.3039	1	9	CALM1
GO: Molecular Function	GO:0032052	bile acid binding	0.01047	1	0.04938	0.3039	1	9	VDR
GO: Biological Process	GO:0001501	skeletal system development	1.508e-10	3.153e-07	3.153e-07	2.593e-06	10	534	CD44,CITED2,NPR3,COL10A1,MAPK3,IHH,GPR68,PTHLH,FGF18,VDR
GO: Biological Process	GO:0042592	homeostatic process	6.541e-10	1.368e-06	6.838e-07	5.623e-06	14	1773	CD44,CITED2,NOX4,AKT1,ADIPOR1,TNFRSF11A,MAPK3,IHH,CALM1,GPR68,PTHLH,KCNJ11,INSR,VDR
GO: Biological Process	GO:0023056	positive regulation of signaling	4.516e-09	9.443e-06	2.218e-06	1.824e-05	13	1662	CD44,CITED2,IL11,NOX4,AKT1,ADIPOR1,TNFRSF11A,MAPK3,IHH,CALM1,GPR68,FGF18,INSR
GO: Biological Process	GO:0042127	regulation of cell proliferation	4.932e-09	1.031e-05	2.218e-06	1.824e-05	13	1674	CD44,IL11,NOX4,AKT1,NPR3,TNFRSF11A,IHH,NACC1,PTHLH,FGF18,FOSL2,INSR,VDR
GO: Biological Process	GO:0010647	positive regulation of cell communication	5.305e-09	1.109e-05	2.218e-06	1.824e-05	13	1684	CD44,CITED2,IL11,NOX4,AKT1,ADIPOR1,TNFRSF11A,MAPK3,IHH,CALM1,GPR68,FGF18,INSR
GO: Biological Process	GO:0009719	response to endogenous stimulus	8.079e-09	1.689e-05	2.815e-06	2.315e-05	13	1743	CD44,CITED2,NOX4,AKT1,ADIPOR1,MAPK3,IHH,CALM1,FGF18,FOSL2,KCNJ11,INSR,VDR
GO: Biological Process	GO:0009967	positive regulation of signal transduction	1.786e-08	3.734e-05	5.334e-06	4.386e-05	12	1488	CD44,CITED2,IL11,NOX4,AKT1,ADIPOR1,TNFRSF11A,MAPK3,IHH,CALM1,FGF18,INSR
GO: Biological Process	GO:1901700	response to oxygen-containing compound	4.477e-08	9.361e-05	1.17e-05	9.622e-05	12	1615	NOX4,AKT1,ADIPOR1,TNFRSF11A,MAPK3,IHH,CALM1,GPR68,FOSL2,KCNJ11,INSR,VDR
GO: Biological Process	GO:0071902	positive regulation of protein serine/threonine kinase activity	5.454e-08	0.000114	1.267e-05	0.0001042	7	321	NOX4,AKT1,TNFRSF11A,MAPK3,CALM1,FGF18,INSR
GO: Biological Process	GO:0048732	gland development	6.201e-08	0.0001297	1.297e-05	0.0001066	8	508	CD44,CITED2,AKT1,TNFRSF11A,MAPK3,PTHLH,INSR,VDR
GO: Biological Process	GO:0033993	response to lipid	7.864e-08	0.0001644	1.399e-05	0.000115	10	1024	CITED2,AKT1,TNFRSF11A,MAPK3,IHH,CALM1,FOSL2,KCNJ11,INSR,VDR
GO: Biological Process	GO:0051216	cartilage development	8.241e-08	0.0001723	1.399e-05	0.000115	6	198	CD44,COL10A1,MAPK3,IHH,PTHLH,FGF18
GO: Biological Process	GO:0009725	response to hormone	8.697e-08	0.0001819	1.399e-05	0.000115	10	1035	CITED2,AKT1,ADIPOR1,MAPK3,IHH,CALM1,FOSL2,KCNJ11,INSR,VDR
GO: Biological Process	GO:0014070	response to organic cyclic compound	9.693e-08	0.0002027	1.448e-05	0.000119	10	1047	CITED2,NOX4,AKT1,MAPK3,IHH,CALM1,FOSL2,KCNJ11,INSR,VDR
GO: Biological Process	GO:0019220	regulation of phosphate metabolic process	1.167e-07	0.000244	1.626e-05	0.0001337	12	1760	CD44,IL11,NOX4,AKT1,NPR3,TNFRSF11A,MAPK3,CALM1,PTHLH,FGF18,BGN,INSR
GO: Biological Process	GO:0051174	regulation of phosphorus metabolic process	1.266e-07	0.0002647	1.654e-05	0.000136	12	1773	CD44,IL11,NOX4,AKT1,NPR3,TNFRSF11A,MAPK3,CALM1,PTHLH,FGF18,BGN,INSR
GO: Biological Process	GO:0045935	positive regulation of nucleobase-containing compound metabolic process	1.909e-07	0.0003991	2.073e-05	0.0001704	12	1840	CITED2,IL11,NOX4,AKT1,TNFRSF11A,MAPK3,IHH,CALM1,PTHLH,FOSL2,INSR,VDR
GO: Biological Process	GO:0010562	positive regulation of phosphorus metabolic process	1.934e-07	0.0004043	2.073e-05	0.0001704	10	1127	CD44,IL11,NOX4,AKT1,TNFRSF11A,MAPK3,CALM1,PTHLH,FGF18,INSR
GO: Biological Process	GO:0045937	positive regulation of phosphate metabolic process	1.934e-07	0.0004043	2.073e-05	0.0001704	10	1127	CD44,IL11,NOX4,AKT1,TNFRSF11A,MAPK3,CALM1,PTHLH,FGF18,INSR
GO: Biological Process	GO:0009887	animal organ morphogenesis	1.982e-07	0.0004145	2.073e-05	0.0001704	10	1130	CD44,CITED2,COL10A1,MAPK3,IHH,PTHLH,FGF18,ETV7,INSR,VDR
GO: Biological Process	GO:0001503	ossification	2.696e-07	0.0005637	2.684e-05	0.0002207	7	406	AKT1,COL10A1,TNFRSF11A,MAPK3,IHH,PTHLH,FGF18
GO: Biological Process	GO:0031328	positive regulation of cellular biosynthetic process	3.212e-07	0.0006717	3.053e-05	0.000251	12	1929	CITED2,IL11,NOX4,AKT1,TNFRSF11A,MAPK3,IHH,CALM1,PTHLH,FOSL2,INSR,VDR
GO: Biological Process	GO:0051353	positive regulation of oxidoreductase activity	3.4e-07	0.0007109	3.091e-05	0.0002541	4	51	AKT1,NPR3,CALM1,VDR
GO: Biological Process	GO:0051173	positive regulation of nitrogen compound metabolic process	3.68e-07	0.0007694	3.206e-05	0.0002636	12	1953	CITED2,IL11,NOX4,AKT1,TNFRSF11A,MAPK3,IHH,CALM1,PTHLH,FOSL2,INSR,VDR
GO: Biological Process	GO:0009891	positive regulation of biosynthetic process	3.98e-07	0.0008321	3.257e-05	0.0002678	12	1967	CITED2,IL11,NOX4,AKT1,TNFRSF11A,MAPK3,IHH,CALM1,PTHLH,FOSL2,INSR,VDR
GO: Biological Process	GO:0033500	carbohydrate homeostasis	4.205e-07	0.0008793	3.257e-05	0.0002678	6	261	NOX4,AKT1,ADIPOR1,GPR68,KCNJ11,INSR
GO: Biological Process	GO:0042593	glucose homeostasis	4.205e-07	0.0008793	3.257e-05	0.0002678	6	261	NOX4,AKT1,ADIPOR1,GPR68,KCNJ11,INSR
GO: Biological Process	GO:0008284	positive regulation of cell proliferation	4.642e-07	0.0009705	3.408e-05	0.0002802	9	927	IL11,AKT1,TNFRSF11A,IHH,NACC1,PTHLH,FGF18,FOSL2,INSR
GO: Biological Process	GO:0000165	MAPK cascade	4.727e-07	0.0009883	3.408e-05	0.0002802	9	929	CD44,IL11,NOX4,AKT1,TNFRSF11A,MAPK3,CALM1,FGF18,INSR
GO: Biological Process	GO:0061448	connective tissue development	4.911e-07	0.001027	3.423e-05	0.0002815	6	268	CD44,COL10A1,MAPK3,IHH,PTHLH,FGF18
GO: Biological Process	GO:1902533	positive regulation of intracellular signal transduction	6.124e-07	0.001281	3.935e-05	0.0003236	9	958	CD44,IL11,NOX4,ADIPOR1,TNFRSF11A,MAPK3,CALM1,FGF18,INSR
GO: Biological Process	GO:0001934	positive regulation of protein phosphorylation	6.233e-07	0.001303	3.935e-05	0.0003236	9	960	CD44,IL11,NOX4,AKT1,TNFRSF11A,MAPK3,CALM1,FGF18,INSR
GO: Biological Process	GO:0071495	cellular response to endogenous stimulus	6.318e-07	0.001321	3.935e-05	0.0003236	10	1280	CD44,CITED2,NOX4,AKT1,ADIPOR1,MAPK3,FGF18,KCNJ11,INSR,VDR
GO: Biological Process	GO:0023014	signal transduction by protein phosphorylation	6.398e-07	0.001338	3.935e-05	0.0003236	9	963	CD44,IL11,NOX4,AKT1,TNFRSF11A,MAPK3,CALM1,FGF18,INSR
GO: Biological Process	GO:0032768	regulation of monooxygenase activity	7.045e-07	0.001473	4.209e-05	0.0003461	4	61	AKT1,NPR3,CALM1,VDR
GO: Biological Process	GO:0042327	positive regulation of phosphorylation	9.081e-07	0.001899	5.275e-05	0.0004337	9	1004	CD44,IL11,NOX4,AKT1,TNFRSF11A,MAPK3,CALM1,FGF18,INSR
GO: Biological Process	GO:0045860	positive regulation of protein kinase activity	1.037e-06	0.002168	5.772e-05	0.0004747	7	496	NOX4,AKT1,TNFRSF11A,MAPK3,CALM1,FGF18,INSR
GO: Biological Process	GO:0043408	regulation of MAPK cascade	1.049e-06	0.002193	5.772e-05	0.0004747	8	736	CD44,IL11,NOX4,AKT1,TNFRSF11A,MAPK3,FGF18,INSR
GO: Biological Process	GO:0060135	maternal process involved in female pregnancy	1.094e-06	0.002287	5.863e-05	0.0004821	4	68	CITED2,AKT1,IHH,VDR
GO: Biological Process	GO:0071900	regulation of protein serine/threonine kinase activity	1.299e-06	0.002716	6.79e-05	0.0005583	7	513	NOX4,AKT1,TNFRSF11A,MAPK3,CALM1,FGF18,INSR
GO: Biological Process	GO:1902531	regulation of intracellular signal transduction	1.457e-06	0.003047	7.262e-05	0.0005971	11	1786	CD44,IL11,NOX4,AKT1,ADIPOR1,TNFRSF11A,MAPK3,CALM1,FGF18,BGN,INSR
GO: Biological Process	GO:0043410	positive regulation of MAPK cascade	1.459e-06	0.00305	7.262e-05	0.0005971	7	522	CD44,IL11,NOX4,TNFRSF11A,MAPK3,FGF18,INSR
GO: Biological Process	GO:0001932	regulation of protein phosphorylation	1.5e-06	0.003136	7.292e-05	0.0005996	10	1406	CD44,IL11,NOX4,AKT1,TNFRSF11A,MAPK3,CALM1,FGF18,BGN,INSR
GO: Biological Process	GO:0045859	regulation of protein kinase activity	1.547e-06	0.003234	7.351e-05	0.0006045	8	775	NOX4,AKT1,TNFRSF11A,MAPK3,CALM1,FGF18,BGN,INSR
GO: Biological Process	GO:0033674	positive regulation of kinase activity	1.614e-06	0.003375	7.501e-05	0.0006168	7	530	NOX4,AKT1,TNFRSF11A,MAPK3,CALM1,FGF18,INSR
GO: Biological Process	GO:0051000	positive regulation of nitric-oxide synthase activity	2.116e-06	0.004425	9.62e-05	0.000791	3	22	AKT1,NPR3,CALM1
GO: Biological Process	GO:0070374	positive regulation of ERK1 and ERK2 cascade	2.3e-06	0.004809	0.0001023	0.0008413	5	190	CD44,NOX4,TNFRSF11A,MAPK3,FGF18
GO: Biological Process	GO:0034097	response to cytokine	2.47e-06	0.005166	0.0001076	0.0008849	8	825	CD44,AKT1,ADIPOR1,TNFRSF11A,MAPK3,KCNJ11,BGN,INSR
GO: Biological Process	GO:0048878	chemical homeostasis	2.581e-06	0.005396	0.0001092	0.0008983	9	1138	NOX4,AKT1,ADIPOR1,CALM1,GPR68,PTHLH,KCNJ11,INSR,VDR
GO: Biological Process	GO:0060348	bone development	2.612e-06	0.005462	0.0001092	0.0008983	5	195	CITED2,COL10A1,GPR68,PTHLH,FGF18
GO: Biological Process	GO:0048545	response to steroid hormone	2.872e-06	0.006004	0.0001149	0.0009444	7	578	CITED2,IHH,CALM1,FOSL2,KCNJ11,INSR,VDR
GO: Biological Process	GO:0043549	regulation of kinase activity	2.877e-06	0.006015	0.0001149	0.0009444	8	842	NOX4,AKT1,TNFRSF11A,MAPK3,CALM1,FGF18,BGN,INSR
GO: Biological Process	GO:0042325	regulation of phosphorylation	2.911e-06	0.006087	0.0001149	0.0009444	10	1512	CD44,IL11,NOX4,AKT1,TNFRSF11A,MAPK3,CALM1,FGF18,BGN,INSR
GO: Biological Process	GO:0060349	bone morphogenesis	4.014e-06	0.008393	0.0001554	0.001278	4	94	CITED2,COL10A1,PTHLH,FGF18
GO: Biological Process	GO:0007565	female pregnancy	4.407e-06	0.009216	0.0001676	0.001378	5	217	CITED2,AKT1,IHH,PTHLH,VDR
GO: Biological Process	GO:0051341	regulation of oxidoreductase activity	4.55e-06	0.009514	0.0001699	0.001397	4	97	AKT1,NPR3,CALM1,VDR
GO: Biological Process	GO:0097305	response to alcohol	4.875e-06	0.01019	0.000177	0.001456	6	398	IHH,CALM1,FOSL2,KCNJ11,INSR,VDR
GO: Biological Process	GO:0031401	positive regulation of protein modification process	4.936e-06	0.01032	0.000177	0.001456	9	1231	CD44,IL11,NOX4,AKT1,TNFRSF11A,MAPK3,CALM1,FGF18,INSR
GO: Biological Process	GO:0032770	positive regulation of monooxygenase activity	4.995e-06	0.01044	0.000177	0.001456	3	29	AKT1,NPR3,CALM1
GO: Biological Process	GO:0071363	cellular response to growth factor stimulus	5.801e-06	0.01213	0.0002022	0.001662	7	643	CD44,CITED2,NOX4,AKT1,MAPK3,FGF18,INSR
GO: Biological Process	GO:0043406	positive regulation of MAP kinase activity	6.105e-06	0.01277	0.0002036	0.001674	5	232	NOX4,TNFRSF11A,MAPK3,FGF18,INSR
GO: Biological Process	GO:0036075	replacement ossification	6.135e-06	0.01283	0.0002036	0.001674	3	31	COL10A1,PTHLH,FGF18
GO: Biological Process	GO:0001958	endochondral ossification	6.135e-06	0.01283	0.0002036	0.001674	3	31	COL10A1,PTHLH,FGF18
GO: Biological Process	GO:0043627	response to estrogen	6.366e-06	0.01331	0.000208	0.00171	5	234	CITED2,IHH,FOSL2,KCNJ11,INSR
GO: Biological Process	GO:0051347	positive regulation of transferase activity	7.235e-06	0.01513	0.0002327	0.001914	7	665	NOX4,AKT1,TNFRSF11A,MAPK3,CALM1,FGF18,INSR
GO: Biological Process	GO:0032846	positive regulation of homeostatic process	7.496e-06	0.01567	0.0002375	0.001953	5	242	CD44,TNFRSF11A,MAPK3,CALM1,GPR68
GO: Biological Process	GO:0070848	response to growth factor	7.749e-06	0.0162	0.0002418	0.001989	7	672	CD44,CITED2,NOX4,AKT1,MAPK3,FGF18,INSR
GO: Biological Process	GO:0044706	multi-multicellular organism process	8.778e-06	0.01835	0.0002699	0.002219	5	250	CITED2,AKT1,IHH,PTHLH,VDR
GO: Biological Process	GO:0001893	maternal placenta development	8.906e-06	0.01862	0.0002699	0.002219	3	35	CITED2,AKT1,VDR
GO: Biological Process	GO:0035295	tube development	9.567e-06	0.02	0.0002858	0.00235	7	694	CD44,CITED2,MAPK3,IHH,PTHLH,FGF18,VDR
GO: Biological Process	GO:1901701	cellular response to oxygen-containing compound	1.042e-05	0.02179	0.0003069	0.002523	8	1002	NOX4,AKT1,ADIPOR1,MAPK3,GPR68,KCNJ11,INSR,VDR
GO: Biological Process	GO:0051338	regulation of transferase activity	1.073e-05	0.02243	0.0003116	0.002562	8	1006	NOX4,AKT1,TNFRSF11A,MAPK3,CALM1,FGF18,BGN,INSR
GO: Biological Process	GO:0071345	cellular response to cytokine stimulus	1.141e-05	0.02386	0.0003268	0.002688	7	713	CD44,AKT1,ADIPOR1,TNFRSF11A,MAPK3,KCNJ11,BGN
GO: Biological Process	GO:0044711	single-organism biosynthetic process	1.233e-05	0.02579	0.0003485	0.002865	10	1775	AKT1,NPR3,MAPK3,IHH,CALM1,PTHLH,FGF18,BGN,INSR,VDR
GO: Biological Process	GO:0070372	regulation of ERK1 and ERK2 cascade	1.274e-05	0.02664	0.0003552	0.002921	5	270	CD44,NOX4,TNFRSF11A,MAPK3,FGF18
GO: Biological Process	GO:0010557	positive regulation of macromolecule biosynthetic process	1.296e-05	0.02711	0.0003567	0.002933	10	1785	CITED2,IL11,NOX4,AKT1,TNFRSF11A,MAPK3,IHH,FOSL2,INSR,VDR
GO: Biological Process	GO:0018209	peptidyl-serine modification	1.467e-05	0.03068	0.0003984	0.003276	5	278	CD44,IL11,AKT1,MAPK3,BGN
GO: Biological Process	GO:0070371	ERK1 and ERK2 cascade	1.654e-05	0.03458	0.0004434	0.003646	5	285	CD44,NOX4,TNFRSF11A,MAPK3,FGF18
GO: Biological Process	GO:0031399	regulation of protein modification process	1.756e-05	0.03671	0.0004647	0.003821	10	1847	CD44,IL11,NOX4,AKT1,TNFRSF11A,MAPK3,CALM1,FGF18,BGN,INSR
GO: Biological Process	GO:0035270	endocrine system development	2.176e-05	0.0455	0.0005647	0.004643	4	144	CITED2,AKT1,MAPK3,INSR
GO: Biological Process	GO:0071417	cellular response to organonitrogen compound	2.187e-05	0.04574	0.0005647	0.004643	6	518	NOX4,AKT1,ADIPOR1,MAPK3,KCNJ11,INSR
GO: Biological Process	GO:0044093	positive regulation of molecular function	2.244e-05	0.04692	0.0005706	0.004692	10	1899	NOX4,AKT1,NPR3,TNFRSF11A,MAPK3,CALM1,FGF18,KCNJ11,INSR,VDR
GO: Biological Process	GO:0010628	positive regulation of gene expression	2.265e-05	0.04736	0.0005706	0.004692	10	1901	CD44,CITED2,IL11,AKT1,TNFRSF11A,MAPK3,IHH,FOSL2,INSR,VDR
GO: Biological Process	GO:0071214	cellular response to abiotic stimulus	2.44e-05	0.05102	0.0006074	0.004994	5	309	NOX4,AKT1,MAPK3,CALM1,GPR68
GO: Biological Process	GO:0032330	regulation of chondrocyte differentiation	2.48e-05	0.05187	0.0006102	0.005018	3	49	IHH,PTHLH,FGF18
GO: Biological Process	GO:0002521	leukocyte differentiation	2.624e-05	0.05487	0.0006298	0.005179	6	535	CD44,CITED2,IL11,TNFRSF11A,IHH,GPR68
GO: Biological Process	GO:0050999	regulation of nitric-oxide synthase activity	2.637e-05	0.05514	0.0006298	0.005179	3	50	AKT1,NPR3,CALM1
GO: Biological Process	GO:0032270	positive regulation of cellular protein metabolic process	2.651e-05	0.05542	0.0006298	0.005179	9	1514	CD44,IL11,NOX4,AKT1,TNFRSF11A,MAPK3,CALM1,FGF18,INSR
GO: Biological Process	GO:0032355	response to estradiol	2.691e-05	0.05626	0.0006322	0.005198	4	152	IHH,FOSL2,KCNJ11,INSR
GO: Biological Process	GO:0030879	mammary gland development	2.761e-05	0.05773	0.0006414	0.005274	4	153	AKT1,TNFRSF11A,PTHLH,VDR
GO: Biological Process	GO:0006468	protein phosphorylation	2.885e-05	0.06033	0.000663	0.005452	10	1954	CD44,IL11,NOX4,AKT1,TNFRSF11A,MAPK3,CALM1,FGF18,BGN,INSR
GO: Biological Process	GO:0045893	positive regulation of transcription, DNA-templated	2.96e-05	0.06189	0.0006655	0.005472	9	1535	CITED2,IL11,AKT1,TNFRSF11A,MAPK3,IHH,FOSL2,INSR,VDR
GO: Biological Process	GO:1903508	positive regulation of nucleic acid-templated transcription	2.96e-05	0.06189	0.0006655	0.005472	9	1535	CITED2,IL11,AKT1,TNFRSF11A,MAPK3,IHH,FOSL2,INSR,VDR
GO: Biological Process	GO:0044092	negative regulation of molecular function	3.025e-05	0.06326	0.000673	0.005534	8	1160	CD44,AKT1,NPR3,MAPK3,CALM1,PTHLH,BGN,INSR
GO: Biological Process	GO:1902680	positive regulation of RNA biosynthetic process	3.249e-05	0.06794	0.0007151	0.00588	9	1553	CITED2,IL11,AKT1,TNFRSF11A,MAPK3,IHH,FOSL2,INSR,VDR
GO: Biological Process	GO:0060350	endochondral bone morphogenesis	3.516e-05	0.07352	0.0007658	0.006297	3	55	COL10A1,PTHLH,FGF18
GO: Biological Process	GO:0043085	positive regulation of catalytic activity	3.881e-05	0.08115	0.0008366	0.00688	9	1588	NOX4,AKT1,NPR3,TNFRSF11A,MAPK3,CALM1,FGF18,INSR,VDR
GO: Biological Process	GO:0008544	epidermis development	4.02e-05	0.08406	0.0008526	0.007011	5	343	AKT1,PTHLH,FOSL2,INSR,VDR
GO: Biological Process	GO:0010243	response to organonitrogen compound	4.037e-05	0.08441	0.0008526	0.007011	7	867	NOX4,AKT1,ADIPOR1,MAPK3,CALM1,KCNJ11,INSR
GO: Biological Process	GO:0051254	positive regulation of RNA metabolic process	4.141e-05	0.0866	0.000866	0.007121	9	1601	CITED2,IL11,AKT1,TNFRSF11A,MAPK3,IHH,FOSL2,INSR,VDR
GO: Biological Process	GO:0009628	response to abiotic stimulus	4.324e-05	0.09041	0.0008952	0.007361	8	1219	CITED2,NOX4,AKT1,TNFRSF11A,MAPK3,CALM1,GPR68,FOSL2
GO: Biological Process	GO:0051247	positive regulation of protein metabolic process	4.395e-05	0.09189	0.0009009	0.007408	9	1613	CD44,IL11,NOX4,AKT1,TNFRSF11A,MAPK3,CALM1,FGF18,INSR
GO: Biological Process	GO:0007267	cell-cell signaling	4.748e-05	0.09927	0.0009638	0.007925	8	1235	IL11,AKT1,TNFRSF11A,IHH,GPR68,PTHLH,FGF18,KCNJ11
GO: Biological Process	GO:0043405	regulation of MAP kinase activity	4.799e-05	0.1004	0.0009649	0.007935	5	356	NOX4,TNFRSF11A,MAPK3,FGF18,INSR
GO: Biological Process	GO:1901699	cellular response to nitrogen compound	4.898e-05	0.1024	0.0009754	0.008021	6	598	NOX4,AKT1,ADIPOR1,MAPK3,KCNJ11,INSR
GO: Biological Process	GO:0018193	peptidyl-amino acid modification	5.03e-05	0.1052	0.0009922	0.008159	8	1245	CD44,IL11,AKT1,MAPK3,CALM1,FGF18,BGN,INSR
GO: Biological Process	GO:0048534	hematopoietic or lymphoid organ development	5.308e-05	0.111	0.001037	0.00853	7	905	CD44,CITED2,IL11,TNFRSF11A,MAPK3,IHH,GPR68
GO: Biological Process	GO:0048771	tissue remodeling	5.558e-05	0.1162	0.001076	0.008848	4	183	NOX4,IHH,BGN,VDR
GO: Biological Process	GO:0048754	branching morphogenesis of an epithelial tube	5.798e-05	0.1212	0.001112	0.009146	4	185	CD44,CITED2,IHH,VDR
GO: Biological Process	GO:0061308	cardiac neural crest cell development involved in heart development	5.859e-05	0.1225	0.001114	0.009157	2	10	CITED2,MAPK3
GO: Biological Process	GO:0061035	regulation of cartilage development	6.082e-05	0.1272	0.001146	0.009421	3	66	IHH,PTHLH,FGF18
GO: Biological Process	GO:0060562	epithelial tube morphogenesis	6.144e-05	0.1285	0.001147	0.009432	5	375	CD44,CITED2,IHH,PTHLH,VDR
GO: Biological Process	GO:0018108	peptidyl-tyrosine phosphorylation	6.959e-05	0.1455	0.001285	0.01057	5	385	CD44,IL11,MAPK3,FGF18,INSR
GO: Biological Process	GO:0060429	epithelium development	7.114e-05	0.1487	0.001285	0.01057	8	1307	CD44,CITED2,AKT1,IHH,PTHLH,FOSL2,INSR,VDR
GO: Biological Process	GO:0018212	peptidyl-tyrosine modification	7.132e-05	0.1491	0.001285	0.01057	5	387	CD44,IL11,MAPK3,FGF18,INSR
GO: Biological Process	GO:0061307	cardiac neural crest cell differentiation involved in heart development	7.155e-05	0.1496	0.001285	0.01057	2	11	CITED2,MAPK3
GO: Biological Process	GO:1901135	carbohydrate derivative metabolic process	7.191e-05	0.1504	0.001285	0.01057	8	1309	CD44,AKT1,NPR3,IHH,CALM1,PTHLH,BGN,INSR
GO: Biological Process	GO:0002520	immune system development	7.519e-05	0.1572	0.001332	0.01096	7	956	CD44,CITED2,IL11,TNFRSF11A,MAPK3,IHH,GPR68
GO: Biological Process	GO:1901654	response to ketone	8.001e-05	0.1673	0.001406	0.01156	4	201	AKT1,CALM1,KCNJ11,INSR
GO: Biological Process	GO:0051054	positive regulation of DNA metabolic process	8.314e-05	0.1738	0.001449	0.01191	4	203	NOX4,AKT1,MAPK3,INSR
GO: Biological Process	GO:1901698	response to nitrogen compound	8.909e-05	0.1863	0.00154	0.01266	7	982	NOX4,AKT1,ADIPOR1,MAPK3,CALM1,KCNJ11,INSR
GO: Biological Process	GO:0048015	phosphatidylinositol-mediated signaling	9.306e-05	0.1946	0.001595	0.01312	4	209	AKT1,NPR3,MAPK3,FGF18
GO: Biological Process	GO:0048017	inositol lipid-mediated signaling	9.834e-05	0.2056	0.001672	0.01375	4	212	AKT1,NPR3,MAPK3,FGF18
GO: Biological Process	GO:0035239	tube morphogenesis	0.0001014	0.2121	0.001711	0.01407	5	417	CD44,CITED2,IHH,PTHLH,VDR
GO: Biological Process	GO:0061180	mammary gland epithelium development	0.000108	0.2259	0.001807	0.01486	3	80	AKT1,PTHLH,VDR
GO: Biological Process	GO:0061138	morphogenesis of a branching epithelium	0.0001175	0.2457	0.00195	0.01603	4	222	CD44,CITED2,IHH,VDR
GO: Biological Process	GO:1900542	regulation of purine nucleotide metabolic process	0.0001302	0.2723	0.002144	0.01763	4	228	NPR3,CALM1,PTHLH,INSR
GO: Biological Process	GO:0006006	glucose metabolic process	0.0001324	0.2769	0.002163	0.01779	4	229	AKT1,ADIPOR1,KCNJ11,INSR
GO: Biological Process	GO:0008285	negative regulation of cell proliferation	0.0001348	0.2818	0.002184	0.01796	6	718	CD44,NOX4,NPR3,IHH,PTHLH,VDR
GO: Biological Process	GO:0045725	positive regulation of glycogen biosynthetic process	0.0001362	0.2848	0.002191	0.01802	2	15	AKT1,INSR
GO: Biological Process	GO:0072359	circulatory system development	0.0001457	0.3046	0.002286	0.0188	7	1062	CITED2,NOX4,AKT1,MAPK3,IHH,FGF18,INSR
GO: Biological Process	GO:0072358	cardiovascular system development	0.0001457	0.3046	0.002286	0.0188	7	1062	CITED2,NOX4,AKT1,MAPK3,IHH,FGF18,INSR
GO: Biological Process	GO:0048705	skeletal system morphogenesis	0.0001463	0.3059	0.002286	0.0188	4	235	CITED2,COL10A1,PTHLH,FGF18
GO: Biological Process	GO:0031279	regulation of cyclase activity	0.0001483	0.3101	0.002286	0.0188	3	89	NPR3,MAPK3,CALM1
GO: Biological Process	GO:0005977	glycogen metabolic process	0.0001483	0.3101	0.002286	0.0188	3	89	AKT1,CALM1,INSR
GO: Biological Process	GO:0006140	regulation of nucleotide metabolic process	0.0001487	0.3109	0.002286	0.0188	4	236	NPR3,CALM1,PTHLH,INSR
GO: Biological Process	GO:0006073	cellular glucan metabolic process	0.0001533	0.3206	0.002305	0.01895	3	90	AKT1,CALM1,INSR
GO: Biological Process	GO:0044042	glucan metabolic process	0.0001533	0.3206	0.002305	0.01895	3	90	AKT1,CALM1,INSR
GO: Biological Process	GO:0001763	morphogenesis of a branching structure	0.0001536	0.3212	0.002305	0.01895	4	238	CD44,CITED2,IHH,VDR
GO: Biological Process	GO:0003006	developmental process involved in reproduction	0.0001543	0.3227	0.002305	0.01895	6	736	CD44,CITED2,AKT1,IHH,INSR,VDR
GO: Biological Process	GO:2000026	regulation of multicellular organismal development	0.0001594	0.3333	0.002364	0.01944	9	1901	CD44,CITED2,AKT1,IHH,GPR68,PTHLH,FGF18,INSR,VDR
GO: Biological Process	GO:0031016	pancreas development	0.0001636	0.3422	0.002393	0.01968	3	92	AKT1,IHH,INSR
GO: Biological Process	GO:1902106	negative regulation of leukocyte differentiation	0.0001636	0.3422	0.002393	0.01968	3	92	CD44,IHH,GPR68
GO: Biological Process	GO:0046777	protein autophosphorylation	0.0001717	0.359	0.002493	0.0205	4	245	AKT1,MAPK3,CALM1,INSR
GO: Biological Process	GO:0033138	positive regulation of peptidyl-serine phosphorylation	0.00018	0.3763	0.002583	0.02124	3	95	CD44,IL11,AKT1
GO: Biological Process	GO:0045944	positive regulation of transcription from RNA polymerase II promoter	0.0001804	0.3771	0.002583	0.02124	7	1099	CITED2,IL11,AKT1,MAPK3,IHH,FOSL2,VDR
GO: Biological Process	GO:0006915	apoptotic process	0.0001821	0.3807	0.00259	0.0213	9	1934	CD44,CITED2,IL11,NOX4,AKT1,TNFRSF11A,MAPK3,IHH,VDR
GO: Biological Process	GO:0070875	positive regulation of glycogen metabolic process	0.0001981	0.4141	0.002798	0.02301	2	18	AKT1,INSR
GO: Biological Process	GO:0012501	programmed cell death	0.0002042	0.427	0.002866	0.02356	9	1963	CD44,CITED2,IL11,NOX4,AKT1,TNFRSF11A,MAPK3,IHH,VDR
GO: Biological Process	GO:2000379	positive regulation of reactive oxygen species metabolic process	0.0002157	0.451	0.002982	0.02452	3	101	NOX4,AKT1,INSR
GO: Biological Process	GO:0048608	reproductive structure development	0.0002157	0.4511	0.002982	0.02452	5	490	CD44,CITED2,AKT1,INSR,VDR
GO: Biological Process	GO:0042981	regulation of apoptotic process	0.0002172	0.4541	0.002982	0.02452	8	1532	CD44,CITED2,IL11,NOX4,AKT1,TNFRSF11A,IHH,VDR
GO: Biological Process	GO:0051049	regulation of transport	0.0002182	0.4562	0.002982	0.02452	9	1980	IL11,AKT1,TNFRSF11A,MAPK3,CALM1,GPR68,KCNJ11,INSR,VDR
GO: Biological Process	GO:0061458	reproductive system development	0.000224	0.4685	0.003042	0.02501	5	494	CD44,CITED2,AKT1,INSR,VDR
GO: Biological Process	GO:0032844	regulation of homeostatic process	0.0002283	0.4773	0.003044	0.02503	5	496	CD44,TNFRSF11A,MAPK3,CALM1,GPR68
GO: Biological Process	GO:0018105	peptidyl-serine phosphorylation	0.0002285	0.4778	0.003044	0.02503	4	264	CD44,IL11,AKT1,MAPK3
GO: Biological Process	GO:0006112	energy reserve metabolic process	0.0002285	0.4779	0.003044	0.02503	3	103	AKT1,CALM1,INSR
GO: Biological Process	GO:0043067	regulation of programmed cell death	0.0002345	0.4902	0.003103	0.02551	8	1549	CD44,CITED2,IL11,NOX4,AKT1,TNFRSF11A,IHH,VDR
GO: Biological Process	GO:0019318	hexose metabolic process	0.0002386	0.4988	0.003137	0.0258	4	267	AKT1,ADIPOR1,KCNJ11,INSR
GO: Biological Process	GO:0002062	chondrocyte differentiation	0.0002487	0.5201	0.003251	0.02673	3	106	IHH,PTHLH,FGF18
GO: Biological Process	GO:0044264	cellular polysaccharide metabolic process	0.0002557	0.5347	0.003321	0.02731	3	107	AKT1,CALM1,INSR
GO: Biological Process	GO:0032332	positive regulation of chondrocyte differentiation	0.0002713	0.5672	0.003501	0.02879	2	21	IHH,FGF18
GO: Biological Process	GO:0022409	positive regulation of cell-cell adhesion	0.0002745	0.5739	0.003521	0.02895	4	277	CD44,CITED2,AKT1,IHH
GO: Biological Process	GO:0043270	positive regulation of ion transport	0.0003018	0.6311	0.00383	0.0315	4	284	AKT1,TNFRSF11A,CALM1,KCNJ11
GO: Biological Process	GO:0051051	negative regulation of transport	0.0003022	0.632	0.00383	0.0315	5	527	IL11,AKT1,CALM1,KCNJ11,INSR
GO: Biological Process	GO:1903510	mucopolysaccharide metabolic process	0.000341	0.7131	0.004296	0.03532	3	118	CD44,AKT1,BGN
GO: Biological Process	GO:0030097	hemopoiesis	0.0003546	0.7415	0.004428	0.03641	6	858	CD44,CITED2,IL11,TNFRSF11A,IHH,GPR68
GO: Biological Process	GO:0046697	decidualization	0.0003558	0.7439	0.004428	0.03641	2	24	CITED2,VDR
GO: Biological Process	GO:0046903	secretion	0.0003614	0.7556	0.004471	0.03677	7	1230	IL11,NPR3,TNFRSF11A,CALM1,GPR68,KCNJ11,VDR
GO: Biological Process	GO:0005976	polysaccharide metabolic process	0.0003671	0.7676	0.004515	0.03713	3	121	AKT1,CALM1,INSR
GO: Biological Process	GO:0030817	regulation of cAMP biosynthetic process	0.0003761	0.7864	0.004587	0.03772	3	122	NPR3,CALM1,PTHLH
GO: Biological Process	GO:0019221	cytokine-mediated signaling pathway	0.0003773	0.789	0.004587	0.03772	5	553	CD44,ADIPOR1,TNFRSF11A,MAPK3,BGN
GO: Biological Process	GO:0010941	regulation of cell death	0.0003823	0.7993	0.00462	0.03799	8	1663	CD44,CITED2,IL11,NOX4,AKT1,TNFRSF11A,IHH,VDR
GO: Biological Process	GO:0007530	sex determination	0.0003864	0.808	0.004644	0.03819	2	25	CITED2,INSR
GO: Biological Process	GO:0010906	regulation of glucose metabolic process	0.0004038	0.8444	0.004825	0.03968	3	125	AKT1,ADIPOR1,INSR
GO: Biological Process	GO:0033135	regulation of peptidyl-serine phosphorylation	0.000423	0.8846	0.004998	0.0411	3	127	CD44,IL11,AKT1
GO: Biological Process	GO:0008286	insulin receptor signaling pathway	0.000423	0.8846	0.004998	0.0411	3	127	AKT1,ADIPOR1,INSR
GO: Biological Process	GO:0006171	cAMP biosynthetic process	0.0004329	0.9051	0.005069	0.04168	3	128	NPR3,CALM1,PTHLH
GO: Biological Process	GO:0005996	monosaccharide metabolic process	0.0004363	0.9124	0.005069	0.04168	4	313	AKT1,ADIPOR1,KCNJ11,INSR
GO: Biological Process	GO:0001666	response to hypoxia	0.0004363	0.9124	0.005069	0.04168	4	313	CITED2,NOX4,AKT1,FOSL2
GO: Biological Process	GO:0044262	cellular carbohydrate metabolic process	0.0004743	0.9918	0.00548	0.04506	4	320	AKT1,ADIPOR1,CALM1,INSR
GO: Biological Process	GO:0036293	response to decreased oxygen levels	0.0004856	1	0.005579	0.04588	4	322	CITED2,NOX4,AKT1,FOSL2
GO: Biological Process	GO:0007186	G-protein coupled receptor signaling pathway	0.0004946	1	0.005651	0.04647	7	1295	AKT1,NPR3,ADIPOR1,CALM1,GPR68,PTHLH,INSR
GO: Biological Process	GO:0071375	cellular response to peptide hormone stimulus	0.0005029	1	0.005715	0.04699	4	325	AKT1,ADIPOR1,MAPK3,INSR
GO: Biological Process	GO:0050678	regulation of epithelial cell proliferation	0.0005087	1	0.005739	0.04719	4	326	AKT1,IHH,FGF18,VDR
GO: Biological Process	GO:0016477	cell migration	0.000511	1	0.005739	0.04719	7	1302	CD44,CITED2,NOX4,AKT1,TNFRSF11A,FGF18,INSR
GO: Biological Process	GO:0044344	cellular response to fibroblast growth factor stimulus	0.0005168	1	0.005739	0.04719	3	136	CD44,MAPK3,FGF18
GO: Biological Process	GO:0071333	cellular response to glucose stimulus	0.0005168	1	0.005739	0.04719	3	136	NOX4,GPR68,KCNJ11
GO: Biological Process	GO:0040011	locomotion	0.0005203	1	0.005739	0.04719	8	1740	CD44,CITED2,NOX4,AKT1,TNFRSF11A,MAPK3,FGF18,INSR
GO: Biological Process	GO:0046636	negative regulation of alpha-beta T cell activation	0.0005215	1	0.005739	0.04719	2	29	CD44,IHH
GO: Biological Process	GO:0007507	heart development	0.0005316	1	0.00582	0.04786	5	596	CITED2,NOX4,MAPK3,IHH,INSR
GO: Biological Process	GO:0071331	cellular response to hexose stimulus	0.0005393	1	0.005873	0.04829	3	138	NOX4,GPR68,KCNJ11
GO: Biological Process	GO:0023057	negative regulation of signaling	0.0005477	1	0.005891	0.04844	7	1317	CD44,IL11,AKT1,IHH,CALM1,KCNJ11,BGN
GO: Biological Process	GO:0071326	cellular response to monosaccharide stimulus	0.0005508	1	0.005891	0.04844	3	139	NOX4,GPR68,KCNJ11
GO: Biological Process	GO:0030325	adrenal gland development	0.0005583	1	0.005891	0.04844	2	30	CITED2,INSR
GO: Biological Process	GO:0005979	regulation of glycogen biosynthetic process	0.0005583	1	0.005891	0.04844	2	30	AKT1,INSR
GO: Biological Process	GO:0010962	regulation of glucan biosynthetic process	0.0005583	1	0.005891	0.04844	2	30	AKT1,INSR
GO: Biological Process	GO:0010563	negative regulation of phosphorus metabolic process	0.0005607	1	0.005891	0.04844	5	603	AKT1,NPR3,CALM1,BGN,INSR
GO: Biological Process	GO:0045936	negative regulation of phosphate metabolic process	0.0005607	1	0.005891	0.04844	5	603	AKT1,NPR3,CALM1,BGN,INSR
GO: Biological Process	GO:1900544	positive regulation of purine nucleotide metabolic process	0.0005742	1	0.005929	0.04875	3	141	CALM1,PTHLH,INSR
GO: Biological Process	GO:0045981	positive regulation of nucleotide metabolic process	0.0005742	1	0.005929	0.04875	3	141	CALM1,PTHLH,INSR
GO: Biological Process	GO:0030814	regulation of cAMP metabolic process	0.0005742	1	0.005929	0.04875	3	141	NPR3,CALM1,PTHLH
GO: Biological Process	GO:0051094	positive regulation of developmental process	0.0005786	1	0.005929	0.04875	7	1329	CITED2,AKT1,IHH,GPR68,FGF18,INSR,VDR
GO: Biological Process	GO:0030802	regulation of cyclic nucleotide biosynthetic process	0.0005861	1	0.005929	0.04875	3	142	NPR3,CALM1,PTHLH
GO: Biological Process	GO:0071774	response to fibroblast growth factor	0.0005861	1	0.005929	0.04875	3	142	CD44,MAPK3,FGF18
GO: Biological Process	GO:0070482	response to oxygen levels	0.0005894	1	0.005929	0.04875	4	339	CITED2,NOX4,AKT1,FOSL2
GO: Biological Process	GO:0010648	negative regulation of cell communication	0.0005919	1	0.005929	0.04875	7	1334	CD44,IL11,AKT1,IHH,CALM1,KCNJ11,BGN
GO: Biological Process	GO:0048596	embryonic camera-type eye morphogenesis	0.0005964	1	0.005929	0.04875	2	31	CITED2,IHH
GO: Biological Process	GO:2000191	regulation of fatty acid transport	0.0005964	1	0.005929	0.04875	2	31	AKT1,TNFRSF11A
GO: Biological Process	GO:0061036	positive regulation of cartilage development	0.0005964	1	0.005929	0.04875	2	31	IHH,FGF18
GO: Biological Process	GO:1903707	negative regulation of hemopoiesis	0.0005982	1	0.005929	0.04875	3	143	CD44,IHH,GPR68
GO: Biological Process	GO:1901653	cellular response to peptide	0.0006025	1	0.005932	0.04878	4	341	AKT1,ADIPOR1,MAPK3,INSR
GO: Biological Process	GO:0002009	morphogenesis of an epithelium	0.0006043	1	0.005932	0.04878	5	613	CD44,CITED2,IHH,PTHLH,VDR
GO: Biological Process	GO:0032787	monocarboxylic acid metabolic process	0.000627	1	0.006126	0.05038	5	618	AKT1,ADIPOR1,MAPK3,BGN,INSR
GO: Biological Process	GO:0035051	cardiocyte differentiation	0.0006355	1	0.006154	0.05061	3	146	CITED2,NOX4,MAPK3
GO: Biological Process	GO:0070849	response to epidermal growth factor	0.0006357	1	0.006154	0.05061	2	32	AKT1,MAPK3
GO: Biological Process	GO:0071322	cellular response to carbohydrate stimulus	0.0006743	1	0.006497	0.05342	3	149	NOX4,GPR68,KCNJ11
GO: Biological Process	GO:0014066	regulation of phosphatidylinositol 3-kinase signaling	0.0006875	1	0.006594	0.05422	3	150	AKT1,MAPK3,FGF18
GO: Biological Process	GO:0030198	extracellular matrix organization	0.0006933	1	0.006619	0.05443	4	354	CD44,COL10A1,IHH,BGN
GO: Biological Process	GO:0043062	extracellular structure organization	0.0007006	1	0.006632	0.05453	4	355	CD44,COL10A1,IHH,BGN
GO: Biological Process	GO:1900371	regulation of purine nucleotide biosynthetic process	0.0007009	1	0.006632	0.05453	3	151	NPR3,CALM1,PTHLH
GO: Biological Process	GO:0030808	regulation of nucleotide biosynthetic process	0.0007145	1	0.00673	0.05534	3	152	NPR3,CALM1,PTHLH
GO: Biological Process	GO:0045581	negative regulation of T cell differentiation	0.000718	1	0.006733	0.05536	2	34	CD44,IHH
GO: Biological Process	GO:0022612	gland morphogenesis	0.0007421	1	0.006928	0.05696	3	154	CD44,PTHLH,VDR
GO: Biological Process	GO:0052652	cyclic purine nucleotide metabolic process	0.0007848	1	0.007294	0.05998	3	157	NPR3,CALM1,PTHLH
GO: Biological Process	GO:0009190	cyclic nucleotide biosynthetic process	0.0007994	1	0.007364	0.06055	3	158	NPR3,CALM1,PTHLH
GO: Biological Process	GO:0001678	cellular glucose homeostasis	0.0007994	1	0.007364	0.06055	3	158	NOX4,GPR68,KCNJ11
GO: Biological Process	GO:0051052	regulation of DNA metabolic process	0.0008179	1	0.007501	0.06168	4	370	NOX4,AKT1,MAPK3,INSR
GO: Biological Process	GO:0019752	carboxylic acid metabolic process	0.0008265	1	0.007547	0.06206	6	1006	NOX4,AKT1,ADIPOR1,MAPK3,BGN,INSR
GO: Biological Process	GO:0043491	protein kinase B signaling	0.0008442	1	0.007634	0.06277	3	161	NOX4,AKT1,INSR
GO: Biological Process	GO:0034405	response to fluid shear stress	0.0008506	1	0.007634	0.06277	2	37	CITED2,AKT1
GO: Biological Process	GO:0070873	regulation of glycogen metabolic process	0.0008506	1	0.007634	0.06277	2	37	AKT1,INSR
GO: Biological Process	GO:0060416	response to growth hormone	0.0008506	1	0.007634	0.06277	2	37	AKT1,MAPK3
GO: Biological Process	GO:0046058	cAMP metabolic process	0.0008595	1	0.00768	0.06315	3	162	NPR3,CALM1,PTHLH
GO: Biological Process	GO:0007167	enzyme linked receptor protein signaling pathway	0.0008933	1	0.007882	0.06481	6	1021	CITED2,AKT1,ADIPOR1,MAPK3,FGF18,INSR
GO: Biological Process	GO:0032885	regulation of polysaccharide biosynthetic process	0.0008972	1	0.007882	0.06481	2	38	AKT1,INSR
GO: Biological Process	GO:0043269	regulation of ion transport	0.0008975	1	0.007882	0.06481	5	669	AKT1,TNFRSF11A,CALM1,KCNJ11,VDR
GO: Biological Process	GO:0006928	movement of cell or subcellular component	0.0009009	1	0.007882	0.06481	8	1888	CD44,CITED2,NOX4,AKT1,TNFRSF11A,MAPK3,FGF18,INSR
GO: Biological Process	GO:0030855	epithelial cell differentiation	0.0009036	1	0.007882	0.06481	5	670	AKT1,IHH,PTHLH,FOSL2,VDR
GO: Biological Process	GO:0051674	localization of cell	0.0009095	1	0.007882	0.06481	7	1433	CD44,CITED2,NOX4,AKT1,TNFRSF11A,FGF18,INSR
GO: Biological Process	GO:0048870	cell motility	0.0009095	1	0.007882	0.06481	7	1433	CD44,CITED2,NOX4,AKT1,TNFRSF11A,FGF18,INSR
GO: Biological Process	GO:0048871	multicellular organismal homeostasis	0.0009122	1	0.007882	0.06481	4	381	NOX4,TNFRSF11A,IHH,PTHLH
GO: Biological Process	GO:0001890	placenta development	0.0009224	1	0.007937	0.06526	3	166	CITED2,AKT1,VDR
GO: Biological Process	GO:0030203	glycosaminoglycan metabolic process	0.0009385	1	0.008001	0.06579	3	167	CD44,AKT1,BGN
GO: Biological Process	GO:0014065	phosphatidylinositol 3-kinase signaling	0.0009385	1	0.008001	0.06579	3	167	AKT1,MAPK3,FGF18
GO: Biological Process	GO:0033280	response to vitamin D	0.0009451	1	0.008001	0.06579	2	39	INSR,VDR
GO: Biological Process	GO:0030212	hyaluronan metabolic process	0.0009451	1	0.008001	0.06579	2	39	CD44,AKT1
GO: Biological Process	GO:0032870	cellular response to hormone stimulus	0.0009595	1	0.00809	0.06652	5	679	AKT1,ADIPOR1,MAPK3,INSR,VDR
GO: Biological Process	GO:0030099	myeloid cell differentiation	0.0009855	1	0.008264	0.06796	4	389	CITED2,IL11,TNFRSF11A,GPR68
GO: Biological Process	GO:0030799	regulation of cyclic nucleotide metabolic process	0.0009881	1	0.008264	0.06796	3	170	NPR3,CALM1,PTHLH
GO: Biological Process	GO:0048048	embryonic eye morphogenesis	0.0009941	1	0.008282	0.0681	2	40	CITED2,IHH
GO: Biological Process	GO:0006357	regulation of transcription from RNA polymerase II promoter	0.001014	1	0.008418	0.06922	8	1922	CITED2,IL11,AKT1,MAPK3,IHH,FOSL2,ETV7,VDR
GO: Biological Process	GO:0050673	epithelial cell proliferation	0.001033	1	0.008541	0.07023	4	394	AKT1,IHH,FGF18,VDR
GO: Biological Process	GO:0060603	mammary gland duct morphogenesis	0.001044	1	0.008597	0.07069	2	41	PTHLH,VDR
GO: Biological Process	GO:0051090	regulation of sequence-specific DNA binding transcription factor activity	0.001073	1	0.008797	0.07234	4	398	AKT1,TNFRSF11A,MAPK3,PTHLH
GO: Biological Process	GO:0006022	aminoglycan metabolic process	0.001092	1	0.008861	0.07286	3	176	CD44,AKT1,BGN
GO: Biological Process	GO:0010907	positive regulation of glucose metabolic process	0.001096	1	0.008861	0.07286	2	42	AKT1,INSR
GO: Biological Process	GO:0031076	embryonic camera-type eye development	0.001096	1	0.008861	0.07286	2	42	CITED2,IHH
GO: Biological Process	GO:0051050	positive regulation of transport	0.001098	1	0.008861	0.07286	6	1062	AKT1,TNFRSF11A,CALM1,GPR68,KCNJ11,INSR
GO: Biological Process	GO:0007169	transmembrane receptor protein tyrosine kinase signaling pathway	0.001114	1	0.00896	0.07368	5	702	AKT1,ADIPOR1,MAPK3,FGF18,INSR
GO: Biological Process	GO:2000377	regulation of reactive oxygen species metabolic process	0.001128	1	0.009013	0.07411	3	178	NOX4,AKT1,INSR
GO: Biological Process	GO:0060249	anatomical structure homeostasis	0.001134	1	0.009013	0.07411	4	404	NOX4,MAPK3,IHH,PTHLH
GO: Biological Process	GO:0033574	response to testosterone	0.001148	1	0.009013	0.07411	2	43	KCNJ11,INSR
GO: Biological Process	GO:0060709	glycogen cell differentiation involved in embryonic placenta development	0.001172	1	0.009013	0.07411	1	1	AKT1
GO: Biological Process	GO:0060659	nipple sheath formation	0.001172	1	0.009013	0.07411	1	1	PTHLH
GO: Biological Process	GO:0048074	negative regulation of eye pigmentation	0.001172	1	0.009013	0.07411	1	1	IHH
GO: Biological Process	GO:2000656	regulation of apolipoprotein binding	0.001172	1	0.009013	0.07411	1	1	MAPK3
GO: Biological Process	GO:0060649	mammary gland bud elongation	0.001172	1	0.009013	0.07411	1	1	PTHLH
GO: Biological Process	GO:2000657	negative regulation of apolipoprotein binding	0.001172	1	0.009013	0.07411	1	1	MAPK3
GO: Biological Process	GO:0048086	negative regulation of developmental pigmentation	0.001172	1	0.009013	0.07411	1	1	IHH
GO: Biological Process	GO:0100002	negative regulation of protein kinase activity by protein phosphorylation	0.001172	1	0.009013	0.07411	1	1	AKT1
GO: Biological Process	GO:0030704	vitelline membrane formation	0.001172	1	0.009013	0.07411	1	1	IHH
GO: Biological Process	GO:0006954	inflammatory response	0.001202	1	0.009205	0.07569	5	714	CD44,NOX4,AKT1,TNFRSF11A,GPR68
GO: Biological Process	GO:0022414	reproductive process	0.00125	1	0.009512	0.07821	7	1512	CD44,CITED2,AKT1,IHH,PTHLH,INSR,VDR
GO: Biological Process	GO:0045620	negative regulation of lymphocyte differentiation	0.001257	1	0.009512	0.07821	2	45	CD44,IHH
GO: Biological Process	GO:0032881	regulation of polysaccharide metabolic process	0.001257	1	0.009512	0.07821	2	45	AKT1,INSR
GO: Biological Process	GO:0000003	reproduction	0.00126	1	0.009512	0.07821	7	1514	CD44,CITED2,AKT1,IHH,PTHLH,INSR,VDR
GO: Biological Process	GO:0040008	regulation of growth	0.001279	1	0.009618	0.07909	5	724	CD44,AKT1,ADIPOR1,IHH,INSR
GO: Biological Process	GO:0010675	regulation of cellular carbohydrate metabolic process	0.0013	1	0.009746	0.08014	3	187	AKT1,ADIPOR1,INSR
GO: Biological Process	GO:2001259	positive regulation of cation channel activity	0.001313	1	0.009809	0.08066	2	46	CALM1,KCNJ11
GO: Biological Process	GO:0040007	growth	0.001343	1	0.009991	0.08215	6	1104	CD44,AKT1,ADIPOR1,IHH,PTHLH,INSR
GO: Biological Process	GO:0044723	single-organism carbohydrate metabolic process	0.001359	1	0.01008	0.08288	5	734	AKT1,ADIPOR1,CALM1,KCNJ11,INSR
GO: Biological Process	GO:0046326	positive regulation of glucose import	0.001371	1	0.01009	0.083	2	47	AKT1,INSR
GO: Biological Process	GO:0038083	peptidyl-tyrosine autophosphorylation	0.001371	1	0.01009	0.083	2	47	MAPK3,INSR
GO: Biological Process	GO:0001933	negative regulation of protein phosphorylation	0.001391	1	0.01017	0.08365	4	427	AKT1,CALM1,BGN,INSR
GO: Biological Process	GO:0045785	positive regulation of cell adhesion	0.001391	1	0.01017	0.08365	4	427	CD44,CITED2,AKT1,IHH
GO: Biological Process	GO:0097696	STAT cascade	0.001403	1	0.01018	0.08375	3	192	ADIPOR1,MAPK3,BGN
GO: Biological Process	GO:0007259	JAK-STAT cascade	0.001403	1	0.01018	0.08375	3	192	ADIPOR1,MAPK3,BGN
GO: Biological Process	GO:0043436	oxoacid metabolic process	0.001426	1	0.01032	0.08487	6	1117	NOX4,AKT1,ADIPOR1,MAPK3,BGN,INSR
GO: Biological Process	GO:0030334	regulation of cell migration	0.001435	1	0.01035	0.08508	5	743	CITED2,NOX4,AKT1,FGF18,INSR
GO: Biological Process	GO:0022407	regulation of cell-cell adhesion	0.001477	1	0.01062	0.08729	4	434	CD44,CITED2,AKT1,IHH
GO: Biological Process	GO:0044712	single-organism catabolic process	0.001494	1	0.0107	0.08796	6	1127	CD44,AKT1,COL10A1,CALM1,BGN,INSR
GO: Biological Process	GO:0006109	regulation of carbohydrate metabolic process	0.00151	1	0.01078	0.08862	3	197	AKT1,ADIPOR1,INSR
GO: Biological Process	GO:0006082	organic acid metabolic process	0.001542	1	0.01095	0.09005	6	1134	NOX4,AKT1,ADIPOR1,MAPK3,BGN,INSR
GO: Biological Process	GO:0045429	positive regulation of nitric oxide biosynthetic process	0.00155	1	0.01095	0.09005	2	50	AKT1,INSR
GO: Biological Process	GO:1904407	positive regulation of nitric oxide metabolic process	0.00155	1	0.01095	0.09005	2	50	AKT1,INSR
GO: Biological Process	GO:0043434	response to peptide hormone	0.001593	1	0.01122	0.09223	4	443	AKT1,ADIPOR1,MAPK3,INSR
GO: Biological Process	GO:0030335	positive regulation of cell migration	0.001633	1	0.01146	0.09422	4	446	NOX4,AKT1,FGF18,INSR
GO: Biological Process	GO:0048729	tissue morphogenesis	0.001643	1	0.01149	0.09447	5	766	CD44,CITED2,IHH,PTHLH,VDR
GO: Biological Process	GO:0009749	response to glucose	0.001669	1	0.01161	0.09548	3	204	NOX4,GPR68,KCNJ11
GO: Biological Process	GO:0055082	cellular chemical homeostasis	0.001671	1	0.01161	0.09548	5	769	NOX4,CALM1,GPR68,KCNJ11,VDR
GO: Biological Process	GO:0009187	cyclic nucleotide metabolic process	0.00174	1	0.01205	0.09907	3	207	NPR3,CALM1,PTHLH
GO: Biological Process	GO:0032869	cellular response to insulin stimulus	0.001789	1	0.01226	0.1008	3	209	AKT1,ADIPOR1,INSR
GO: Biological Process	GO:0009746	response to hexose	0.001789	1	0.01226	0.1008	3	209	NOX4,GPR68,KCNJ11
GO: Biological Process	GO:1901137	carbohydrate derivative biosynthetic process	0.0018	1	0.01226	0.1008	5	782	NPR3,CALM1,PTHLH,BGN,INSR
GO: Biological Process	GO:0009250	glucan biosynthetic process	0.001806	1	0.01226	0.1008	2	54	AKT1,INSR
GO: Biological Process	GO:0005978	glycogen biosynthetic process	0.001806	1	0.01226	0.1008	2	54	AKT1,INSR
GO: Biological Process	GO:0010828	positive regulation of glucose transport	0.001806	1	0.01226	0.1008	2	54	AKT1,INSR
GO: Biological Process	GO:2000147	positive regulation of cell motility	0.001814	1	0.01228	0.101	4	459	NOX4,AKT1,FGF18,INSR
GO: Biological Process	GO:0051240	positive regulation of multicellular organismal process	0.001846	1	0.01245	0.1024	7	1616	CITED2,AKT1,TNFRSF11A,IHH,GPR68,FGF18,VDR
GO: Biological Process	GO:2000145	regulation of cell motility	0.001925	1	0.01292	0.1063	5	794	CITED2,NOX4,AKT1,FGF18,INSR
GO: Biological Process	GO:0002573	myeloid leukocyte differentiation	0.001939	1	0.01292	0.1063	3	215	CITED2,TNFRSF11A,GPR68
GO: Biological Process	GO:0048538	thymus development	0.001941	1	0.01292	0.1063	2	56	CITED2,MAPK3
GO: Biological Process	GO:0031663	lipopolysaccharide-mediated signaling pathway	0.001941	1	0.01292	0.1063	2	56	AKT1,MAPK3
GO: Biological Process	GO:0010629	negative regulation of gene expression	0.001976	1	0.01312	0.1079	7	1635	CITED2,AKT1,NACC1,PTHLH,ETV7,INSR,VDR
GO: Biological Process	GO:0034284	response to monosaccharide	0.001991	1	0.01315	0.1081	3	217	NOX4,GPR68,KCNJ11
GO: Biological Process	GO:0051272	positive regulation of cellular component movement	0.001994	1	0.01315	0.1081	4	471	NOX4,AKT1,FGF18,INSR
GO: Biological Process	GO:0042326	negative regulation of phosphorylation	0.002041	1	0.01342	0.1103	4	474	AKT1,CALM1,BGN,INSR
GO: Biological Process	GO:0032409	regulation of transporter activity	0.002097	1	0.01371	0.1127	3	221	CALM1,KCNJ11,INSR
GO: Biological Process	GO:1901652	response to peptide	0.002104	1	0.01371	0.1127	4	478	AKT1,ADIPOR1,MAPK3,INSR
GO: Biological Process	GO:0040017	positive regulation of locomotion	0.002104	1	0.01371	0.1127	4	478	NOX4,AKT1,FGF18,INSR
GO: Biological Process	GO:0032872	regulation of stress-activated MAPK cascade	0.002124	1	0.01379	0.1134	3	222	AKT1,TNFRSF11A,MAPK3
GO: Biological Process	GO:1903428	positive regulation of reactive oxygen species biosynthetic process	0.002151	1	0.01385	0.1139	2	59	AKT1,INSR
GO: Biological Process	GO:0070302	regulation of stress-activated protein kinase signaling cascade	0.002152	1	0.01385	0.1139	3	223	AKT1,TNFRSF11A,MAPK3
GO: Biological Process	GO:0009314	response to radiation	0.002153	1	0.01385	0.1139	4	481	NOX4,AKT1,TNFRSF11A,CALM1
GO: Biological Process	GO:0001649	osteoblast differentiation	0.002179	1	0.01397	0.1149	3	224	AKT1,IHH,PTHLH
GO: Biological Process	GO:0048568	embryonic organ development	0.002185	1	0.01397	0.1149	4	483	CITED2,AKT1,MAPK3,IHH
GO: Biological Process	GO:0030324	lung development	0.002207	1	0.01407	0.1157	3	225	MAPK3,PTHLH,FGF18
GO: Biological Process	GO:0045444	fat cell differentiation	0.002235	1	0.0142	0.1168	3	226	IL11,AKT1,INSR
GO: Biological Process	GO:0005975	carbohydrate metabolic process	0.002253	1	0.01428	0.1174	5	823	AKT1,ADIPOR1,CALM1,KCNJ11,INSR
GO: Biological Process	GO:0006027	glycosaminoglycan catabolic process	0.002298	1	0.01431	0.1177	2	61	CD44,BGN
GO: Biological Process	GO:0060443	mammary gland morphogenesis	0.002298	1	0.01431	0.1177	2	61	PTHLH,VDR
GO: Biological Process	GO:0030323	respiratory tube development	0.00232	1	0.01431	0.1177	3	229	MAPK3,PTHLH,FGF18
GO: Biological Process	GO:0100009	regulation of fever generation by prostaglandin secretion	0.002341	1	0.01431	0.1177	1	2	TNFRSF11A
GO: Biological Process	GO:0071810	regulation of fever generation by regulation of prostaglandin secretion	0.002341	1	0.01431	0.1177	1	2	TNFRSF11A
GO: Biological Process	GO:0035802	adrenal cortex formation	0.002341	1	0.01431	0.1177	1	2	CITED2
GO: Biological Process	GO:0060658	nipple morphogenesis	0.002341	1	0.01431	0.1177	1	2	PTHLH
GO: Biological Process	GO:0035801	adrenal cortex development	0.002341	1	0.01431	0.1177	1	2	CITED2
GO: Biological Process	GO:0071848	positive regulation of ERK1 and ERK2 cascade via TNFSF11-mediated signaling	0.002341	1	0.01431	0.1177	1	2	TNFRSF11A
GO: Biological Process	GO:0060086	circadian temperature homeostasis	0.002341	1	0.01431	0.1177	1	2	TNFRSF11A
GO: Biological Process	GO:0060220	camera-type eye photoreceptor cell fate commitment	0.002341	1	0.01431	0.1177	1	2	IHH
GO: Biological Process	GO:0071812	positive regulation of fever generation by positive regulation of prostaglandin secretion	0.002341	1	0.01431	0.1177	1	2	TNFRSF11A
GO: Biological Process	GO:1902532	negative regulation of intracellular signal transduction	0.002372	1	0.01438	0.1183	4	494	CD44,AKT1,CALM1,BGN
GO: Biological Process	GO:0031281	positive regulation of cyclase activity	0.002373	1	0.01438	0.1183	2	62	MAPK3,CALM1
GO: Biological Process	GO:2000573	positive regulation of DNA biosynthetic process	0.002373	1	0.01438	0.1183	2	62	NOX4,MAPK3
GO: Biological Process	GO:2000243	positive regulation of reproductive process	0.002449	1	0.0148	0.1217	2	63	CITED2,INSR
GO: Biological Process	GO:0045595	regulation of cell differentiation	0.002526	1	0.01513	0.1244	7	1706	CD44,AKT1,IHH,GPR68,PTHLH,FGF18,VDR
GO: Biological Process	GO:0001658	branching involved in ureteric bud morphogenesis	0.002526	1	0.01513	0.1244	2	64	CD44,CITED2
GO: Biological Process	GO:0045428	regulation of nitric oxide biosynthetic process	0.002526	1	0.01513	0.1244	2	64	AKT1,INSR
GO: Biological Process	GO:0034112	positive regulation of homotypic cell-cell adhesion	0.002558	1	0.01528	0.1256	3	237	CD44,AKT1,IHH
GO: Biological Process	GO:0001894	tissue homeostasis	0.00265	1	0.01579	0.1298	3	240	NOX4,IHH,PTHLH
GO: Biological Process	GO:1903039	positive regulation of leukocyte cell-cell adhesion	0.002682	1	0.0159	0.1307	3	241	CD44,AKT1,IHH
GO: Biological Process	GO:0042130	negative regulation of T cell proliferation	0.002684	1	0.0159	0.1307	2	66	CD44,IHH
GO: Biological Process	GO:0009743	response to carbohydrate	0.002713	1	0.01603	0.1318	3	242	NOX4,GPR68,KCNJ11
GO: Biological Process	GO:0051270	regulation of cellular component movement	0.002744	1	0.01616	0.1329	5	861	CITED2,NOX4,AKT1,FGF18,INSR
GO: Biological Process	GO:0061515	myeloid cell development	0.002765	1	0.01619	0.1331	2	67	CITED2,GPR68
GO: Biological Process	GO:1903779	regulation of cardiac conduction	0.002765	1	0.01619	0.1331	2	67	CALM1,KCNJ11
GO: Biological Process	GO:0040012	regulation of locomotion	0.002828	1	0.0164	0.1348	5	867	CITED2,NOX4,AKT1,FGF18,INSR
GO: Biological Process	GO:0032410	negative regulation of transporter activity	0.002846	1	0.0164	0.1348	2	68	CALM1,INSR
GO: Biological Process	GO:0001947	heart looping	0.002846	1	0.0164	0.1348	2	68	CITED2,IHH
GO: Biological Process	GO:0032890	regulation of organic acid transport	0.002846	1	0.0164	0.1348	2	68	AKT1,TNFRSF11A
GO: Biological Process	GO:0006026	aminoglycan catabolic process	0.002846	1	0.0164	0.1348	2	68	CD44,BGN
GO: Biological Process	GO:0045453	bone resorption	0.002846	1	0.0164	0.1348	2	68	NOX4,IHH
GO: Biological Process	GO:0033692	cellular polysaccharide biosynthetic process	0.002929	1	0.01678	0.138	2	69	AKT1,INSR
GO: Biological Process	GO:0048645	animal organ formation	0.002929	1	0.01678	0.138	2	69	CITED2,MAPK3
GO: Biological Process	GO:0060675	ureteric bud morphogenesis	0.003013	1	0.01721	0.1416	2	70	CD44,CITED2
GO: Biological Process	GO:0003007	heart morphogenesis	0.003042	1	0.01733	0.1425	3	252	CITED2,IHH,INSR
GO: Biological Process	GO:0072171	mesonephric tubule morphogenesis	0.003098	1	0.01756	0.1444	2	71	CD44,CITED2
GO: Biological Process	GO:0010595	positive regulation of endothelial cell migration	0.003098	1	0.01756	0.1444	2	71	AKT1,FGF18
GO: Biological Process	GO:0019725	cellular homeostasis	0.003122	1	0.01764	0.1451	5	887	NOX4,CALM1,GPR68,KCNJ11,VDR
GO: Biological Process	GO:0048646	anatomical structure formation involved in morphogenesis	0.00314	1	0.01768	0.1454	6	1304	CD44,CITED2,MAPK3,IHH,PTHLH,FGF18
GO: Biological Process	GO:0030258	lipid modification	0.003145	1	0.01768	0.1454	3	255	AKT1,ADIPOR1,FGF18
GO: Biological Process	GO:0009152	purine ribonucleotide biosynthetic process	0.00318	1	0.0178	0.1464	3	256	NPR3,CALM1,PTHLH
GO: Biological Process	GO:0061371	determination of heart left/right asymmetry	0.003185	1	0.0178	0.1464	2	72	CITED2,IHH
GO: Biological Process	GO:0009150	purine ribonucleotide metabolic process	0.003207	1	0.01788	0.147	4	537	NPR3,CALM1,PTHLH,INSR
GO: Biological Process	GO:0050878	regulation of body fluid levels	0.00325	1	0.01803	0.1483	4	539	AKT1,NPR3,MAPK3,VDR
GO: Biological Process	GO:0060541	respiratory system development	0.003251	1	0.01803	0.1483	3	258	MAPK3,PTHLH,FGF18
GO: Biological Process	GO:0010676	positive regulation of cellular carbohydrate metabolic process	0.003272	1	0.0181	0.1488	2	73	AKT1,INSR
GO: Biological Process	GO:0006164	purine nucleotide biosynthetic process	0.003395	1	0.01844	0.1516	3	262	NPR3,CALM1,PTHLH
GO: Biological Process	GO:0072593	reactive oxygen species metabolic process	0.003431	1	0.01844	0.1516	3	263	NOX4,AKT1,INSR
GO: Biological Process	GO:0006809	nitric oxide biosynthetic process	0.00345	1	0.01844	0.1516	2	75	AKT1,INSR
GO: Biological Process	GO:0045761	regulation of adenylate cyclase activity	0.00345	1	0.01844	0.1516	2	75	NPR3,CALM1
GO: Biological Process	GO:0003143	embryonic heart tube morphogenesis	0.00345	1	0.01844	0.1516	2	75	CITED2,IHH
GO: Biological Process	GO:0030908	protein splicing	0.00351	1	0.01844	0.1516	1	3	IHH
GO: Biological Process	GO:0035803	egg coat formation	0.00351	1	0.01844	0.1516	1	3	IHH
GO: Biological Process	GO:0016539	intein-mediated protein splicing	0.00351	1	0.01844	0.1516	1	3	IHH
GO: Biological Process	GO:0010980	positive regulation of vitamin D 24-hydroxylase activity	0.00351	1	0.01844	0.1516	1	3	VDR
GO: Biological Process	GO:0046552	photoreceptor cell fate commitment	0.00351	1	0.01844	0.1516	1	3	IHH
GO: Biological Process	GO:1900623	regulation of monocyte aggregation	0.00351	1	0.01844	0.1516	1	3	CD44
GO: Biological Process	GO:0032079	positive regulation of endodeoxyribonuclease activity	0.00351	1	0.01844	0.1516	1	3	AKT1
GO: Biological Process	GO:0000189	MAPK import into nucleus	0.00351	1	0.01844	0.1516	1	3	MAPK3
GO: Biological Process	GO:0042706	eye photoreceptor cell fate commitment	0.00351	1	0.01844	0.1516	1	3	IHH
GO: Biological Process	GO:0038183	bile acid signaling pathway	0.00351	1	0.01844	0.1516	1	3	VDR
GO: Biological Process	GO:1900625	positive regulation of monocyte aggregation	0.00351	1	0.01844	0.1516	1	3	CD44
GO: Biological Process	GO:0033031	positive regulation of neutrophil apoptotic process	0.00351	1	0.01844	0.1516	1	3	CD44
GO: Biological Process	GO:0010979	regulation of vitamin D 24-hydroxylase activity	0.00351	1	0.01844	0.1516	1	3	VDR
GO: Biological Process	GO:1990418	response to insulin-like growth factor stimulus	0.00351	1	0.01844	0.1516	1	3	AKT1
GO: Biological Process	GO:0048073	regulation of eye pigmentation	0.00351	1	0.01844	0.1516	1	3	IHH
GO: Biological Process	GO:0009259	ribonucleotide metabolic process	0.00354	1	0.01846	0.1518	4	552	NPR3,CALM1,PTHLH,INSR
GO: Biological Process	GO:0046324	regulation of glucose import	0.003541	1	0.01846	0.1518	2	76	AKT1,INSR
GO: Biological Process	GO:0014032	neural crest cell development	0.003541	1	0.01846	0.1518	2	76	CITED2,MAPK3
GO: Biological Process	GO:0043066	negative regulation of apoptotic process	0.003554	1	0.01849	0.152	5	914	CD44,CITED2,IL11,AKT1,IHH
GO: Biological Process	GO:0034612	response to tumor necrosis factor	0.00358	1	0.01853	0.1524	3	267	TNFRSF11A,KCNJ11,INSR
GO: Biological Process	GO:0032868	response to insulin	0.00358	1	0.01853	0.1524	3	267	AKT1,ADIPOR1,INSR
GO: Biological Process	GO:0006163	purine nucleotide metabolic process	0.003633	1	0.01876	0.1542	4	556	NPR3,CALM1,PTHLH,INSR
GO: Biological Process	GO:0009260	ribonucleotide biosynthetic process	0.003656	1	0.01879	0.1545	3	269	NPR3,CALM1,PTHLH
GO: Biological Process	GO:0008015	blood circulation	0.003657	1	0.01879	0.1545	4	557	AKT1,NPR3,CALM1,KCNJ11
GO: Biological Process	GO:0003013	circulatory system process	0.003728	1	0.0191	0.1571	4	560	AKT1,NPR3,CALM1,KCNJ11
GO: Biological Process	GO:0051403	stress-activated MAPK cascade	0.003771	1	0.01911	0.1571	3	272	AKT1,TNFRSF11A,MAPK3
GO: Biological Process	GO:0071407	cellular response to organic cyclic compound	0.003775	1	0.01911	0.1571	4	562	NOX4,AKT1,KCNJ11,VDR
GO: Biological Process	GO:0043069	negative regulation of programmed cell death	0.003794	1	0.01911	0.1571	5	928	CD44,CITED2,IL11,AKT1,IHH
GO: Biological Process	GO:0046390	ribose phosphate biosynthetic process	0.00381	1	0.01911	0.1571	3	273	NPR3,CALM1,PTHLH
GO: Biological Process	GO:0032945	negative regulation of mononuclear cell proliferation	0.00382	1	0.01911	0.1571	2	79	CD44,IHH
GO: Biological Process	GO:0000271	polysaccharide biosynthetic process	0.00382	1	0.01911	0.1571	2	79	AKT1,INSR
GO: Biological Process	GO:0072078	nephron tubule morphogenesis	0.00382	1	0.01911	0.1571	2	79	CD44,CITED2
GO: Biological Process	GO:0002260	lymphocyte homeostasis	0.00382	1	0.01911	0.1571	2	79	CD44,AKT1
GO: Biological Process	GO:0046209	nitric oxide metabolic process	0.00382	1	0.01911	0.1571	2	79	AKT1,INSR
GO: Biological Process	GO:0050672	negative regulation of lymphocyte proliferation	0.00382	1	0.01911	0.1571	2	79	CD44,IHH
GO: Biological Process	GO:0072522	purine-containing compound biosynthetic process	0.00385	1	0.01921	0.158	3	274	NPR3,CALM1,PTHLH
GO: Biological Process	GO:0019693	ribose phosphate metabolic process	0.003897	1	0.0194	0.1595	4	567	NPR3,CALM1,PTHLH,INSR
GO: Biological Process	GO:0032414	positive regulation of ion transmembrane transporter activity	0.003915	1	0.0194	0.1595	2	80	CALM1,KCNJ11
GO: Biological Process	GO:0007422	peripheral nervous system development	0.003915	1	0.0194	0.1595	2	80	CITED2,AKT1
GO: Biological Process	GO:0044702	single organism reproductive process	0.003961	1	0.01958	0.161	6	1366	CD44,CITED2,AKT1,IHH,INSR,VDR
GO: Biological Process	GO:0031098	stress-activated protein kinase signaling cascade	0.004009	1	0.0196	0.1611	3	278	AKT1,TNFRSF11A,MAPK3
GO: Biological Process	GO:1902105	regulation of leukocyte differentiation	0.004009	1	0.0196	0.1611	3	278	CD44,IHH,GPR68
GO: Biological Process	GO:0007189	adenylate cyclase-activating G-protein coupled receptor signaling pathway	0.004011	1	0.0196	0.1611	2	81	NPR3,PTHLH
GO: Biological Process	GO:0072088	nephron epithelium morphogenesis	0.004011	1	0.0196	0.1611	2	81	CD44,CITED2
GO: Biological Process	GO:0034637	cellular carbohydrate biosynthetic process	0.004011	1	0.0196	0.1611	2	81	AKT1,INSR
GO: Biological Process	GO:0043588	skin development	0.004091	1	0.01994	0.1639	3	280	AKT1,FOSL2,VDR
GO: Biological Process	GO:0044275	cellular carbohydrate catabolic process	0.004109	1	0.01998	0.1643	2	82	CALM1,INSR
GO: Biological Process	GO:0048872	homeostasis of number of cells	0.004173	1	0.02022	0.1663	3	282	CD44,CITED2,AKT1
GO: Biological Process	GO:0072028	nephron morphogenesis	0.004207	1	0.02022	0.1663	2	83	CD44,CITED2
GO: Biological Process	GO:2001057	reactive nitrogen species metabolic process	0.004207	1	0.02022	0.1663	2	83	AKT1,INSR
GO: Biological Process	GO:1903426	regulation of reactive oxygen species biosynthetic process	0.004207	1	0.02022	0.1663	2	83	AKT1,INSR
GO: Biological Process	GO:0071260	cellular response to mechanical stimulus	0.004207	1	0.02022	0.1663	2	83	AKT1,MAPK3
GO: Biological Process	GO:0070664	negative regulation of leukocyte proliferation	0.004307	1	0.02051	0.1687	2	84	CD44,IHH
GO: Biological Process	GO:0061333	renal tubule morphogenesis	0.004307	1	0.02051	0.1687	2	84	CD44,CITED2
GO: Biological Process	GO:0045913	positive regulation of carbohydrate metabolic process	0.004307	1	0.02051	0.1687	2	84	AKT1,INSR
GO: Biological Process	GO:0014033	neural crest cell differentiation	0.004307	1	0.02051	0.1687	2	84	CITED2,MAPK3
GO: Biological Process	GO:0015980	energy derivation by oxidation of organic compounds	0.004383	1	0.02083	0.1713	3	287	AKT1,CALM1,INSR
GO: Biological Process	GO:0030819	positive regulation of cAMP biosynthetic process	0.004407	1	0.0209	0.1718	2	85	CALM1,PTHLH
GO: Biological Process	GO:0031667	response to nutrient levels	0.004599	1	0.02135	0.1756	4	594	AKT1,MAPK3,INSR,VDR
GO: Biological Process	GO:0045597	positive regulation of cell differentiation	0.004605	1	0.02135	0.1756	5	971	AKT1,IHH,GPR68,FGF18,VDR
GO: Biological Process	GO:0018107	peptidyl-threonine phosphorylation	0.004612	1	0.02135	0.1756	2	87	AKT1,CALM1
GO: Biological Process	GO:0046634	regulation of alpha-beta T cell activation	0.004612	1	0.02135	0.1756	2	87	CD44,IHH
GO: Biological Process	GO:0070227	lymphocyte apoptotic process	0.004612	1	0.02135	0.1756	2	87	CD44,AKT1
GO: Biological Process	GO:0071496	cellular response to external stimulus	0.004643	1	0.02135	0.1756	3	293	AKT1,MAPK3,VDR
GO: Biological Process	GO:1904849	positive regulation of cell chemotaxis to fibroblast growth factor	0.004677	1	0.02135	0.1756	1	4	FGF18
GO: Biological Process	GO:0090170	regulation of Golgi inheritance	0.004677	1	0.02135	0.1756	1	4	MAPK3
GO: Biological Process	GO:0060618	nipple development	0.004677	1	0.02135	0.1756	1	4	PTHLH
GO: Biological Process	GO:0032077	positive regulation of deoxyribonuclease activity	0.004677	1	0.02135	0.1756	1	4	AKT1
GO: Biological Process	GO:2000546	positive regulation of endothelial cell chemotaxis to fibroblast growth factor	0.004677	1	0.02135	0.1756	1	4	FGF18
GO: Biological Process	GO:0071847	TNFSF11-mediated signaling pathway	0.004677	1	0.02135	0.1756	1	4	TNFRSF11A
GO: Biological Process	GO:0045590	negative regulation of regulatory T cell differentiation	0.004677	1	0.02135	0.1756	1	4	CD44
GO: Biological Process	GO:0060648	mammary gland bud morphogenesis	0.004677	1	0.02135	0.1756	1	4	PTHLH
GO: Biological Process	GO:0061428	negative regulation of transcription from RNA polymerase II promoter in response to hypoxia	0.004677	1	0.02135	0.1756	1	4	CITED2
GO: Biological Process	GO:0010748	negative regulation of plasma membrane long-chain fatty acid transport	0.004677	1	0.02135	0.1756	1	4	AKT1
GO: Biological Process	GO:2001206	positive regulation of osteoclast development	0.004677	1	0.02135	0.1756	1	4	GPR68
GO: Biological Process	GO:0046888	negative regulation of hormone secretion	0.004716	1	0.02144	0.1763	2	88	IL11,KCNJ11
GO: Biological Process	GO:0034766	negative regulation of ion transmembrane transport	0.004716	1	0.02144	0.1763	2	88	AKT1,CALM1
GO: Biological Process	GO:0060341	regulation of cellular localization	0.004782	1	0.02164	0.1779	6	1419	IL11,AKT1,MAPK3,CALM1,GPR68,KCNJ11
GO: Biological Process	GO:0002684	positive regulation of immune system process	0.00479	1	0.02164	0.1779	5	980	CD44,AKT1,MAPK3,IHH,GPR68
GO: Biological Process	GO:0035050	embryonic heart tube development	0.004821	1	0.02164	0.1779	2	89	CITED2,IHH
GO: Biological Process	GO:0051897	positive regulation of protein kinase B signaling	0.004821	1	0.02164	0.1779	2	89	NOX4,INSR
GO: Biological Process	GO:0046323	glucose import	0.004821	1	0.02164	0.1779	2	89	AKT1,INSR
GO: Biological Process	GO:0090596	sensory organ morphogenesis	0.004822	1	0.02164	0.1779	3	297	CITED2,MAPK3,IHH
GO: Biological Process	GO:0072521	purine-containing compound metabolic process	0.004909	1	0.02197	0.1806	4	605	NPR3,CALM1,PTHLH,INSR
GO: Biological Process	GO:0032411	positive regulation of transporter activity	0.004927	1	0.02197	0.1806	2	90	CALM1,KCNJ11
GO: Biological Process	GO:0006029	proteoglycan metabolic process	0.004927	1	0.02197	0.1806	2	90	IHH,BGN
GO: Biological Process	GO:0051339	regulation of lyase activity	0.005034	1	0.0223	0.1834	2	91	NPR3,CALM1
GO: Biological Process	GO:0015908	fatty acid transport	0.005034	1	0.0223	0.1834	2	91	AKT1,TNFRSF11A
GO: Biological Process	GO:0018210	peptidyl-threonine modification	0.005034	1	0.0223	0.1834	2	91	AKT1,CALM1
GO: Biological Process	GO:0046883	regulation of hormone secretion	0.005098	1	0.02254	0.1853	3	303	IL11,GPR68,KCNJ11
GO: Biological Process	GO:0090407	organophosphate biosynthetic process	0.005172	1	0.02278	0.1873	4	614	NPR3,CALM1,PTHLH,FGF18
GO: Biological Process	GO:0055114	oxidation-reduction process	0.005175	1	0.02278	0.1873	5	998	NOX4,AKT1,ADIPOR1,CALM1,INSR
GO: Biological Process	GO:1901566	organonitrogen compound biosynthetic process	0.005229	1	0.02297	0.1889	6	1445	AKT1,NPR3,MAPK3,CALM1,PTHLH,BGN
GO: Biological Process	GO:0045740	positive regulation of DNA replication	0.005362	1	0.02346	0.1929	2	94	MAPK3,INSR
GO: Biological Process	GO:0030816	positive regulation of cAMP metabolic process	0.005362	1	0.02346	0.1929	2	94	CALM1,PTHLH
GO: Biological Process	GO:0001775	cell activation	0.005376	1	0.02347	0.193	5	1007	CD44,IL11,AKT1,MAPK3,IHH
GO: Biological Process	GO:0060548	negative regulation of cell death	0.005467	1	0.02374	0.1952	5	1011	CD44,CITED2,IL11,AKT1,IHH
GO: Biological Process	GO:0032941	secretion by tissue	0.005473	1	0.02374	0.1952	2	95	NPR3,VDR
GO: Biological Process	GO:0046849	bone remodeling	0.005473	1	0.02374	0.1952	2	95	NOX4,IHH
GO: Biological Process	GO:0009991	response to extracellular stimulus	0.005538	1	0.02398	0.1971	4	626	AKT1,MAPK3,INSR,VDR
GO: Biological Process	GO:0043154	negative regulation of cysteine-type endopeptidase activity involved in apoptotic process	0.005586	1	0.02408	0.198	2	96	CD44,AKT1
GO: Biological Process	GO:0034763	negative regulation of transmembrane transport	0.005586	1	0.02408	0.198	2	96	AKT1,CALM1
GO: Biological Process	GO:0097190	apoptotic signaling pathway	0.005601	1	0.0241	0.1981	4	628	CD44,AKT1,TNFRSF11A,VDR
GO: Biological Process	GO:0032101	regulation of response to external stimulus	0.005629	1	0.02417	0.1987	5	1018	CD44,TNFRSF11A,MAPK3,CALM1,FGF18
GO: Biological Process	GO:2001243	negative regulation of intrinsic apoptotic signaling pathway	0.005699	1	0.02419	0.1989	2	97	CD44,AKT1
GO: Biological Process	GO:0072080	nephron tubule development	0.005814	1	0.02419	0.1989	2	98	CD44,CITED2
GO: Biological Process	GO:0033088	negative regulation of immature T cell proliferation in thymus	0.005843	1	0.02419	0.1989	1	5	IHH
GO: Biological Process	GO:0070487	monocyte aggregation	0.005843	1	0.02419	0.1989	1	5	CD44
GO: Biological Process	GO:0002905	regulation of mature B cell apoptotic process	0.005843	1	0.02419	0.1989	1	5	CD44
GO: Biological Process	GO:0072656	maintenance of protein location in mitochondrion	0.005843	1	0.02419	0.1989	1	5	AKT1
GO: Biological Process	GO:1902339	positive regulation of apoptotic process involved in morphogenesis	0.005843	1	0.02419	0.1989	1	5	VDR
GO: Biological Process	GO:1903519	regulation of mammary gland involution	0.005843	1	0.02419	0.1989	1	5	VDR
GO: Biological Process	GO:1904747	positive regulation of apoptotic process involved in development	0.005843	1	0.02419	0.1989	1	5	VDR
GO: Biological Process	GO:0051343	positive regulation of cyclic-nucleotide phosphodiesterase activity	0.005843	1	0.02419	0.1989	1	5	CALM1
GO: Biological Process	GO:0002901	mature B cell apoptotic process	0.005843	1	0.02419	0.1989	1	5	CD44
GO: Biological Process	GO:0002906	negative regulation of mature B cell apoptotic process	0.005843	1	0.02419	0.1989	1	5	CD44
GO: Biological Process	GO:0060058	positive regulation of apoptotic process involved in mammary gland involution	0.005843	1	0.02419	0.1989	1	5	VDR
GO: Biological Process	GO:0060057	apoptotic process involved in mammary gland involution	0.005843	1	0.02419	0.1989	1	5	VDR
GO: Biological Process	GO:2000562	negative regulation of CD4-positive, alpha-beta T cell proliferation	0.005843	1	0.02419	0.1989	1	5	CD44
GO: Biological Process	GO:0034238	macrophage fusion	0.005843	1	0.02419	0.1989	1	5	CD44
GO: Biological Process	GO:1903521	positive regulation of mammary gland involution	0.005843	1	0.02419	0.1989	1	5	VDR
GO: Biological Process	GO:0060971	embryonic heart tube left/right pattern formation	0.005843	1	0.02419	0.1989	1	5	CITED2
GO: Biological Process	GO:0019395	fatty acid oxidation	0.00593	1	0.02441	0.2007	2	99	AKT1,ADIPOR1
GO: Biological Process	GO:2000117	negative regulation of cysteine-type endopeptidase activity	0.00593	1	0.02441	0.2007	2	99	CD44,AKT1
GO: Biological Process	GO:2000278	regulation of DNA biosynthetic process	0.00593	1	0.02441	0.2007	2	99	NOX4,MAPK3
GO: Biological Process	GO:0009165	nucleotide biosynthetic process	0.006035	1	0.02465	0.2027	3	322	NPR3,CALM1,PTHLH
GO: Biological Process	GO:0070661	leukocyte proliferation	0.006035	1	0.02465	0.2027	3	322	CD44,NPR3,IHH
GO: Biological Process	GO:0043467	regulation of generation of precursor metabolites and energy	0.006046	1	0.02465	0.2027	2	100	AKT1,INSR
GO: Biological Process	GO:2001257	regulation of cation channel activity	0.006046	1	0.02465	0.2027	2	100	CALM1,KCNJ11
GO: Biological Process	GO:0001892	embryonic placenta development	0.006046	1	0.02465	0.2027	2	100	CITED2,AKT1
GO: Biological Process	GO:0030316	osteoclast differentiation	0.006164	1	0.02498	0.2054	2	101	TNFRSF11A,GPR68
GO: Biological Process	GO:0060993	kidney morphogenesis	0.006164	1	0.02498	0.2054	2	101	CD44,CITED2
GO: Biological Process	GO:0034440	lipid oxidation	0.006164	1	0.02498	0.2054	2	101	AKT1,ADIPOR1
GO: Biological Process	GO:1901293	nucleoside phosphate biosynthetic process	0.006192	1	0.02504	0.2059	3	325	NPR3,CALM1,PTHLH
GO: Biological Process	GO:0001776	leukocyte homeostasis	0.006283	1	0.02531	0.2082	2	102	CD44,AKT1
GO: Biological Process	GO:0061326	renal tubule development	0.006283	1	0.02531	0.2082	2	102	CD44,CITED2
GO: Biological Process	GO:0048562	embryonic organ morphogenesis	0.006298	1	0.02532	0.2082	3	327	CITED2,MAPK3,IHH
GO: Biological Process	GO:0044703	multi-organism reproductive process	0.006336	1	0.02535	0.2084	5	1047	CITED2,AKT1,IHH,PTHLH,VDR
GO: Biological Process	GO:0001936	regulation of endothelial cell proliferation	0.006403	1	0.02535	0.2084	2	103	AKT1,FGF18
GO: Biological Process	GO:0022600	digestive system process	0.006403	1	0.02535	0.2084	2	103	NPR3,VDR
GO: Biological Process	GO:0043255	regulation of carbohydrate biosynthetic process	0.006403	1	0.02535	0.2084	2	103	AKT1,INSR
GO: Biological Process	GO:0030804	positive regulation of cyclic nucleotide biosynthetic process	0.006403	1	0.02535	0.2084	2	103	CALM1,PTHLH
GO: Biological Process	GO:0050868	negative regulation of T cell activation	0.006403	1	0.02535	0.2084	2	103	CD44,IHH
GO: Biological Process	GO:0032103	positive regulation of response to external stimulus	0.006405	1	0.02535	0.2084	3	329	TNFRSF11A,MAPK3,FGF18
GO: Biological Process	GO:0050863	regulation of T cell activation	0.006405	1	0.02535	0.2084	3	329	CD44,AKT1,IHH
GO: Biological Process	GO:0043065	positive regulation of apoptotic process	0.006425	1	0.02535	0.2084	4	653	CD44,NOX4,AKT1,VDR
GO: Biological Process	GO:0001568	blood vessel development	0.006425	1	0.02535	0.2084	4	653	CITED2,AKT1,IHH,FGF18
GO: Biological Process	GO:0019216	regulation of lipid metabolic process	0.006458	1	0.02543	0.2091	3	330	AKT1,ADIPOR1,VDR
GO: Biological Process	GO:1903409	reactive oxygen species biosynthetic process	0.006524	1	0.02564	0.2108	2	104	AKT1,INSR
GO: Biological Process	GO:0045934	negative regulation of nucleobase-containing compound metabolic process	0.006546	1	0.02568	0.2112	6	1513	CITED2,NPR3,NACC1,PTHLH,ETV7,VDR
GO: Biological Process	GO:0002682	regulation of immune system process	0.006567	1	0.02571	0.2114	6	1514	CD44,AKT1,MAPK3,IHH,CALM1,GPR68
GO: Biological Process	GO:0043068	positive regulation of programmed cell death	0.006634	1	0.02588	0.2128	4	659	CD44,NOX4,AKT1,VDR
GO: Biological Process	GO:0001657	ureteric bud development	0.006646	1	0.02588	0.2128	2	105	CD44,CITED2
GO: Biological Process	GO:0007589	body fluid secretion	0.006646	1	0.02588	0.2128	2	105	NPR3,VDR
GO: Biological Process	GO:1903522	regulation of blood circulation	0.006677	1	0.02595	0.2134	3	334	AKT1,CALM1,KCNJ11
GO: Biological Process	GO:0072164	mesonephric tubule development	0.006769	1	0.02616	0.2151	2	106	CD44,CITED2
GO: Biological Process	GO:0032368	regulation of lipid transport	0.006769	1	0.02616	0.2151	2	106	AKT1,TNFRSF11A
GO: Biological Process	GO:0072163	mesonephric epithelium development	0.006769	1	0.02616	0.2151	2	106	CD44,CITED2
GO: Biological Process	GO:0019087	transformation of host cell by virus	0.007007	1	0.0265	0.2179	1	6	INSR
GO: Biological Process	GO:0036072	direct ossification	0.007007	1	0.0265	0.2179	1	6	FGF18
GO: Biological Process	GO:0060745	mammary gland branching involved in pregnancy	0.007007	1	0.0265	0.2179	1	6	VDR
GO: Biological Process	GO:0031999	negative regulation of fatty acid beta-oxidation	0.007007	1	0.0265	0.2179	1	6	AKT1
GO: Biological Process	GO:0001957	intramembranous ossification	0.007007	1	0.0265	0.2179	1	6	FGF18
GO: Biological Process	GO:1903659	regulation of complement-dependent cytotoxicity	0.007007	1	0.0265	0.2179	1	6	IL11
GO: Biological Process	GO:0010746	regulation of plasma membrane long-chain fatty acid transport	0.007007	1	0.0265	0.2179	1	6	AKT1
GO: Biological Process	GO:0033211	adiponectin-activated signaling pathway	0.007007	1	0.0265	0.2179	1	6	ADIPOR1
GO: Biological Process	GO:0061156	pulmonary artery morphogenesis	0.007007	1	0.0265	0.2179	1	6	CITED2
GO: Biological Process	GO:0033087	negative regulation of immature T cell proliferation	0.007007	1	0.0265	0.2179	1	6	IHH
GO: Biological Process	GO:0003406	retinal pigment epithelium development	0.007007	1	0.0265	0.2179	1	6	IHH
GO: Biological Process	GO:0045656	negative regulation of monocyte differentiation	0.007007	1	0.0265	0.2179	1	6	GPR68
GO: Biological Process	GO:0031400	negative regulation of protein modification process	0.007029	1	0.02653	0.2182	4	670	AKT1,CALM1,BGN,INSR
GO: Biological Process	GO:0032496	response to lipopolysaccharide	0.007126	1	0.02685	0.2208	3	342	AKT1,TNFRSF11A,MAPK3
GO: Biological Process	GO:0033273	response to vitamin	0.007144	1	0.02687	0.2209	2	109	INSR,VDR
GO: Biological Process	GO:1903037	regulation of leukocyte cell-cell adhesion	0.007184	1	0.02697	0.2218	3	343	CD44,AKT1,IHH
GO: Biological Process	GO:0010634	positive regulation of epithelial cell migration	0.007271	1	0.0271	0.2229	2	110	AKT1,FGF18
GO: Biological Process	GO:0030810	positive regulation of nucleotide biosynthetic process	0.007271	1	0.0271	0.2229	2	110	CALM1,PTHLH
GO: Biological Process	GO:1900373	positive regulation of purine nucleotide biosynthetic process	0.007271	1	0.0271	0.2229	2	110	CALM1,PTHLH
GO: Biological Process	GO:0001823	mesonephros development	0.007271	1	0.0271	0.2229	2	110	CD44,CITED2
GO: Biological Process	GO:0001944	vasculature development	0.007402	1	0.02754	0.2265	4	680	CITED2,AKT1,IHH,FGF18
GO: Biological Process	GO:1903038	negative regulation of leukocyte cell-cell adhesion	0.007529	1	0.02796	0.2299	2	112	CD44,IHH
GO: Biological Process	GO:0034110	regulation of homotypic cell-cell adhesion	0.007594	1	0.02815	0.2315	3	350	CD44,AKT1,IHH
GO: Biological Process	GO:0008543	fibroblast growth factor receptor signaling pathway	0.007659	1	0.02834	0.2331	2	113	MAPK3,FGF18
GO: Biological Process	GO:0031331	positive regulation of cellular catabolic process	0.007713	1	0.0285	0.2343	3	352	AKT1,MAPK3,INSR
GO: Biological Process	GO:0030801	positive regulation of cyclic nucleotide metabolic process	0.00779	1	0.02868	0.2358	2	114	CALM1,PTHLH
GO: Biological Process	GO:0072009	nephron epithelium development	0.00779	1	0.02868	0.2358	2	114	CD44,CITED2
GO: Biological Process	GO:0045787	positive regulation of cell cycle	0.007895	1	0.02886	0.2373	3	355	CITED2,AKT1,INSR
GO: Biological Process	GO:0009117	nucleotide metabolic process	0.007945	1	0.02886	0.2373	4	694	NPR3,CALM1,PTHLH,INSR
GO: Biological Process	GO:1904064	positive regulation of cation transmembrane transport	0.008056	1	0.02886	0.2373	2	116	CALM1,KCNJ11
GO: Biological Process	GO:0002237	response to molecule of bacterial origin	0.008079	1	0.02886	0.2373	3	358	AKT1,TNFRSF11A,MAPK3
GO: Biological Process	GO:0046879	hormone secretion	0.008079	1	0.02886	0.2373	3	358	IL11,GPR68,KCNJ11
GO: Biological Process	GO:0030098	lymphocyte differentiation	0.008141	1	0.02886	0.2373	3	359	CD44,IL11,IHH
GO: Biological Process	GO:0045596	negative regulation of cell differentiation	0.008146	1	0.02886	0.2373	4	699	CD44,IHH,GPR68,PTHLH
GO: Biological Process	GO:0010942	positive regulation of cell death	0.008146	1	0.02886	0.2373	4	699	CD44,NOX4,AKT1,VDR
GO: Biological Process	GO:2000561	regulation of CD4-positive, alpha-beta T cell proliferation	0.008171	1	0.02886	0.2373	1	7	CD44
GO: Biological Process	GO:0035360	positive regulation of peroxisome proliferator activated receptor signaling pathway	0.008171	1	0.02886	0.2373	1	7	CITED2
GO: Biological Process	GO:0060440	trachea formation	0.008171	1	0.02886	0.2373	1	7	MAPK3
GO: Biological Process	GO:1904847	regulation of cell chemotaxis to fibroblast growth factor	0.008171	1	0.02886	0.2373	1	7	FGF18
GO: Biological Process	GO:0032071	regulation of endodeoxyribonuclease activity	0.008171	1	0.02886	0.2373	1	7	AKT1
GO: Biological Process	GO:0071316	cellular response to nicotine	0.008171	1	0.02886	0.2373	1	7	KCNJ11
GO: Biological Process	GO:0060558	regulation of calcidiol 1-monooxygenase activity	0.008171	1	0.02886	0.2373	1	7	VDR
GO: Biological Process	GO:0097278	complement-dependent cytotoxicity	0.008171	1	0.02886	0.2373	1	7	IL11
GO: Biological Process	GO:0035766	cell chemotaxis to fibroblast growth factor	0.008171	1	0.02886	0.2373	1	7	FGF18
GO: Biological Process	GO:0035768	endothelial cell chemotaxis to fibroblast growth factor	0.008171	1	0.02886	0.2373	1	7	FGF18
GO: Biological Process	GO:0019800	peptide cross-linking via chondroitin 4-sulfate glycosaminoglycan	0.008171	1	0.02886	0.2373	1	7	BGN
GO: Biological Process	GO:1904417	positive regulation of xenophagy	0.008171	1	0.02886	0.2373	1	7	MAPK3
GO: Biological Process	GO:0033034	positive regulation of myeloid cell apoptotic process	0.008171	1	0.02886	0.2373	1	7	CD44
GO: Biological Process	GO:0033029	regulation of neutrophil apoptotic process	0.008171	1	0.02886	0.2373	1	7	CD44
GO: Biological Process	GO:1904415	regulation of xenophagy	0.008171	1	0.02886	0.2373	1	7	MAPK3
GO: Biological Process	GO:2000544	regulation of endothelial cell chemotaxis to fibroblast growth factor	0.008171	1	0.02886	0.2373	1	7	FGF18
GO: Biological Process	GO:0032269	negative regulation of cellular protein metabolic process	0.00827	1	0.02916	0.2398	5	1116	CD44,AKT1,CALM1,BGN,INSR
GO: Biological Process	GO:0006753	nucleoside phosphate metabolic process	0.00835	1	0.02939	0.2417	4	704	NPR3,CALM1,PTHLH,INSR
GO: Biological Process	GO:0010594	regulation of endothelial cell migration	0.008462	1	0.02964	0.2437	2	119	AKT1,FGF18
GO: Biological Process	GO:0010827	regulation of glucose transport	0.008462	1	0.02964	0.2437	2	119	AKT1,INSR
GO: Biological Process	GO:0034111	negative regulation of homotypic cell-cell adhesion	0.008462	1	0.02964	0.2437	2	119	CD44,IHH
GO: Biological Process	GO:0030155	regulation of cell adhesion	0.008557	1	0.02992	0.246	4	709	CD44,CITED2,AKT1,IHH
GO: Biological Process	GO:0046649	lymphocyte activation	0.008683	1	0.03031	0.2492	4	712	CD44,IL11,AKT1,IHH
GO: Biological Process	GO:0071887	leukocyte apoptotic process	0.008738	1	0.03045	0.2504	2	121	CD44,AKT1
GO: Biological Process	GO:0031327	negative regulation of cellular biosynthetic process	0.008856	1	0.03078	0.2531	6	1611	CITED2,NPR3,NACC1,PTHLH,ETV7,VDR
GO: Biological Process	GO:0032963	collagen metabolic process	0.008877	1	0.03078	0.2531	2	122	COL10A1,IHH
GO: Biological Process	GO:0001935	endothelial cell proliferation	0.008877	1	0.03078	0.2531	2	122	AKT1,FGF18
GO: Biological Process	GO:0009914	hormone transport	0.008906	1	0.03083	0.2535	3	371	IL11,GPR68,KCNJ11
GO: Biological Process	GO:1903706	regulation of hemopoiesis	0.009037	1	0.03122	0.2567	3	373	CD44,IHH,GPR68
GO: Biological Process	GO:0010959	regulation of metal ion transport	0.009104	1	0.03122	0.2567	3	374	AKT1,CALM1,VDR
GO: Biological Process	GO:0070555	response to interleukin-1	0.009159	1	0.03122	0.2567	2	124	TNFRSF11A,MAPK3
GO: Biological Process	GO:0009790	embryo development	0.009229	1	0.03122	0.2567	5	1146	CITED2,AKT1,MAPK3,IHH,INSR
GO: Biological Process	GO:0060267	positive regulation of respiratory burst	0.009333	1	0.03122	0.2567	1	8	INSR
GO: Biological Process	GO:0032070	regulation of deoxyribonuclease activity	0.009333	1	0.03122	0.2567	1	8	AKT1
GO: Biological Process	GO:1900094	regulation of transcription from RNA polymerase II promoter involved in determination of left/right symmetry	0.009333	1	0.03122	0.2567	1	8	CITED2
GO: Biological Process	GO:0031659	positive regulation of cyclin-dependent protein serine/threonine kinase activity involved in G1/S transition of mitotic cell cycle	0.009333	1	0.03122	0.2567	1	8	AKT1
GO: Biological Process	GO:0015911	plasma membrane long-chain fatty acid transport	0.009333	1	0.03122	0.2567	1	8	AKT1
GO: Biological Process	GO:0002158	osteoclast proliferation	0.009333	1	0.03122	0.2567	1	8	NPR3
GO: Biological Process	GO:1900164	nodal signaling pathway involved in determination of lateral mesoderm left/right asymmetry	0.009333	1	0.03122	0.2567	1	8	CITED2
GO: Biological Process	GO:1903960	negative regulation of anion transmembrane transport	0.009333	1	0.03122	0.2567	1	8	AKT1
GO: Biological Process	GO:2000020	positive regulation of male gonad development	0.009333	1	0.03122	0.2567	1	8	CITED2
GO: Biological Process	GO:0060136	embryonic process involved in female pregnancy	0.009333	1	0.03122	0.2567	1	8	CITED2
GO: Biological Process	GO:0070141	response to UV-A	0.009333	1	0.03122	0.2567	1	8	AKT1
GO: Biological Process	GO:0035739	CD4-positive, alpha-beta T cell proliferation	0.009333	1	0.03122	0.2567	1	8	CD44
GO: Biological Process	GO:0032287	peripheral nervous system myelin maintenance	0.009333	1	0.03122	0.2567	1	8	AKT1
GO: Biological Process	GO:0097011	cellular response to granulocyte macrophage colony-stimulating factor stimulus	0.009333	1	0.03122	0.2567	1	8	AKT1
GO: Biological Process	GO:0006975	DNA damage induced protein phosphorylation	0.009333	1	0.03122	0.2567	1	8	MAPK3
GO: Biological Process	GO:1903012	positive regulation of bone development	0.009333	1	0.03122	0.2567	1	8	GPR68
GO: Biological Process	GO:0038107	nodal signaling pathway involved in determination of left/right asymmetry	0.009333	1	0.03122	0.2567	1	8	CITED2
GO: Biological Process	GO:0006631	fatty acid metabolic process	0.009507	1	0.03176	0.2611	3	380	AKT1,ADIPOR1,MAPK3
GO: Biological Process	GO:0044259	multicellular organismal macromolecule metabolic process	0.009589	1	0.03198	0.2629	2	127	COL10A1,IHH
GO: Biological Process	GO:0009890	negative regulation of biosynthetic process	0.009698	1	0.03229	0.2655	6	1642	CITED2,NPR3,NACC1,PTHLH,ETV7,VDR
GO: Biological Process	GO:0051172	negative regulation of nitrogen compound metabolic process	0.009782	1	0.03252	0.2674	6	1645	CITED2,NPR3,NACC1,PTHLH,ETV7,VDR
GO: Biological Process	GO:0048593	camera-type eye morphogenesis	0.00988	1	0.03279	0.2697	2	129	CITED2,IHH
GO: Biological Process	GO:0019637	organophosphate metabolic process	0.009945	1	0.03295	0.271	5	1167	NPR3,CALM1,PTHLH,FGF18,INSR
GO: Biological Process	GO:0007368	determination of left/right symmetry	0.01003	1	0.03318	0.2728	2	130	CITED2,IHH
GO: Biological Process	GO:0006952	defense response	0.01007	1	0.03326	0.2735	6	1655	CD44,NOX4,AKT1,TNFRSF11A,MAPK3,GPR68
GO: Biological Process	GO:0061337	cardiac conduction	0.01018	1	0.03356	0.276	2	131	CALM1,KCNJ11
GO: Biological Process	GO:0051342	regulation of cyclic-nucleotide phosphodiesterase activity	0.01049	1	0.03386	0.2784	1	9	CALM1
GO: Biological Process	GO:0001781	neutrophil apoptotic process	0.01049	1	0.03386	0.2784	1	9	CD44
GO: Biological Process	GO:0031657	regulation of cyclin-dependent protein serine/threonine kinase activity involved in G1/S transition of mitotic cell cycle	0.01049	1	0.03386	0.2784	1	9	AKT1
GO: Biological Process	GO:0060556	regulation of vitamin D biosynthetic process	0.01049	1	0.03386	0.2784	1	9	VDR
GO: Biological Process	GO:0097012	response to granulocyte macrophage colony-stimulating factor	0.01049	1	0.03386	0.2784	1	9	AKT1
GO: Biological Process	GO:0003140	determination of left/right asymmetry in lateral mesoderm	0.01049	1	0.03386	0.2784	1	9	CITED2
GO: Biological Process	GO:0033085	negative regulation of T cell differentiation in thymus	0.01049	1	0.03386	0.2784	1	9	IHH
GO: Biological Process	GO:0090594	inflammatory response to wounding	0.01049	1	0.03386	0.2784	1	9	CD44
GO: Biological Process	GO:0060316	positive regulation of ryanodine-sensitive calcium-release channel activity	0.01049	1	0.03386	0.2784	1	9	CALM1
GO: Biological Process	GO:2000192	negative regulation of fatty acid transport	0.01049	1	0.03386	0.2784	1	9	AKT1
GO: Biological Process	GO:0002246	wound healing involved in inflammatory response	0.01049	1	0.03386	0.2784	1	9	CD44
GO: Biological Process	GO:1901844	regulation of cell communication by electrical coupling involved in cardiac conduction	0.01049	1	0.03386	0.2784	1	9	CALM1
GO: Biological Process	GO:0046642	negative regulation of alpha-beta T cell proliferation	0.01049	1	0.03386	0.2784	1	9	CD44
GO: Biological Process	GO:0070561	vitamin D receptor signaling pathway	0.01049	1	0.03386	0.2784	1	9	VDR
GO: Biological Process	GO:0080135	regulation of cellular response to stress	0.01053	1	0.03392	0.2789	4	753	CD44,AKT1,TNFRSF11A,MAPK3
GO: Biological Process	GO:0006091	generation of precursor metabolites and energy	0.01056	1	0.03397	0.2793	3	395	AKT1,CALM1,INSR
GO: Biological Process	GO:0009968	negative regulation of signal transduction	0.01066	1	0.03425	0.2816	5	1187	CD44,AKT1,IHH,CALM1,BGN
GO: Biological Process	GO:0051248	negative regulation of protein metabolic process	0.0107	1	0.03431	0.2821	5	1188	CD44,AKT1,CALM1,BGN,INSR
GO: Biological Process	GO:0051896	regulation of protein kinase B signaling	0.01078	1	0.03446	0.2834	2	135	NOX4,INSR
GO: Biological Process	GO:0045580	regulation of T cell differentiation	0.01078	1	0.03446	0.2834	2	135	CD44,IHH
GO: Biological Process	GO:0046631	alpha-beta T cell activation	0.01109	1	0.03539	0.291	2	137	CD44,IHH
GO: Biological Process	GO:0055086	nucleobase-containing small molecule metabolic process	0.01116	1	0.03558	0.2926	4	766	NPR3,CALM1,PTHLH,INSR
GO: Biological Process	GO:0034109	homotypic cell-cell adhesion	0.0113	1	0.03596	0.2957	3	405	CD44,AKT1,IHH
GO: Biological Process	GO:0051250	negative regulation of lymphocyte activation	0.0114	1	0.03622	0.2978	2	139	CD44,IHH
GO: Biological Process	GO:0009100	glycoprotein metabolic process	0.01145	1	0.03631	0.2986	3	407	IHH,BGN,INSR
GO: Biological Process	GO:0030216	keratinocyte differentiation	0.01155	1	0.03631	0.2986	2	140	FOSL2,VDR
GO: Biological Process	GO:0033129	positive regulation of histone phosphorylation	0.01165	1	0.03631	0.2986	1	10	MAPK3
GO: Biological Process	GO:1901841	regulation of high voltage-gated calcium channel activity	0.01165	1	0.03631	0.2986	1	10	CALM1
GO: Biological Process	GO:2001204	regulation of osteoclast development	0.01165	1	0.03631	0.2986	1	10	GPR68
GO: Biological Process	GO:0072584	caveolin-mediated endocytosis	0.01165	1	0.03631	0.2986	1	10	MAPK3
GO: Biological Process	GO:0046322	negative regulation of fatty acid oxidation	0.01165	1	0.03631	0.2986	1	10	AKT1
GO: Biological Process	GO:0034116	positive regulation of heterotypic cell-cell adhesion	0.01165	1	0.03631	0.2986	1	10	CD44
GO: Biological Process	GO:2000399	negative regulation of thymocyte aggregation	0.01165	1	0.03631	0.2986	1	10	IHH
GO: Biological Process	GO:0042473	outer ear morphogenesis	0.01165	1	0.03631	0.2986	1	10	MAPK3
GO: Biological Process	GO:0033210	leptin-mediated signaling pathway	0.01165	1	0.03631	0.2986	1	10	ADIPOR1
GO: Biological Process	GO:0097201	negative regulation of transcription from RNA polymerase II promoter in response to stress	0.01165	1	0.03631	0.2986	1	10	CITED2
GO: Biological Process	GO:0060020	Bergmann glial cell differentiation	0.01165	1	0.03631	0.2986	1	10	MAPK3
GO: Biological Process	GO:0009855	determination of bilateral symmetry	0.01171	1	0.03644	0.2997	2	141	CITED2,IHH
GO: Biological Process	GO:0038095	Fc-epsilon receptor signaling pathway	0.01187	1	0.03683	0.3028	2	142	MAPK3,CALM1
GO: Biological Process	GO:0009799	specification of symmetry	0.01187	1	0.03683	0.3028	2	142	CITED2,IHH
GO: Biological Process	GO:0009896	positive regulation of catabolic process	0.01199	1	0.03714	0.3054	3	414	AKT1,MAPK3,INSR
GO: Biological Process	GO:0071456	cellular response to hypoxia	0.01219	1	0.03766	0.3096	2	144	CITED2,AKT1
GO: Biological Process	GO:0072006	nephron development	0.01219	1	0.03766	0.3096	2	144	CD44,CITED2
GO: Biological Process	GO:0044236	multicellular organism metabolic process	0.01235	1	0.0381	0.3133	2	145	COL10A1,IHH
GO: Biological Process	GO:0060537	muscle tissue development	0.01238	1	0.03814	0.3136	3	419	CITED2,NOX4,IHH
GO: Biological Process	GO:0046683	response to organophosphorus	0.01252	1	0.03843	0.316	2	146	NOX4,KCNJ11
GO: Biological Process	GO:0043271	negative regulation of ion transport	0.01252	1	0.03843	0.316	2	146	AKT1,CALM1
GO: Biological Process	GO:0001701	in utero embryonic development	0.0127	1	0.03887	0.3196	3	423	CITED2,AKT1,IHH
GO: Biological Process	GO:0002683	negative regulation of immune system process	0.01279	1	0.03887	0.3196	3	424	CD44,IHH,GPR68
GO: Biological Process	GO:0033084	regulation of immature T cell proliferation in thymus	0.01281	1	0.03887	0.3196	1	11	IHH
GO: Biological Process	GO:0031017	exocrine pancreas development	0.01281	1	0.03887	0.3196	1	11	INSR
GO: Biological Process	GO:0031622	positive regulation of fever generation	0.01281	1	0.03887	0.3196	1	11	TNFRSF11A
GO: Biological Process	GO:0045792	negative regulation of cell size	0.01281	1	0.03887	0.3196	1	11	AKT1
GO: Biological Process	GO:0008584	male gonad development	0.01284	1	0.03887	0.3196	2	148	CITED2,INSR
GO: Biological Process	GO:0046546	development of primary male sexual characteristics	0.01284	1	0.03887	0.3196	2	148	CITED2,INSR
GO: Biological Process	GO:0072073	kidney epithelium development	0.01284	1	0.03887	0.3196	2	148	CD44,CITED2
GO: Biological Process	GO:0044724	single-organism carbohydrate catabolic process	0.01284	1	0.03887	0.3196	2	148	CALM1,INSR
GO: Biological Process	GO:2000241	regulation of reproductive process	0.01301	1	0.03931	0.3233	2	149	CITED2,INSR
GO: Biological Process	GO:0051046	regulation of secretion	0.01305	1	0.03938	0.3238	4	802	IL11,TNFRSF11A,GPR68,KCNJ11
GO: Biological Process	GO:0036294	cellular response to decreased oxygen levels	0.01334	1	0.04021	0.3306	2	151	CITED2,AKT1
GO: Biological Process	GO:0016337	single organismal cell-cell adhesion	0.0135	1	0.04054	0.3333	4	810	CD44,CITED2,AKT1,IHH
GO: Biological Process	GO:0002262	myeloid cell homeostasis	0.01351	1	0.04054	0.3333	2	152	CD44,CITED2
GO: Biological Process	GO:0034767	positive regulation of ion transmembrane transport	0.01351	1	0.04054	0.3333	2	152	CALM1,KCNJ11
GO: Biological Process	GO:0045892	negative regulation of transcription, DNA-templated	0.01381	1	0.04108	0.3378	5	1265	CITED2,NACC1,PTHLH,ETV7,VDR
GO: Biological Process	GO:0042640	anagen	0.01397	1	0.04108	0.3378	1	12	AKT1
GO: Biological Process	GO:0048069	eye pigmentation	0.01397	1	0.04108	0.3378	1	12	IHH
GO: Biological Process	GO:1903358	regulation of Golgi organization	0.01397	1	0.04108	0.3378	1	12	MAPK3
GO: Biological Process	GO:0031620	regulation of fever generation	0.01397	1	0.04108	0.3378	1	12	TNFRSF11A
GO: Biological Process	GO:0042368	vitamin D biosynthetic process	0.01397	1	0.04108	0.3378	1	12	VDR
GO: Biological Process	GO:0060056	mammary gland involution	0.01397	1	0.04108	0.3378	1	12	VDR
GO: Biological Process	GO:0033080	immature T cell proliferation in thymus	0.01397	1	0.04108	0.3378	1	12	IHH
GO: Biological Process	GO:2000018	regulation of male gonad development	0.01397	1	0.04108	0.3378	1	12	CITED2
GO: Biological Process	GO:0060439	trachea morphogenesis	0.01397	1	0.04108	0.3378	1	12	MAPK3
GO: Biological Process	GO:0030208	dermatan sulfate biosynthetic process	0.01397	1	0.04108	0.3378	1	12	BGN
GO: Biological Process	GO:1902337	regulation of apoptotic process involved in morphogenesis	0.01397	1	0.04108	0.3378	1	12	VDR
GO: Biological Process	GO:0035358	regulation of peroxisome proliferator activated receptor signaling pathway	0.01397	1	0.04108	0.3378	1	12	CITED2
GO: Biological Process	GO:0060315	negative regulation of ryanodine-sensitive calcium-release channel activity	0.01397	1	0.04108	0.3378	1	12	CALM1
GO: Biological Process	GO:0000187	activation of MAPK activity	0.01437	1	0.04208	0.346	2	157	MAPK3,INSR
GO: Biological Process	GO:0016052	carbohydrate catabolic process	0.01437	1	0.04208	0.346	2	157	CALM1,INSR
GO: Biological Process	GO:1902107	positive regulation of leukocyte differentiation	0.01437	1	0.04208	0.346	2	157	IHH,GPR68
GO: Biological Process	GO:0007188	adenylate cyclase-modulating G-protein coupled receptor signaling pathway	0.01454	1	0.04244	0.349	2	158	NPR3,PTHLH
GO: Biological Process	GO:0046890	regulation of lipid biosynthetic process	0.01454	1	0.04244	0.349	2	158	AKT1,VDR
GO: Biological Process	GO:0001558	regulation of cell growth	0.01455	1	0.04244	0.349	3	445	CD44,AKT1,ADIPOR1
GO: Biological Process	GO:0071453	cellular response to oxygen levels	0.01472	1	0.04286	0.3524	2	159	CITED2,AKT1
GO: Biological Process	GO:0051249	regulation of lymphocyte activation	0.01482	1	0.04291	0.3528	3	448	CD44,AKT1,IHH
GO: Biological Process	GO:0045321	leukocyte activation	0.01483	1	0.04291	0.3528	4	833	CD44,IL11,AKT1,IHH
GO: Biological Process	GO:0034764	positive regulation of transmembrane transport	0.01489	1	0.04291	0.3528	2	160	CALM1,KCNJ11
GO: Biological Process	GO:2001242	regulation of intrinsic apoptotic signaling pathway	0.01489	1	0.04291	0.3528	2	160	CD44,AKT1
GO: Biological Process	GO:0022408	negative regulation of cell-cell adhesion	0.01507	1	0.04291	0.3528	2	161	CD44,IHH
GO: Biological Process	GO:0043217	myelin maintenance	0.01512	1	0.04291	0.3528	1	13	AKT1
GO: Biological Process	GO:2001028	positive regulation of endothelial cell chemotaxis	0.01512	1	0.04291	0.3528	1	13	FGF18
GO: Biological Process	GO:0043129	surfactant homeostasis	0.01512	1	0.04291	0.3528	1	13	PTHLH
GO: Biological Process	GO:1904748	regulation of apoptotic process involved in development	0.01512	1	0.04291	0.3528	1	13	VDR
GO: Biological Process	GO:2000194	regulation of female gonad development	0.01512	1	0.04291	0.3528	1	13	INSR
GO: Biological Process	GO:0045618	positive regulation of keratinocyte differentiation	0.01512	1	0.04291	0.3528	1	13	VDR
GO: Biological Process	GO:0030205	dermatan sulfate metabolic process	0.01512	1	0.04291	0.3528	1	13	BGN
GO: Biological Process	GO:0046628	positive regulation of insulin receptor signaling pathway	0.01512	1	0.04291	0.3528	1	13	ADIPOR1
GO: Biological Process	GO:0010839	negative regulation of keratinocyte proliferation	0.01512	1	0.04291	0.3528	1	13	VDR
GO: Biological Process	GO:1902166	negative regulation of intrinsic apoptotic signaling pathway in response to DNA damage by p53 class mediator	0.01512	1	0.04291	0.3528	1	13	CD44
GO: Biological Process	GO:0010649	regulation of cell communication by electrical coupling	0.01512	1	0.04291	0.3528	1	13	CALM1
GO: Biological Process	GO:0033083	regulation of immature T cell proliferation	0.01512	1	0.04291	0.3528	1	13	IHH
GO: Biological Process	GO:0032308	positive regulation of prostaglandin secretion	0.01512	1	0.04291	0.3528	1	13	TNFRSF11A
GO: Biological Process	GO:0030656	regulation of vitamin metabolic process	0.01512	1	0.04291	0.3528	1	13	VDR
GO: Biological Process	GO:0046425	regulation of JAK-STAT cascade	0.01525	1	0.04309	0.3543	2	162	ADIPOR1,BGN
GO: Biological Process	GO:1904892	regulation of STAT cascade	0.01525	1	0.04309	0.3543	2	162	ADIPOR1,BGN
GO: Biological Process	GO:0002695	negative regulation of leukocyte activation	0.01525	1	0.04309	0.3543	2	162	CD44,IHH
GO: Biological Process	GO:0034765	regulation of ion transmembrane transport	0.01544	1	0.04357	0.3583	3	455	AKT1,CALM1,KCNJ11
GO: Biological Process	GO:0043542	endothelial cell migration	0.01561	1	0.04398	0.3616	2	164	AKT1,FGF18
GO: Biological Process	GO:1903507	negative regulation of nucleic acid-templated transcription	0.01574	1	0.04429	0.3642	5	1307	CITED2,NACC1,PTHLH,ETV7,VDR
GO: Biological Process	GO:0045619	regulation of lymphocyte differentiation	0.01579	1	0.04431	0.3643	2	165	CD44,IHH
GO: Biological Process	GO:0055123	digestive system development	0.01579	1	0.04431	0.3643	2	165	IHH,INSR
GO: Biological Process	GO:0044070	regulation of anion transport	0.01597	1	0.04467	0.3673	2	166	AKT1,TNFRSF11A
GO: Biological Process	GO:0015758	glucose transport	0.01615	1	0.04467	0.3673	2	167	AKT1,INSR
GO: Biological Process	GO:1901796	regulation of signal transduction by p53 class mediator	0.01615	1	0.04467	0.3673	2	167	CD44,AKT1
GO: Biological Process	GO:0030001	metal ion transport	0.01619	1	0.04467	0.3673	4	855	AKT1,CALM1,KCNJ11,VDR
GO: Biological Process	GO:0060263	regulation of respiratory burst	0.01628	1	0.04467	0.3673	1	14	INSR
GO: Biological Process	GO:0006924	activation-induced cell death of T cells	0.01628	1	0.04467	0.3673	1	14	AKT1
GO: Biological Process	GO:0002903	negative regulation of B cell apoptotic process	0.01628	1	0.04467	0.3673	1	14	CD44
GO: Biological Process	GO:0003334	keratinocyte development	0.01628	1	0.04467	0.3673	1	14	FOSL2
GO: Biological Process	GO:0005513	detection of calcium ion	0.01628	1	0.04467	0.3673	1	14	CALM1
GO: Biological Process	GO:0070986	left/right axis specification	0.01628	1	0.04467	0.3673	1	14	CITED2
GO: Biological Process	GO:0033079	immature T cell proliferation	0.01628	1	0.04467	0.3673	1	14	IHH
GO: Biological Process	GO:0032306	regulation of prostaglandin secretion	0.01628	1	0.04467	0.3673	1	14	TNFRSF11A
GO: Biological Process	GO:0043518	negative regulation of DNA damage response, signal transduction by p53 class mediator	0.01628	1	0.04467	0.3673	1	14	CD44
GO: Biological Process	GO:0048313	Golgi inheritance	0.01628	1	0.04467	0.3673	1	14	MAPK3
GO: Biological Process	GO:0030207	chondroitin sulfate catabolic process	0.01628	1	0.04467	0.3673	1	14	BGN
GO: Biological Process	GO:0031652	positive regulation of heat generation	0.01628	1	0.04467	0.3673	1	14	TNFRSF11A
GO: Biological Process	GO:0045655	regulation of monocyte differentiation	0.01628	1	0.04467	0.3673	1	14	GPR68
GO: Biological Process	GO:1902679	negative regulation of RNA biosynthetic process	0.01647	1	0.04509	0.3707	5	1322	CITED2,NACC1,PTHLH,ETV7,VDR
GO: Biological Process	GO:0030168	platelet activation	0.01652	1	0.04509	0.3707	2	169	AKT1,MAPK3
GO: Biological Process	GO:0015718	monocarboxylic acid transport	0.01652	1	0.04509	0.3707	2	169	AKT1,TNFRSF11A
GO: Biological Process	GO:0008645	hexose transport	0.01652	1	0.04509	0.3707	2	169	AKT1,INSR
GO: Biological Process	GO:0071222	cellular response to lipopolysaccharide	0.0167	1	0.04553	0.3744	2	170	AKT1,MAPK3
GO: Biological Process	GO:0098602	single organism cell adhesion	0.01677	1	0.04565	0.3754	4	864	CD44,CITED2,AKT1,IHH
GO: Biological Process	GO:0009408	response to heat	0.01689	1	0.0458	0.3766	2	171	AKT1,MAPK3
GO: Biological Process	GO:0014074	response to purine-containing compound	0.01689	1	0.0458	0.3766	2	171	NOX4,KCNJ11
GO: Biological Process	GO:0015749	monosaccharide transport	0.01689	1	0.0458	0.3766	2	171	AKT1,INSR
GO: Biological Process	GO:0071478	cellular response to radiation	0.01707	1	0.04601	0.3784	2	172	NOX4,CALM1
GO: Biological Process	GO:0006275	regulation of DNA replication	0.01707	1	0.04601	0.3784	2	172	MAPK3,INSR
GO: Biological Process	GO:0034762	regulation of transmembrane transport	0.01712	1	0.04601	0.3784	3	473	AKT1,CALM1,KCNJ11
GO: Biological Process	GO:0060442	branching involved in prostate gland morphogenesis	0.01743	1	0.04601	0.3784	1	15	CD44
GO: Biological Process	GO:0010763	positive regulation of fibroblast migration	0.01743	1	0.04601	0.3784	1	15	AKT1
GO: Biological Process	GO:0048875	chemical homeostasis within a tissue	0.01743	1	0.04601	0.3784	1	15	PTHLH
GO: Biological Process	GO:0032075	positive regulation of nuclease activity	0.01743	1	0.04601	0.3784	1	15	AKT1
GO: Biological Process	GO:0001780	neutrophil homeostasis	0.01743	1	0.04601	0.3784	1	15	CD44
GO: Biological Process	GO:0050651	dermatan sulfate proteoglycan biosynthetic process	0.01743	1	0.04601	0.3784	1	15	BGN
GO: Biological Process	GO:2000400	positive regulation of thymocyte aggregation	0.01743	1	0.04601	0.3784	1	15	IHH
GO: Biological Process	GO:0060712	spongiotrophoblast layer development	0.01743	1	0.04601	0.3784	1	15	AKT1
GO: Biological Process	GO:0033127	regulation of histone phosphorylation	0.01743	1	0.04601	0.3784	1	15	MAPK3
GO: Biological Process	GO:0030238	male sex determination	0.01743	1	0.04601	0.3784	1	15	INSR
GO: Biological Process	GO:0090136	epithelial cell-cell adhesion	0.01743	1	0.04601	0.3784	1	15	IHH
GO: Biological Process	GO:0035988	chondrocyte proliferation	0.01743	1	0.04601	0.3784	1	15	IHH
GO: Biological Process	GO:0060397	JAK-STAT cascade involved in growth hormone signaling pathway	0.01743	1	0.04601	0.3784	1	15	MAPK3
GO: Biological Process	GO:0030214	hyaluronan catabolic process	0.01743	1	0.04601	0.3784	1	15	CD44
GO: Biological Process	GO:0033089	positive regulation of T cell differentiation in thymus	0.01743	1	0.04601	0.3784	1	15	IHH
GO: Biological Process	GO:0050667	homocysteine metabolic process	0.01743	1	0.04601	0.3784	1	15	NOX4
GO: Biological Process	GO:0001660	fever generation	0.01743	1	0.04601	0.3784	1	15	TNFRSF11A
GO: Biological Process	GO:0048308	organelle inheritance	0.01743	1	0.04601	0.3784	1	15	MAPK3
GO: Biological Process	GO:0046661	male sex differentiation	0.01745	1	0.04601	0.3784	2	174	CITED2,INSR
GO: Biological Process	GO:0042129	regulation of T cell proliferation	0.01764	1	0.04639	0.3815	2	175	CD44,IHH
GO: Biological Process	GO:0010632	regulation of epithelial cell migration	0.01764	1	0.04639	0.3815	2	175	AKT1,FGF18
GO: Biological Process	GO:0043086	negative regulation of catalytic activity	0.01783	1	0.04678	0.3846	4	880	CD44,AKT1,NPR3,BGN
GO: Biological Process	GO:0007586	digestion	0.01783	1	0.04678	0.3846	2	176	NPR3,VDR
GO: Biological Process	GO:0071219	cellular response to molecule of bacterial origin	0.01802	1	0.04698	0.3863	2	177	AKT1,MAPK3
GO: Biological Process	GO:0051384	response to glucocorticoid	0.01802	1	0.04698	0.3863	2	177	CALM1,INSR
GO: Biological Process	GO:0048592	eye morphogenesis	0.01802	1	0.04698	0.3863	2	177	CITED2,IHH
GO: Biological Process	GO:0050679	positive regulation of epithelial cell proliferation	0.01802	1	0.04698	0.3863	2	177	AKT1,IHH
GO: Biological Process	GO:0050731	positive regulation of peptidyl-tyrosine phosphorylation	0.01802	1	0.04698	0.3863	2	177	CD44,IL11
GO: Biological Process	GO:0002244	hematopoietic progenitor cell differentiation	0.01841	1	0.04762	0.3915	2	179	CITED2,IL11
GO: Biological Process	GO:0010801	negative regulation of peptidyl-threonine phosphorylation	0.01858	1	0.04762	0.3915	1	16	CALM1
GO: Biological Process	GO:0050655	dermatan sulfate proteoglycan metabolic process	0.01858	1	0.04762	0.3915	1	16	BGN
GO: Biological Process	GO:2000641	regulation of early endosome to late endosome transport	0.01858	1	0.04762	0.3915	1	16	MAPK3
GO: Biological Process	GO:0036035	osteoclast development	0.01858	1	0.04762	0.3915	1	16	GPR68
GO: Biological Process	GO:0035810	positive regulation of urine volume	0.01858	1	0.04762	0.3915	1	16	NPR3
GO: Biological Process	GO:0042362	fat-soluble vitamin biosynthetic process	0.01858	1	0.04762	0.3915	1	16	VDR
GO: Biological Process	GO:1904355	positive regulation of telomere capping	0.01858	1	0.04762	0.3915	1	16	MAPK3
GO: Biological Process	GO:0072498	embryonic skeletal joint development	0.01858	1	0.04762	0.3915	1	16	IHH
GO: Biological Process	GO:1902165	regulation of intrinsic apoptotic signaling pathway in response to DNA damage by p53 class mediator	0.01858	1	0.04762	0.3915	1	16	CD44
GO: Biological Process	GO:0046639	negative regulation of alpha-beta T cell differentiation	0.01858	1	0.04762	0.3915	1	16	IHH
GO: Biological Process	GO:0045821	positive regulation of glycolytic process	0.01858	1	0.04762	0.3915	1	16	INSR
GO: Biological Process	GO:0010310	regulation of hydrogen peroxide metabolic process	0.01858	1	0.04762	0.3915	1	16	INSR
GO: Biological Process	GO:0031650	regulation of heat generation	0.01858	1	0.04762	0.3915	1	16	TNFRSF11A
GO: Biological Process	GO:0048609	multicellular organismal reproductive process	0.01878	1	0.04808	0.3953	4	894	CITED2,AKT1,IHH,VDR
GO: Biological Process	GO:0051253	negative regulation of RNA metabolic process	0.01897	1	0.04848	0.3987	5	1370	CITED2,NACC1,PTHLH,ETV7,VDR
GO: Biological Process	GO:0050866	negative regulation of cell activation	0.01899	1	0.04848	0.3987	2	182	CD44,IHH
GO: Biological Process	GO:0046328	regulation of JNK cascade	0.01919	1	0.04892	0.4023	2	183	AKT1,TNFRSF11A
GO: Biological Process	GO:1901136	carbohydrate derivative catabolic process	0.01938	1	0.04937	0.4059	2	184	CD44,BGN
GO: Biological Process	GO:0006629	lipid metabolic process	0.01952	1	0.04947	0.4068	5	1380	AKT1,ADIPOR1,MAPK3,FGF18,VDR
GO: Biological Process	GO:0007187	G-protein coupled receptor signaling pathway, coupled to cyclic nucleotide second messenger	0.01958	1	0.04947	0.4068	2	185	NPR3,PTHLH
GO: Biological Process	GO:0023061	signal release	0.01971	1	0.04947	0.4068	3	499	IL11,GPR68,KCNJ11
GO: Biological Process	GO:0051194	positive regulation of cofactor metabolic process	0.01973	1	0.04947	0.4068	1	17	INSR
GO: Biological Process	GO:0030157	pancreatic juice secretion	0.01973	1	0.04947	0.4068	1	17	NPR3
GO: Biological Process	GO:1902001	fatty acid transmembrane transport	0.01973	1	0.04947	0.4068	1	17	AKT1
GO: Biological Process	GO:0051197	positive regulation of coenzyme metabolic process	0.01973	1	0.04947	0.4068	1	17	INSR
GO: Biological Process	GO:0051280	negative regulation of release of sequestered calcium ion into cytosol	0.01973	1	0.04947	0.4068	1	17	CALM1
GO: Biological Process	GO:0060644	mammary gland epithelial cell differentiation	0.01973	1	0.04947	0.4068	1	17	AKT1
GO: Biological Process	GO:0048070	regulation of developmental pigmentation	0.01973	1	0.04947	0.4068	1	17	IHH
GO: Biological Process	GO:0032310	prostaglandin secretion	0.01973	1	0.04947	0.4068	1	17	TNFRSF11A
GO: Biological Process	GO:0032516	positive regulation of phosphoprotein phosphatase activity	0.01973	1	0.04947	0.4068	1	17	CALM1
GO: Biological Process	GO:0044320	cellular response to leptin stimulus	0.01973	1	0.04947	0.4068	1	17	ADIPOR1
GO: Biological Process	GO:0032504	multicellular organism reproduction	0.01978	1	0.04947	0.4068	4	908	CITED2,AKT1,IHH,VDR
GO: Biological Process	GO:0014031	mesenchymal cell development	0.01978	1	0.04947	0.4068	2	186	CITED2,MAPK3
GO: Cellular Component	GO:0031226	intrinsic component of plasma membrane	6.135e-05	0.008712	0.008712	0.04824	9	1717	CD44,NOX4,NPR3,ADIPOR1,TNFRSF11A,CALM1,GPR68,KCNJ11,INSR
GO: Cellular Component	GO:0005901	caveola	0.0001749	0.02483	0.01079	0.05972	3	96	MAPK3,INSR,VDR
GO: Cellular Component	GO:0044853	plasma membrane raft	0.0002279	0.03236	0.01079	0.05972	3	105	MAPK3,INSR,VDR
GO: Cellular Component	GO:0005887	integral component of plasma membrane	0.0003203	0.04549	0.01137	0.06296	8	1654	CD44,NOX4,NPR3,TNFRSF11A,CALM1,GPR68,KCNJ11,INSR
GO: Cellular Component	GO:0043235	receptor complex	0.000546	0.07754	0.01551	0.08586	4	339	CD44,COL10A1,INSR,VDR
GO: Cellular Component	GO:0042383	sarcolemma	0.0006866	0.09749	0.01625	0.08996	3	153	KCNJ11,BGN,VDR
GO: Cellular Component	GO:0098590	plasma membrane region	0.0009115	0.1294	0.01849	0.1024	6	1046	CD44,NOX4,MAPK3,KCNJ11,INSR,VDR
GO: Cellular Component	GO:0030315	T-tubule	0.002137	0.3035	0.03536	0.1958	2	60	KCNJ11,VDR
GO: Cellular Component	GO:0035692	macrophage migration inhibitory factor receptor complex	0.002294	0.3257	0.03536	0.1958	1	2	CD44
GO: Cellular Component	GO:0098589	membrane region	0.00249	0.3536	0.03536	0.1958	6	1271	CD44,NOX4,MAPK3,KCNJ11,INSR,VDR
GO: Cellular Component	GO:0098797	plasma membrane protein complex	0.002881	0.4092	0.0372	0.2059	4	532	NOX4,CALM1,KCNJ11,INSR
GO: Cellular Component	GO:0008282	ATP-sensitive potassium channel complex	0.003439	0.4883	0.03756	0.208	1	3	KCNJ11
GO: Cellular Component	GO:0005899	insulin receptor complex	0.003439	0.4883	0.03756	0.208	1	3	INSR
GO: Cellular Component	GO:0008076	voltage-gated potassium channel complex	0.004943	0.7019	0.04779	0.2646	2	92	CALM1,KCNJ11
GO: Cellular Component	GO:0034705	potassium channel complex	0.005048	0.7168	0.04779	0.2646	2	93	CALM1,KCNJ11
